# Supplementary material for: Randomised controlled trial of preconception lifestyle intervention on maternal and offspring health in people with increased risk of gestational diabetes: study protocol for the BEFORE THE BEGINNING trial
Source: PubMed Central journal article supplement — BMJ Open. 2023 Oct 4;13(10):e073572. doi: 10.1136/bmjopen-2023-073572 (PMC10551988; doi:10.1136/bmjopen-2023-073572), 2023-10-04
Supplement: bmjopen-2023-073572.draft_revisions.pdf [file bmjopen-2023-073572.draft_revisions.pdf]

# BMJ Open

BMJ Open is committed to open peer review. As part of this commitment we make the peer review history of every article we publish publicly available.

When an article is published we post the peer reviewers' comments and the authors' responses online. We also post the versions of the paper that were used during peer review. These are the versions that the peer review comments apply to.

The versions of the paper that follow are the versions that were submitted during the peer review process. They are not the versions of record or the final published versions. They should not be cited or distributed as the published version of this manuscript.

BMJ Open is an open access journal and the full, final, typeset and author-corrected version of record of the manuscript is available on our site with no access controls, subscription charges or pay-per-view fees (<http://bmjopen.bmj.com>).

If you have any questions on BMJ Open's open peer review process please email [info.bmjopen@bmj.com](mailto:info.bmjopen@bmj.com)

# BMJ Open

**A randomised controlled trial of preconception lifestyle intervention on maternal and offspring health in people with increased risk of gestational diabetes: study protocol for the BEFORE THE BEGINNING trial**

|                               |                                                                                                                                                                                                                                                                                                                                                                                                                                                                                                                                                                                                                                                                                                                                                                                                                                                                                                                                                                                                                                                                                                                                                                                                                                                                                                                                                                                                                                                                                                                                                                                                                                                                                        |
|-------------------------------|----------------------------------------------------------------------------------------------------------------------------------------------------------------------------------------------------------------------------------------------------------------------------------------------------------------------------------------------------------------------------------------------------------------------------------------------------------------------------------------------------------------------------------------------------------------------------------------------------------------------------------------------------------------------------------------------------------------------------------------------------------------------------------------------------------------------------------------------------------------------------------------------------------------------------------------------------------------------------------------------------------------------------------------------------------------------------------------------------------------------------------------------------------------------------------------------------------------------------------------------------------------------------------------------------------------------------------------------------------------------------------------------------------------------------------------------------------------------------------------------------------------------------------------------------------------------------------------------------------------------------------------------------------------------------------------|
| Journal:                      | <i>BMJ Open</i>                                                                                                                                                                                                                                                                                                                                                                                                                                                                                                                                                                                                                                                                                                                                                                                                                                                                                                                                                                                                                                                                                                                                                                                                                                                                                                                                                                                                                                                                                                                                                                                                                                                                        |
| Manuscript ID                 | bmjopen-2023-073572                                                                                                                                                                                                                                                                                                                                                                                                                                                                                                                                                                                                                                                                                                                                                                                                                                                                                                                                                                                                                                                                                                                                                                                                                                                                                                                                                                                                                                                                                                                                                                                                                                                                    |
| Article Type:                 | Protocol                                                                                                                                                                                                                                                                                                                                                                                                                                                                                                                                                                                                                                                                                                                                                                                                                                                                                                                                                                                                                                                                                                                                                                                                                                                                                                                                                                                                                                                                                                                                                                                                                                                                               |
| Date Submitted by the Author: | 10-Mar-2023                                                                                                                                                                                                                                                                                                                                                                                                                                                                                                                                                                                                                                                                                                                                                                                                                                                                                                                                                                                                                                                                                                                                                                                                                                                                                                                                                                                                                                                                                                                                                                                                                                                                            |
| Complete List of Authors:     | <p>Sujan, Md Abu Jafar; Norwegian University of Science and Technology, Department of Circulation and Medical Imaging; St Olavs Hospital Trondheim University Hospital, Department of Women's Health Skarstad, Hanna; Norwegian University of Science and Technology, Department of Circulation and Medical Imaging</p> <p>Rosvold, Guro ; Norwegian University of Science and Technology, Department of Circulation and Medical Imaging</p> <p>Fougner, Stine; St Olavs Hospital Trondheim University Hospital, Department of Endocrinology; Norwegian University of Science and Technology, Department of Clinical and Molecular Medicine</p> <p>Nyrnes, Siri; Norwegian University of Science and Technology, Department of Circulation and Medical Imaging; St Olavs Hospital Trondheim University Hospital, Children's Clinic</p> <p>Iversen, Ann-Charlotte; Norwegian University of Science and Technology, Department of Clinical and Molecular Medicine; Norwegian University of Science and Technology, Centre of Molecular Inflammation Research</p> <p>Follestad, Turid; Norwegian University of Science and Technology, Department of Clinical and Molecular Medicine; St Olavs Hospital Trondheim University Hospital, Clinical Research Unit Central Norway</p> <p>Salvesen, Kjell; St Olavs Hospital Trondheim University Hospital, Department of Women's Health; Norwegian University of Science and Technology, Department of Clinical and Molecular Medicine</p> <p>Moholdt, Trine; Norwegian University of Science and Technology, Department of Circulation and Medical Imaging; St Olavs Hospital Trondheim University Hospital, Department of Women's Health</p> |
| Keywords:                     | Clinical Trial, Maternal medicine < OBSTETRICS, Fetal medicine < OBSTETRICS, Obesity                                                                                                                                                                                                                                                                                                                                                                                                                                                                                                                                                                                                                                                                                                                                                                                                                                                                                                                                                                                                                                                                                                                                                                                                                                                                                                                                                                                                                                                                                                                                                                                                   |
|                               |                                                                                                                                                                                                                                                                                                                                                                                                                                                                                                                                                                                                                                                                                                                                                                                                                                                                                                                                                                                                                                                                                                                                                                                                                                                                                                                                                                                                                                                                                                                                                                                                                                                                                        |

SCHOLARONE™  
Manuscripts

1  
2  
3 **A randomised controlled trial of preconception lifestyle intervention on maternal**  
4 **and offspring health in people with increased risk of gestational diabetes: study**  
5 **protocol for the BEFORE THE BEGINNING trial**  
6  
7  
8  
9

10  
11  
12 Sujan MAJ<sup>1,2</sup>, Skarstad HS<sup>1</sup>, Rosvold G<sup>1</sup>, Fougner SL<sup>3,4</sup>, Nyrnes SA<sup>1,5</sup>, Iversen AC<sup>3,6</sup>, Follestad  
13 T<sup>3,7</sup>, Salvesen KÅ<sup>2,3</sup>, Moholdt T<sup>1,2,\*</sup>

14  
15  
16 <sup>1</sup>Department of Circulation and Medical Imaging, Norwegian University of Science and  
17 Technology, Trondheim, Norway

18  
19 <sup>2</sup>Department of Women's Health, St. Olavs Hospital, Trondheim University Hospital,  
20 Trondheim, Norway

21  
22 <sup>3</sup>Department of Clinical and Molecular Medicine, Norwegian University of Science and  
23 Technology, Trondheim, Norway

24  
25 <sup>4</sup>Department of Endocrinology, St. Olavs Hospital, Trondheim University Hospital,  
26 Trondheim, Norway

27  
28 <sup>5</sup>Children's clinic, St. Olavs Hospital, Trondheim University Hospital, Trondheim, Norway

29  
30 <sup>6</sup>Centre of Molecular Inflammation Research, Norwegian University of Science and  
31 Technology, Trondheim, Norway

32  
33 <sup>7</sup>Clinical Research Unit Central Norway, St. Olavs Hospital, Trondheim Norway

34  
35  
36 **\*Corresponding author**

37  
38 Postal address: NTNU, Faculty of Medicine and Health Sciences, Department of Circulation  
39 and Medical Imaging, Postbox 8905, 7491 Trondheim, Norway

40  
41  
42  
43 E-mail addresses: MAJS: [md.a.j.sujan@ntnu.no](mailto:md.a.j.sujan@ntnu.no), HSS: [hanna.s.skarstad@ntnu.no](mailto:hanna.s.skarstad@ntnu.no), GR:  
44 [guro.rosvold@ntnu.no](mailto:guro.rosvold@ntnu.no), SLF: [stine.fougner@ntnu.no](mailto:stine.fougner@ntnu.no), SAN: [siri.a.nyrnes@ntnu.no](mailto:siri.a.nyrnes@ntnu.no), ACI: [ann-](mailto:ann-charlotte.iversen@ntnu.no)  
45 [charlotte.iversen@ntnu.no](mailto:ann-charlotte.iversen@ntnu.no), TF: [turid.follestad@ntnu.no](mailto:turid.follestad@ntnu.no), KÅS: [pepe.salvesen@ntnu.no](mailto:pepe.salvesen@ntnu.no), TM:  
46 [trine.moholdt@ntnu.no](mailto:trine.moholdt@ntnu.no)  
47  
48  
49

50  
51  
52 **Word count: 3968**  
53  
54  
55  
56  
57  
58  
59  
60

## Abstract

**Background:** Gestational diabetes mellitus (GDM) is associated with increased risk for type 2 diabetes in the mother and cardiometabolic diseases in the child. The preconception period is an optimal window to adapt the lifestyle for improved outcomes for both mother and child. Our aim is to determine the effect of a lifestyle intervention, initiated before and continued throughout pregnancy, on maternal glucose tolerance and other maternal and infant cardiometabolic outcomes.

**Methods:** This ongoing randomised controlled trial aims to include 200 females aged 18-39 years old at increased risk for GDM who are contemplating pregnancy. The participants are randomly allocated 1:1 to an intervention or control group. The intervention consists of exercise (volume is set by a heart rate-based app and corresponds to  $\geq 1$  hour of weekly exercise at  $\geq 80\%$  of individual heart rate maximum), and time-restricted eating ( $\leq 10$  hours/day window of energy intake). The primary outcome measure is glucose tolerance in gestational week 28. Maternal and offspring outcomes are measured before and during pregnancy, at delivery, and at 6-8 weeks postpartum.

**Conclusion:** This study will determine the effect of a novel preconception lifestyle intervention on cardiometabolic health in women with a high risk of GDM and their infants.

**Ethics and dissemination:** The Regional Committees for Medical and Health Research Ethics in Norway has approved the study (REK 143756). The anonymized results will be submitted for publication and posted in a publicly accessible database of clinical study results.

**Abstract word count:** 248

**Trial registration number:** Clinical trial gov NCT04585581.

**Keywords:** insulin resistance, time-restricted eating, aerobic exercise, glycaemic control, diet

**Strengths and limitations of this study**

- We will include individuals at high risk of gestational diabetes to assess if exercise and time-restricted eating are feasible and effective strategies to improve glycaemic control, and thereby improve maternal metabolic health.
- We will also explore the effects of the intervention on the cardiac function of newborns.
- Due to the difficulty of blinding investigators and participants to behavioural interventions, investigators will not be blinded for outcome assessments.
- Due to the long duration of the intervention, adherence to lifestyle modifications may be difficult for some participants despite regular monitoring and motivational support.

## Introduction

The global prevalence of gestational diabetes mellitus (GDM), i.e., high plasma glucose first identified during pregnancy, continues to increase. Both environmental and genetic factors contribute to the development of GDM, and up to 14 % of live births are negatively impacted by this condition.(1) GDM typically occurs as a result of pancreatic  $\beta$ -cell dysfunction with pre-existing insulin resistance and increases the risk for type 2 diabetes mellitus (T2DM) and cardiovascular disease in the mother.(2, 3) Maternal obesity and hyperglycaemia affect the offspring through the egg cell quality, intrauterine environment, and foetal organ development. These metabolic conditions eventually increase the risk for cardiac dysfunction at birth, and early onset diabetes, obesity, and cardiovascular diseases later in life.(4-9) Higher maternal blood glucose concentration, even below the diagnostic criteria for GDM, is associated with increased birth weight, elevated levels of cord-blood C-peptide, childhood obesity, and elevated blood pressure, independent of maternal BMI.(10-12) Besides the inheritable risk factors, epigenetic modifications in utero, low-grade inflammation, and modifications of the gut microbiome can also negatively affect the cardiometabolic health of the offspring.(4)

Lifestyle interventions, including dietary changes, increased physical activity, and self-monitoring of blood glucose, are the first-line choice for GDM management.(13) However, many pregnant individuals fail to adhere to the recommendations for diet and exercise training(14, 15) and there is inconclusive evidence for clinically meaningful effects of diet-exercise interventions on pregnancy outcomes for the mother or child.(5, 16-18) Several recent randomised controlled trials (RCTs) and reviews conclude that pre-pregnancy lifestyle interventions are urgently needed to improve maternal health and increase the likelihood of adherence to a healthy lifestyle during pregnancy.(19-23) Alternative diet-exercise strategies, such as time-restricted eating (TRE) and high-intensity interval training (HIIT), have shown promising results on improving metabolic health among reproductive-aged females.(24-26) TRE can reduce appetite and hunger levels,(27, 28) and HIIT leads to improved exercise enjoyment and adherence in pregnancy, as well as greater and longer-lasting improvements in insulin sensitivity and cardiorespiratory fitness compared with continuous moderate-intensity training.(29)

Pre-pregnancy patterns of physical activity and exercise are important determinants of exercise during pregnancy,(30) and pre-pregnancy inception of healthy dietary habits is associated with a lower risk of GDM.(31-33) So far, there is limited evidence on the effectiveness of implementing both dietary and exercise-based lifestyle interventions before

1  
2  
3 pregnancy. It is highly relevant to find feasible and effective pre-pregnancy lifestyle  
4 interventions which can reduce maternal hyperglycaemia and its related negative consequences  
5 for mother and child.  
6  
7

8 The primary hypothesis for the BEFORE THE BEGINNING (BTB) trial is that the participants  
9 allocated to the intervention group will have improved maternal glucose tolerance in  
10 gestational week 28. We will also determine the effect of the intervention on secondary  
11 cardiometabolic outcomes in both the mothers and the newborns.  
12  
13  
14  
15

## 16 **Aims**

### 17 **The primary aim of BEFORE THE BEGINNING**

- 18 • To determine the effect of a lifestyle intervention, commenced preconception and  
19 continuing throughout pregnancy, on maternal glucose tolerance in pregnancy.  
20  
21  
22  
23  
24

### 25 **Secondary aims of BEFORE THE BEGINNING**

- 26 • To determine the effect of the intervention on insulin sensitivity, blood glucose,  
27 circulating lipids, body composition, cardiorespiratory fitness, systemic inflammation,  
28 and blood pressure in the mother.  
29  
30  
31
- 32 • To evaluate the effect of the intervention on cardiac function, body composition, and  
33 systemic inflammation in the newborn.  
34  
35
- 36 • To evaluate the adherence to the interventions, and their effects on sleep quality,  
37 appetite and hunger, physical activity, and dietary intake.  
38  
39

## 40 **Methods**

### 41 **Design and study setting**

42 This is a single-centre RCT with two parallel groups: an intervention group and a control group.  
43 We obtain data and perform assessments of the participants and/or their infants at baseline  
44 (before randomisation), after 8 weeks, twice during pregnancy (in gestational week 12 and 28),  
45 at delivery, and after 6-8 weeks postpartum (Figure 1). The trial is undertaken at the Norwegian  
46 University of Science and Technology (NTNU), in Trondheim, Norway, in collaboration with  
47 the St. Olav's Hospital, Trondheim, Norway. SPIRIT reporting guidelines were used in  
48 reporting this study.(34)  
49  
50  
51  
52  
53  
54  
55  
56  
57  
58  
59  
60

## Recruitment and participants

The trial is announced through social media, hospital and university webpages, local stores, and public places. Additionally, potential participants are identified through the National Population Register, and we regularly send out electronic invitations to females aged 20-35 years in Trondheim and the surrounding area to participate in the trial. The invitation prompts them to visit the study website, which contains a short description of the trial and allows potential participants to self-screen for eligibility before further screening by telephone.

Box 1 shows the inclusion and exclusion criteria for participation in the study.

### Box 1: Inclusion and exclusion criteria

#### Inclusion criteria

- Female
- Age: 18-39 years old
- Contemplating pregnancy within the next six months
- Understands oral and written Norwegian or English
- At least one of the following criteria must apply:
  - Body mass index  $\geq 25 < 40 \text{ kg/m}^2$ ,
  - Gestational diabetes in a previous pregnancy,
  - Close relative with diabetes (either parents, siblings, or children with diabetes),
  - Fasting plasma glucose  $> 5.3 \text{ mmol/L}$ ,
  - Previous newborn  $> 4.5 \text{ kg}$ , or
  - Non-European ethnicity (with one or both parents originating from an area outside Europe).

#### Exclusion criteria

- On-going pregnancy
- Trying to conceive  $\geq 6$  cycles at study entry
- Known diabetes (type 1 or 2)
- Shift work that includes night shifts  $> 2$  days per week
- Previous hyperemesis
- Known cardiovascular diseases
- High-intensity exercise  $> 2$  times per week in the last 3 months
- Habitual eating window  $\leq 12$  hours
- Bariatric surgery
- Any other reason which according to the researchers makes the potential participant ineligible

## Randomisation and allocation

After screening and assessments at baseline, the participants are randomly allocated (1:1) to the intervention or a standard care control group, after stratifying for GDM in a previous pregnancy (yes/no). We use a computer random number generator (WebCRF3) developed and



1  
2  
3 administered at The Clinical Research Unit (Klinforsk), NTNU/St. Olav's Hospital,  
4 Trondheim, Norway to randomly allocate participants using various block sizes.  
5  
6

### 7 **Intervention**

8  
9 The intervention starts before pregnancy and continues throughout pregnancy and consists of  
10 a combination of TRE and exercise. Participants are counselled to change their daily time-  
11 window of energy intake to  $\leq 10$  hours, ending no later than 19:00 hours, for minimum 5 days  
12 per week throughout the intervention. The remaining 2 days are "days off" when they can  
13 consume food *ad libitum* if they wish. Apart from current recommendations about  
14 preconception/pregnancy nutrition, we give no advice regarding food choices, nor do we  
15 encourage a reduced total energy intake.  
16  
17

18 We use the Personal Activity Intelligence (PAI) score, a science-backed activity metric  
19 based on heart rate (HR)(35, 36) to prescribe exercise. Since PAI is HR-based, high-intensity  
20 exercise gives substantially higher PAI scores than low-to-moderate-intensity exercise. The  
21 goal for the participants in the intervention group is to earn and maintain  $\geq 100$  PAI per week,  
22 which can be reached by minimum 1 hour of weekly exercise at  $\geq 80\%$  of HR maximum. One  
23 week after the baseline visit, we invite the participants for a supervised introductory exercise  
24 session and provide a brochure with exercise options (e.g., treadmill walking/running, cycling).  
25 We invite the participants for a second session 2 weeks after the introductory session. The  
26 participants can choose their mode of exercise. Once pregnant, we advise the participants to  
27 either do short work-bouts at high intensity with low-to-moderate intensity periods in-between,  
28 or longer work periods at moderate intensity (up to 85% of heart rate maximum). We contact  
29 the participants not reaching 100 PAI to offer additional supervised exercise sessions, and they  
30 can also ask for extra support and supervised exercise sessions if they want to.  
31  
32

33 Participants in the control group receive standard care and are asked to continue with  
34 their habitual physical activity and dietary habits. We contact these participants once every 8  
35 weeks to support adherence to registrations and monitoring.  
36  
37

### 38 **Experimental procedures and outcome measures**

39 The study period spans from baseline assessments in the pre-pregnancy period to 6-8 weeks  
40 after delivery (Figure 2). Participants who do not become pregnant within 6 months after  
41 inclusion in the trial (changed from 12 months from December 2022, see below under  
42 modifications to the protocol after trial commencement) are excluded. For participants who  
43  
44  
45  
46  
47  
48  
49  
50  
51  
52  
53  
54  
55  
56  
57  
58  
59  
60

1  
2  
3 experience spontaneous abortions, we add the number of weeks that the participant was  
4 pregnant plus 4 weeks to their time in the trial before exclusion pre-pregnancy.  
5

6  
7 The participants visit the lab for assessments twice during preconception (at baseline  
8 and after 8 weeks), twice during pregnancy (in gestational weeks 12 and 28), and 6 weeks after  
9 delivery. Additionally, we sample cord blood and placenta biopsies at delivery, collect standard  
10 neonatal outcomes from the hospital records, and estimate body composition and obtain  
11 echocardiography in the newborn within 72 hours after delivery and after 6-8 weeks (Figure  
12 2). All participants receive a brochure from the Norwegian Health Directorate with the current  
13 recommendations for physical activity, diet, and folic acid, and iodine supplements. The  
14 participants are invited to ultrasound examinations in gestational week 12, 19, and 32.  
15  
16  
17  
18  
19  
20

### 21 ***Primary outcome measure***

22  
23 The primary outcome measure is plasma glucose concentration obtained 2 hours after a 75 g  
24 oral glucose tolerance test (OGTT) in gestational week 28. After an overnight fast ( $\geq 10$  hours)  
25 and no exercise for  $\geq 24$  hours, the participants consume 75 g of glucose (Glucosepro,  
26 Finnamedical, Finland) diluted in 250 mL water within 5 minutes. Using an indwelling  
27 catheter, we collect venous blood before the OGTT, with subsequent collections at 30, 60, 90,  
28 and 120 minutes after ingestion of glucose.  
29  
30  
31  
32  
33

### 34 ***Secondary outcome measures***

35  
36 Secondary maternal and neonatal outcome measures are outlined in Figure 2 and detailed  
37 below.  
38  
39

### 40 ***Blood sampling and biochemistry***

41  
42 From all visits, fasting blood lipids, plasma glucose, and HbA1c are measured immediately  
43 after sampling, at St. Olav's Hospital, following local standardised procedures. Additional  
44 fasting plasma, serum, full blood, and urine are stored in a biobank at  $-80^{\circ}\text{C}$  for later analyses.  
45 GDM is recorded at Visit 3 and 4, according to the WHO 2013 criteria (fasting plasma glucose  
46 5.1-6.9 mmol/L and/or 2 hour plasma glucose 8.5-11.0 mmol/L after 75 g OGTT).(37) At the  
47 event of a GDM diagnosis, the participant and their general practitioner are informed for further  
48 evaluation and management. Insulin sensitivity will be calculated using homeostasis model  
49 assessment of insulin resistance (HOMA-IR)(38) and pancreatic beta cell function using  
50 HOMA- $\beta$ .(38) At visit 3 and 4, the area under the curve (AUC) and incremental AUC (iAUC)  
51 from glucose and insulin concentrations will be calculated from venous blood sampling every  
52 30 minutes during the 2 hour OGTT. Insulin Sensitivity Index,  $\text{ISI}_{0,120}$ .(39) insulinogenic index  
53  
54  
55  
56  
57  
58  
59  
60

1  
2  
3 during the first 30 minutes of the 2 hour OGTT,(40) and beta cell function ( $AUC_{ins}/AUC_{glu}$ )  
4 will be estimated(41).  
5  
6

### 7 8 ***Continuous glucose monitoring***

9 The participants wear a continuous glucose monitor (CGM, FreeStyle Libre 1, Abbott Diabetes  
10 Care, Norway) for 14 days at baseline (7 days pre-intervention followed by the first 7 days of  
11 intervention/control), and for 14 days at 8 weeks from baseline. From these measurements, we  
12 will determine 24-hour glycaemic control, 3-hour postprandial glucose levels (AUC) for the  
13 first meal of the day, and nocturnal glycaemic control. The CGMs are ‘masked’ for the  
14 participants to avoid lifestyle changes based on their glucose levels. We also plan to explore  
15 other CGM data that can predict glycaemic control during pregnancy, using machine learning.  
16  
17

### 18 19 20 21 22 ***Height, weight, body composition, BMI, and waist circumference***

23 Height is measured with the participants standing without shoes using a standard stadiometer.  
24 Weight and body composition are estimated in the morning after overnight fasting using  
25 bioelectrical impedance analysis (Inbody 720, Biospace CO, Korea), with participants wearing  
26 light clothes and standing barefoot. BMI is calculated as weight in kilograms divided by the  
27 square value of height in metres ( $kg/m^2$ ). To account for the increase in fat-free mass hydration  
28 as pregnancy progresses, we will use a regression equation that estimates fat-free mass density  
29 as a function of gestational age.(42) Waist circumference is measured using a measuring tape  
30 at the level of the belly button with the participant standing.  
31  
32  
33  
34  
35  
36  
37  
38  
39

### 40 41 ***Cardiorespiratory fitness***

42 We measure peak oxygen uptake ( $VO_{2peak}$ ) using indirect calorimetry (Metalyzer II, Cortex,  
43 Germany), using an individualised treadmill protocol in which the participants walk or run until  
44 volitional exhaustion. The test starts after a 10-minute warm-up. The speed or inclination is  
45 increased every 1 – 2 minutes, by 0.5 – 1.0 km/hour or 1% – 2%.  $VO_{2peak}$  is determined as the  
46 average of the three highest consecutive 10 seconds measured and will be reported as both  
47 absolute (L/min) and relative (mL/min/kg) values. We record HR throughout the exercise tests  
48 and use the peak HR recorded during the test as an estimate of the HR maximum.(43)  
49  
50  
51  
52  
53

### 54 55 ***Blood pressure and resting heart rate***

56 We use an automatic blood pressure device (Welch Allyn, Germany) to measure blood pressure  
57 (diastolic and systolic, in mmHg) and resting HR (beats per minute, bpm) on the participants’  
58  
59  
60

1  
2  
3 left arm after they have rested in a seated position for 15 minutes. We will report the average  
4 of three measurements taken at 1-minute intervals.  
5  
6

### 7 ***Physical activity, diet, and sleep***

8  
9 We use activity monitors to estimate physical activity levels, energy expenditure, and sleep  
10 duration. All participants wear Sensewear Armbands (BodyMedia, Pennsylvania, USA) for 14  
11 days at baseline (7 days pre-intervention followed by the first 7 days of intervention/control),  
12 and the participants in the intervention group wear Amazfit GTS (Huami, China) smartwatches  
13 throughout the intervention. The smartwatch is connected to the Zepp app and shares PAI data  
14 with the research team via the Memento app. Participants register their diet in an online food  
15 diary (Fatsecret app) and record the time of first and last energy intake in the project handbook  
16 for 4 days (3 weekdays and 1 weekend day) every 8 weeks. They also complete questionnaires  
17 about physical activity, sleep quality, and psychological well-being every 8 weeks throughout  
18 the study period. We use the following questionnaires: 1) International Physical Activity  
19 Questionnaire,(44) 2) Pittsburgh Sleep Quality Index,(45) and 3) Psychological General Well-  
20 Being Index.(46) At baseline, the participants fill in the Horne-Östberg Morningsness-  
21 Eveningness Questionnaire.(47) We record medication and supplements, early miscarriages,  
22 abortions, and time to pregnancy and live birth. Additionally, expectant fathers are asked to  
23 complete questionnaires at baseline and every 8 weeks throughout the trial, including questions  
24 regarding their body weight, height, physical activity, and diet. These data will be used as co-  
25 variates in later analyses.  
26  
27  
28  
29  
30  
31  
32  
33  
34  
35  
36  
37  
38

### 39 ***Neonatal and other outcomes***

40  
41 We obtain standard clinical neonatal outcomes from hospital birth records. Midwives at St.  
42 Olav's Hospital collect umbilical cord blood immediately after birth, prior to the delivery of  
43 the placenta. Placental tissues are collected from 1) around the base of the umbilical cord on  
44 the foetal side, 2) the periphery on the maternal side (full-thickness tissue) 3) the centre of the  
45 maternal side, also for storage in RNAlater solution (Invitrogen, Thermofisher scientific,  
46 Lithuania) and 4% formaldehyde solution, and 4) the periphery on the maternal side. The  
47 samples are put in 1.8 mL cryotubes and snap-frozen immediately in liquid nitrogen, before  
48 storage at -80°C for later analyses. The samples in RNAlater solution are stored at 4°C  
49 overnight, followed by storage at -80°C for later analyses. The samples in 4% formaldehyde  
50 solution are stored under a fume hood at room temperature for 48 hours before histology slide  
51 preparation in collaboration with the CMIC Histology Lab at NTNU.  
52  
53  
54  
55  
56  
57  
58  
59  
60

1  
2  
3  
4  
5  
6  
7  
8  
9  
10  
11  
12  
13  
14  
15  
16  
17  
18  
19  
20  
21  
22  
23  
24  
25  
26  
27  
28  
29  
30  
31  
32  
33  
34  
35  
36  
37  
38  
39  
40  
41  
42  
43  
44  
45  
46  
47  
48  
49  
50  
51  
52  
53  
54  
55  
56  
57  
58  
59  
60

Body composition of the newborn is estimated using bioimpedance (BioScan touch i8-nano, Maltron, UK) within 72 hours of birth, and after 6-8 weeks. An experienced paediatric cardiologist examines cardiac morphology, structure, and function in the newborn, using a Vivid E95 scanner (GE Vingmed Ultrasound, Horten, Norway) and a GE 6s, and M5s phased-array transducers (GE Healthcare, Milwaukee, WI) within 72 hours of birth, and at 6-8 weeks age. A full clinical echocardiography including conventional echocardiographic parameters as well as study images with a focus on measurement of systolic and diastolic myocardial function is performed. The scanner is equipped with research software enabling high frame rate echocardiography to study cardiac flow and tissue properties as described previously.<sup>(48-50)</sup> A corresponding group of neonates (N = 30), from mothers with no known increased risk of GDM and BMI in the normal range (18.6-24.9 kg/m<sup>2</sup>) will be used for comparison.

### ***Adherence***

We record adherence to TRE as the average daily time window for energy intake and the number of days per week that participants adhere to a  $\leq 10$ -hour time window for energy intake. Adherence to exercise is recorded as the number of PAI points the participants get per rolling 7 days. To ensure compliance and maintain adherence, we send text messages to all participants as reminders to complete questionnaires and dietary reporting.

### **Modifications to the protocol after trial commencement**

Since June 2021, we invite the participants to participate in a follow-up study after delivery in which we collect infant faecal samples (immediately after birth, at 6 weeks, and 6 months), maternal faecal samples (at 6 weeks and 6 months), and breast milk (at 6 weeks and 6 months). These samples are stored at -80°C for later analyses. Additionally, we started to offer supervised exercise training sessions to the participants in the intervention group. From November 2022, we started sending invitations using eFORSK (electronic form-based data collection, developed by Central Norway Regional Health Authority) and added 'Bariatric surgery' to the exclusion criteria. 'Any other reason which according to the researchers makes the potential participant ineligible' to undergo either or both interventions (e.g., traumatic foot injury, anorexia/bulimia, etc.) was also added to the exclusion criteria in November 2022. From December 2022, we removed 'Planned assisted fertilisation with female factor reason' from the exclusion criteria. In addition, we changed the maximum time before pregnancy from 12 months to 6 months to allow for the trial to be terminated in time for us to analyse the data

1  
2  
3 within the project period. In March 2023, the required number of total participants was reduced  
4 from 260 to 200 based on the revised calculation as described in the sample size calculation.  
5  
6

### 7 **Sample size calculation**

8  
9 The primary outcome of this study is glucose tolerance (after a 2-hour OGTT) in gestational  
10 week 28. We consider a difference between the intervention group and the control group of 1.0  
11 mmol/L as the minimally clinically relevant difference, based on findings from the HAPO  
12 study,(51) and have used the observed standard deviation (SD) in 2-hr plasma glucose from  
13 HAPO for the calculations. Calculation of the sample size for a two-sided t-test to detect a  
14 difference between the groups, using an SD of 1.3, a power of 0.90, and a significance level of  
15 0.05, yields 37 participants in each group in gestational week 28. To allow for an expected  
16 exclusion from the study due to not conceiving within the study period (~50%)(52) yielding 74  
17 per group, further drop-out during the study period (10-20%), yielding 93 per group, and to  
18 increase statistical power for secondary analyses, we initially wanted to include 260  
19 participants in the trial. However, we will terminate the inclusion of new participants when we  
20 have reached minimum 45 participants in gestational week 12 in each group (to allow for 20%  
21 dropout during pregnancy), or at least 200 participants in total (accounting for 20% dropout  
22 before pregnancy and the observed 58.5% pregnancy rate in the ongoing trial).  
23  
24  
25  
26  
27  
28  
29  
30  
31  
32  
33

### 34 **Statistical analyses**

35  
36 The primary analysis will be done according to the 'intention to treat' principle, using all  
37 obtained data irrespective of participant adherence to the intervention and completeness of  
38 outcome measures. We plan to use linear mixed models (LMMs) to compare primary and  
39 secondary continuous outcome measures between groups, with time and group x time  
40 interactions as fixed effects variables, and subject as random factor.(53) Since no systematic  
41 baseline differences between the groups are expected in RCTs, means at baseline will be  
42 constrained to be equal in the LMMs. We will report estimates with corresponding 95%  
43 confidence intervals and p-values for differences between the intervention group and the  
44 control group. We will check the normality of residuals by visual inspection of QQ-plots and  
45 perform bootstrapping in cases of non-normal model residuals. For our primary outcome  
46 measure, we will consider a p-value < 0.05 as statistically significant. For the secondary  
47 outcome measures, p-values < 0.01 will be considered statistically significant, due to multiple  
48 comparisons, and these analyses will be explorative. We will also perform per-protocol  
49 analyses: Participants who during the preconception period accumulated an average of  $\geq 75$   
50  
51  
52  
53  
54  
55  
56  
57  
58  
59  
60

1  
2  
3 PAI and adhered to  $TRE \geq 4$  days per week, will be included in the per-protocol analyses for  
4 all outcome measures. We will report additional results from all participants who were included  
5 in the trial, from the preconception period, irrespective of whether they became pregnant or not  
6 during the study period.  
7  
8  
9

### 10 11 **Blinding**

12 The study is not blinded as it is difficult to blind participants and treatment providers to  
13 behavioural intervention. However, baseline assessments are undertaken before randomisation.  
14  
15

### 16 17 **Monitoring**

18 We do not expect any adverse effects in this study. The investigators are responsible for the  
19 documentation of any adverse or serious adverse events in the Case Report Form and the  
20 Serious Adverse Events Report Form, respectively. Participants are advised to contact the  
21 investigators if they have any unusual symptoms. All serious adverse events will be reported  
22 to the sponsor (NTNU) within 24 hours after the investigators have been informed of the event.  
23  
24  
25  
26  
27  
28

### 29 30 **Patient and public involvement**

31 We have involved users in the planning of the study and will continue involving them in the  
32 implementation and dissemination. In the planning phase, we arranged a 1-hour digital  
33 workshop with users (reproductive-aged females with overweight/obesity), in which we  
34 encouraged the audience to ask questions and give us feedback about relevant topics or issues  
35 related to research participation. Regarding the challenges of long-term adherence to lifestyle  
36 changes, we use the feedback from the user to find ways to incorporate exercise training and  
37 TRE into daily life.  
38  
39  
40  
41  
42

### 43 44 **Ethics and dissemination**

45 The study is approved by the Regional Committees for Medical and Health Research Ethics in  
46 Norway (REK, reference number 143756). The comparative analysis of the neonatal  
47 echocardiography data from this study with a corresponding group of neonates from mothers  
48 with normal BMI and no increased risk of GDM is also approved (REK reference number  
49 67584). The work is conducted according to the Declaration of Helsinki and the ICMJE  
50 Recommendations for authorship. The participants sign an informed written consent before  
51 participating in the study and can at any time withdraw from the study without further  
52 explanation. Collected data are treated following the General Data Protection Regulation. We  
53 report all protocol modifications to REK. Study-specific ID numbers are used as identifiers for  
54  
55  
56  
57  
58  
59  
60

1  
2  
3 participants while entering data into an electronic case report form. Data quality is ensured by  
4 double data entry. Upon completion of the study and finalization of the study report, we will  
5 submit the results for publication and/or in a publicly accessible database of clinical study  
6 results after anonymizing the data.  
7  
8  
9

## 10 **Discussion**

11  
12 To our knowledge, the BTB study will be the first RCT to investigate the combined effects of  
13 TRE and exercise training, initiated before and continued throughout pregnancy, on  
14 cardiometabolic parameters in people at risk of GDM and their infants. We hypothesise that  
15 the combination of these two lifestyle interventions will induce an additive and clinically  
16 relevant improvement in maternal glucose tolerance, and potentially also in our secondary  
17 outcome measures in mothers and infants. As such, the initiation of lifestyle modification  
18 before pregnancy will provide a better platform for improved adherence and health outcomes,  
19 potentially breaking the intergenerational cycle of cardiometabolic disorders, and thereby  
20 reducing the risk of diabetes for future generations.  
21  
22

23  
24 So far, there is limited data on the combination of TRE and exercise training in humans.  
25 Haganes and colleagues reported that the combination of TRE and HIIT in females with a BMI  
26 of  $\geq 27$  kg/m<sup>2</sup> for 7 weeks significantly reduced HbA1c compared with a no-intervention  
27 control group and lead to greater losses in body weight, fat mass, and visceral fat area compared  
28 with either intervention alone.(26) Since the duration of the intervention is much longer in the  
29 BTB trial, there may be lower adherence to one or both intervention strategies. The possible  
30 reasons for lower adherence are that the participants may lack motivation for such a long time,  
31 find the intervention program boring and/or difficult, or develop physical symptoms that may  
32 hinder the participant to adhere to the intervention (especially during pregnancy). Combining  
33 motivational human interaction with digital interventions can increase engagement and the  
34 effectiveness of behaviour change interventions.(54) To improve adherence throughout the  
35 study period, we offer an individualised exercise regimen and provide encouragement, support,  
36 and monitor the participants regularly, both in person and over the phone.  
37  
38

39  
40 The incidence and risk of obesity, insulin resistance, and GDM persists through  
41 generations.(55) To disrupt this intergenerational cycle, it is urgently necessary to develop and  
42 implement effective and practical lifestyle intervention strategies which can improve the  
43 cardiometabolic health outcomes of both mother and offspring. If the preconception lifestyle  
44 interventions implemented in this study lead to favourable outcomes and prove to be feasible  
45  
46  
47  
48  
49  
50  
51  
52  
53  
54  
55  
56  
57  
58  
59  
60



1  
2  
3 and effective, it can pave the way for novel interventions that can be adopted in clinical practice  
4 during the preconception period, especially among those who are at risk of developing GDM.  
5  
6

### 7 **Author contributions**

8  
9 MAJS drafted the manuscript. TM, SAN, KÅS, ACI, TF, and SLF conceived and contributed  
10 to the design of the study and the plan for analyses. GR, MAJS, and HSS coordinate the study,  
11 perform measurements on test days, monitor participants, and supervise the exercise training.  
12 SAN performs the echocardiogram on the newborns. All authors provided feedback and  
13 approved the final manuscript.  
14  
15  
16  
17  
18

### 19 **Acknowledgments**

20  
21 The authors wish to thank all the participants for their contribution. We also thank the other  
22 members of the research team, Elisabeth Axe and Hilde Lund who contribute to the execution  
23 of the BEFORE THE BEGINNING Study. The equipment and lab facilities for  
24 cardiorespiratory fitness testing is provided by NeXt Move, Norwegian University of Science  
25 and Technology (NTNU), and the clinical measurements are obtained at the Clinical Research  
26 Facility, St. Olavs Hospital. We would also like to thank the midwives at the Women and  
27 Children's Centre, St. Olavs Hospital for the collection of samples related to birth. eFORSK, a  
28 stand-alone form-based information and communications technology solution for electronic  
29 collection of data, developed by Central Norway Regional Health Authority is used for sending  
30 invitations to the study.  
31  
32  
33  
34  
35  
36  
37  
38

### 39 **Funding**

40  
41 The trial is funded by the Novo Nordisk Foundation (NNF19SA058975), The Liaison  
42 Committee for education, research, and innovation in Central Norway, and The Joint Research  
43 Committee between St. Olav's Hospital and the Faculty of Medicine and Health Sciences,  
44 NTNU (FFU). The ultrasound part of the project is also funded by the Centre for Innovative  
45 Ultrasound Solutions (CIUS), a large research and innovation project led by NTNU. The  
46 sponsors have no role in study design, data collection, analysis, and publication of results.  
47  
48  
49  
50  
51

### 52 **Competing interests**

53  
54 The authors declare that they have no competing interests.  
55  
56  
57  
58  
59  
60

## References

1. International Diabetes Federation. IDF Diabetes Atlas, 10th edn. Brussels, Belgium: 2021. Available at: <https://www.diabetesatlas.org>
2. Plows JF, Stanley JL, Baker PN, Reynolds CM, Vickers MH. The Pathophysiology of Gestational Diabetes Mellitus. *Int J Mol Sci.* 2018;19(11):3342.
3. Yu Y, Soohoo M, Sørensen HT, Li J, Arah OA. Gestational Diabetes Mellitus and the Risks of Overall and Type-Specific Cardiovascular Diseases: A Population- and Sibling-Matched Cohort Study. *Diabetes Care.* 2021;45(1):151-9.
4. Moholdt T, Hawley JA. Maternal Lifestyle Interventions: Targeting Preconception Health. *Trends Endocrinol Metab.* 2020;31(8):561-9.
5. Vinter CA, Tanvig MH, Christensen MH, Ovesen PG, Jørgensen JS, Andersen MS, et al. Lifestyle Intervention in Danish Obese Pregnant Women With Early Gestational Diabetes Mellitus According to WHO 2013 Criteria Does Not Change Pregnancy Outcomes: Results From the LiP (Lifestyle in Pregnancy) Study. *Diabetes Care.* 2018;41(10):2079-85.
6. Nyrrnes SA, Garnæs KK, Salvesen Ø, Timilsina AS, Moholdt T, Ingul CB. Cardiac function in newborns of obese women and the effect of exercise during pregnancy. A randomized controlled trial. *PLoS One.* 2018;13(6):e0197334.
7. Gluckman PD, Hanson MA, Buklijas T. A conceptual framework for the developmental origins of health and disease. *J Dev Orig Health Dis.* 2010;1(1):6-18.
8. Cai G-j, Sun X-x, Zhang L, Hong Q. Association between maternal body mass index and congenital heart defects in offspring: a systematic review. *American Journal of Obstetrics and Gynecology.* 2014;211(2):91-117.
9. Petropoulos A. Congenital heart disease and maternal diabetes mellitus. *Евразийский Журнал Клинических Наук.* 2018;1(3):32-9.
10. Lowe WL, Lowe LP, Kuang A, Catalano PM, Nodzenski M, Talbot O, et al. Maternal glucose levels during pregnancy and childhood adiposity in the Hyperglycemia and Adverse Pregnancy Outcome Follow-up Study. *Diabetologia.* 2019;62(4):598-610.
11. Tam WH, Ma RCW, Ozaki R, Li AM, Chan MHM, Yuen LY, et al. In Utero Exposure to Maternal Hyperglycemia Increases Childhood Cardiometabolic Risk in Offspring. *Diabetes Care.* 2017;40(5):679-86.
12. Grunnet LG, Hansen S, Hjort L, Madsen CM, Kampmann FB, Thuesen ACB, et al. Adiposity, Dysmetabolic Traits, and Earlier Onset of Female Puberty in Adolescent Offspring of Women With Gestational Diabetes Mellitus: A Clinical Study Within the Danish National Birth Cohort. *Diabetes Care.* 2017;40(12):1746-55.
13. Management of Diabetes in Pregnancy. *Diabetes Care.* 2017;40(Suppl 1):S114-s9.
14. Gjestland K, Bø K, Owe KM, Eberhard-Gran M. Do pregnant women follow exercise guidelines? Prevalence data among 3482 women, and prediction of low-back pain, pelvic girdle pain and depression. *Br J Sports Med.* 2013;47(8):515-20.
15. Zeanah M, Schlosser SP. Adherence to ACOG Guidelines on Exercise During Pregnancy: Effect on Pregnancy Outcome. *Journal of Obstetric, Gynecologic & Neonatal Nursing.* 1993;22(4):329-35.
16. Tieu J, Shepherd E, Middleton P, Crowther CA. Dietary advice interventions in pregnancy for preventing gestational diabetes mellitus. *Cochrane Database Syst Rev.* 2017;1(1):Cd006674.
17. Martis R, Crowther CA, Shepherd E, Alsweiler J, Downie MR, Brown J. Treatments for women with gestational diabetes mellitus: an overview of Cochrane systematic reviews. *Cochrane Database Syst Rev.* 2018;8(8):Cd012327.
18. Shepherd E, Gomersall JC, Tieu J, Han S, Crowther CA, Middleton P. Combined diet and exercise interventions for preventing gestational diabetes mellitus. *Cochrane Database Syst Rev.* 2017;11(11):Cd010443.
19. Lane M, Robker RL, Robertson SA. Parenting from before conception. *Science.* 2014;345(6198):756-60.

20. Stephenson J, Heslehurst N, Hall J, Schoenaker D, Hutchinson J, Cade JE, et al. Before the beginning: nutrition and lifestyle in the preconception period and its importance for future health. *Lancet*. 2018;391(10132):1830-41.
21. Rönö K, Stach-Lempinen B, Eriksson JG, Pöyhönen-Alho M, Klemetti MM, Roine RP, et al. Prevention of gestational diabetes with a prepregnancy lifestyle intervention - findings from a randomized controlled trial. *Int J Womens Health*. 2018;10:493-501.
22. Raab R, Michel S, Günther J, Hoffmann J, Stecher L, Hauner H. Associations between lifestyle interventions during pregnancy and childhood weight and growth: a systematic review and meta-analysis. *Int J Behav Nutr Phys Act*. 2021;18(1):8-.
23. Sparks JR, Ghildayal N, Hivert M-F, Redman LM. Lifestyle interventions in pregnancy targeting GDM prevention: looking ahead to precision medicine. *Diabetologia*. 2022;65(11):1814-24.
24. Szumilewicz A S-RR, Worska A, Piernicka M, Yu H, Pajaujiene S, et al. How to HIIT while pregnant? The protocol characteristics and effects of high intensity interval training implemented during pregnancy – A systematic review. *Baltic Journal of Health and Physical Activity*. 2022;14(1):1-16.
25. Flanagan EW, Kebbe M, Sparks JR, Redman LM. Assessment of Eating Behaviors and Perceptions of Time-Restricted Eating During Pregnancy. *J Nutr*. 2022;152(2):475-83.
26. Haganes KL, Silva CP, Eyjólfsdóttir SK, Steen S, Grindberg M, Lydersen S, et al. Time-restricted eating and exercise training improve HbA1c and body composition in women with overweight/obesity: A randomized controlled trial. *Cell Metab*. 2022;34(10):1457-71.e4.
27. Ravussin E, Beyl RA, Poggiogalle E, Hsia DS, Peterson CM. Early Time-Restricted Feeding Reduces Appetite and Increases Fat Oxidation But Does Not Affect Energy Expenditure in Humans. *Obesity (Silver Spring)*. 2019;27(8):1244-54.
28. Sutton EF, Beyl R, Early KS, Cefalu WT, Ravussin E, Peterson CM. Early Time-Restricted Feeding Improves Insulin Sensitivity, Blood Pressure, and Oxidative Stress Even without Weight Loss in Men with Prediabetes. *Cell Metab*. 2018;27(6):1212-21.e3.
29. Wowdzia JB, Hazell TJ, Davenport MH. Glycemic response to acute high-intensity interval versus moderate-intensity continuous exercise during pregnancy. *Physiol Rep*. 2022;10(18):e15454.
30. Gaston A, Cramp A. Exercise during pregnancy: a review of patterns and determinants. *J Sci Med Sport*. 2011;14(4):299-305.
31. Tobias DK, Zhang C, Chavarro J, Bowers K, Rich-Edwards J, Rosner B, et al. Prepregnancy adherence to dietary patterns and lower risk of gestational diabetes mellitus. *The American Journal of Clinical Nutrition*. 2012;96(2):289-95.
32. Gao X, Zheng Q, Jiang X, Chen X, Liao Y, Pan Y. The effect of diet quality on the risk of developing gestational diabetes mellitus: A systematic review and meta-analysis. *Frontiers in Public Health*. 2023;10.
33. Yong HY, Mohd Shariff Z, Mohd Yusof BN, Rejali Z, Appannah G, Bindels J, et al. The association between dietary patterns before and in early pregnancy and the risk of gestational diabetes mellitus (GDM): Data from the Malaysian SECOST cohort. *PLoS One*. 2020;15(1):e0227246.
34. Chan AW, Tetzlaff JM, Gøtzsche PC, Altman DG, Mann H, Berlin JA, et al. SPIRIT 2013 explanation and elaboration: guidance for protocols of clinical trials. *Bmj*. 2013;346:e7586.
35. Nes BM, Gutvik CR, Lavie CJ, Nauman J, Wisløff U. Personalized Activity Intelligence (PAI) for Prevention of Cardiovascular Disease and Promotion of Physical Activity. *Am J Med*. 2017;130(3):328-36.
36. Zisko N, Skjerve KN, Tari AR, Sandbakk SB, Wisløff U, Nes BM, et al. Personal Activity Intelligence (PAI), Sedentary Behavior and Cardiovascular Risk Factor Clustering - the HUNT Study. *Prog Cardiovasc Dis*. 2017;60(1):89-95.
37. World Health O. Diagnostic criteria and classification of hyperglycaemia first detected in pregnancy. Geneva: World Health Organization; 2013 2013. Contract No.: WHO/NMH/MND/13.2.

- 1
- 2
- 3
- 4 38. Matthews DR, Hosker JP, Rudenski AS, Naylor BA, Treacher DF, Turner RC. Homeostasis model
- 5 assessment: insulin resistance and  $\beta$ -cell function from fasting plasma glucose and insulin
- 6 concentrations in man. *Diabetologia*. 1985;28(7):412-9.
- 7 39. Gutt M, Davis CL, Spitzer SB, Llabre MM, Kumar M, Czarnecki EM, et al. Validation of the insulin
- 8 sensitivity index (ISI(0,120)): comparison with other measures. *Diabetes Res Clin Pract*.
- 9 2000;47(3):177-84.
- 10 40. Phillips DI, Clark PM, Hales CN, Osmond C. Understanding oral glucose tolerance: comparison
- 11 of glucose or insulin measurements during the oral glucose tolerance test with specific measurements
- 12 of insulin resistance and insulin secretion. *Diabet Med*. 1994;11(3):286-92.
- 13 41. Stumvoll M, Mitrakou A, Pimenta W, Jenssen T, Yki-Järvinen H, Van Haefen T, et al. Use of the
- 14 oral glucose tolerance test to assess insulin release and insulin sensitivity. *Diabetes Care*.
- 15 2000;23(3):295-301.
- 16 42. Most J, Marlatt KL, Altazan AD, Redman LM. Advances in assessing body composition during
- 17 pregnancy. *Eur J Clin Nutr*. 2018;72(5):645-56.
- 18 43. Berglund IJ, Sørås SE, Relling BE, Lundgren KM, Kiel IA, Moholdt T. The relationship between
- 19 maximum heart rate in a cardiorespiratory fitness test and in a maximum heart rate test. *J Sci Med*
- 20 *Sport*. 2019;22(5):607-10.
- 21 44. Craig CL, Marshall AL, Sjöström M, Bauman AE, Booth ML, Ainsworth BE, et al. International
- 22 physical activity questionnaire: 12-country reliability and validity. *Med Sci Sports Exerc*.
- 23 2003;35(8):1381-95.
- 24 45. Buysse DJ, Reynolds CF, 3rd, Monk TH, Berman SR, Kupfer DJ. The Pittsburgh Sleep Quality
- 25 Index: a new instrument for psychiatric practice and research. *Psychiatry Res*. 1989;28(2):193-213.
- 26 46. Grossi E, Compare A. Psychological General Well-Being Index (PGWB). In: Michalos AC, editor.
- 27 *Encyclopedia of Quality of Life and Well-Being Research*. Dordrecht: Springer Netherlands; 2014. p.
- 28 5152-6.
- 29 47. Adan A, Almirall H. Horne & Östberg Morningness–Eveningness questionnaire: A reduced
- 30 scale. *Personality and Individual Differences*. 1991;12:241-53.
- 31 48. Nyrnes SA, Fadnes S, Wigen MS, Mertens L, Lovstakken L. Blood Speckle-Tracking Based on
- 32 High-Frame Rate Ultrasound Imaging in Pediatric Cardiology. *J Am Soc Echocardiogr*. 2020;33(4):493-
- 33 503.e5.
- 34 49. Sørensen K, Fadnes S, Mertens L, Henry M, Segers P, Løvstakken L, et al. Assessment of Early
- 35 Diastolic Intraventricular Pressure Difference in Children by Blood Speckle-Tracking Echocardiography.
- 36 *J Am Soc Echocardiogr*. 2023.
- 37 50. Salles S, Lovstakken L, Aase SA, Bjastad TG, Torp H. Clutter Filter Wave Imaging. *IEEE Trans*
- 38 *Ultrason Ferroelectr Freq Control*. 2019;66(9):1444-52.
- 39 51. Metzger BE, Lowe LP, Dyer AR, Trimble ER, Chaovarindr U, Coustan DR, et al. Hyperglycemia
- 40 and adverse pregnancy outcomes. *N Engl J Med*. 2008;358(19):1991-2002.
- 41 52. Mikkelsen EM, Riis AH, Wise LA, Hatch EE, Rothman KJ, Sørensen HT. Pre-gravid oral
- 42 contraceptive use and time to pregnancy: a Danish prospective cohort study. *Hum Reprod*.
- 43 2013;28(5):1398-405.
- 44 53. J T, L B, T H, J R, M W, M H. Different ways to estimate treatment effects in randomised
- 45 controlled trials. *Contemp Clin Trials Commun*. 2018;10:80-5.
- 46 54. Barker M, Dombrowski SU, Colbourn T, Fall CHD, Kriznik NM, Lawrence WT, et al. Intervention
- 47 strategies to improve nutrition and health behaviours before conception. *Lancet (London, England)*.
- 48 2018;391(10132):1853-64.
- 49 55. Ma RCW, Popkin BM. Intergenerational diabetes and obesity—A cycle to break? *PLOS*
- 50 *Medicine*. 2017;14(10):e1002415.
- 51
- 52
- 53
- 54
- 55
- 56
- 57
- 58
- 59
- 60

## FIGURE LEGENDS

### **Figure 1. Consort flow diagram of the BEFORE THE BEGINNING trial (per 03.03.2023)**

\* If the participants are not pregnant within 12 months of inclusion, they are excluded from the study. From December 2022, the time-window for exclusion if not pregnant was reduced from 12 to 6 months.

### **Figure 2. Overview of time-points for assessments in the trial.**

For peer review only

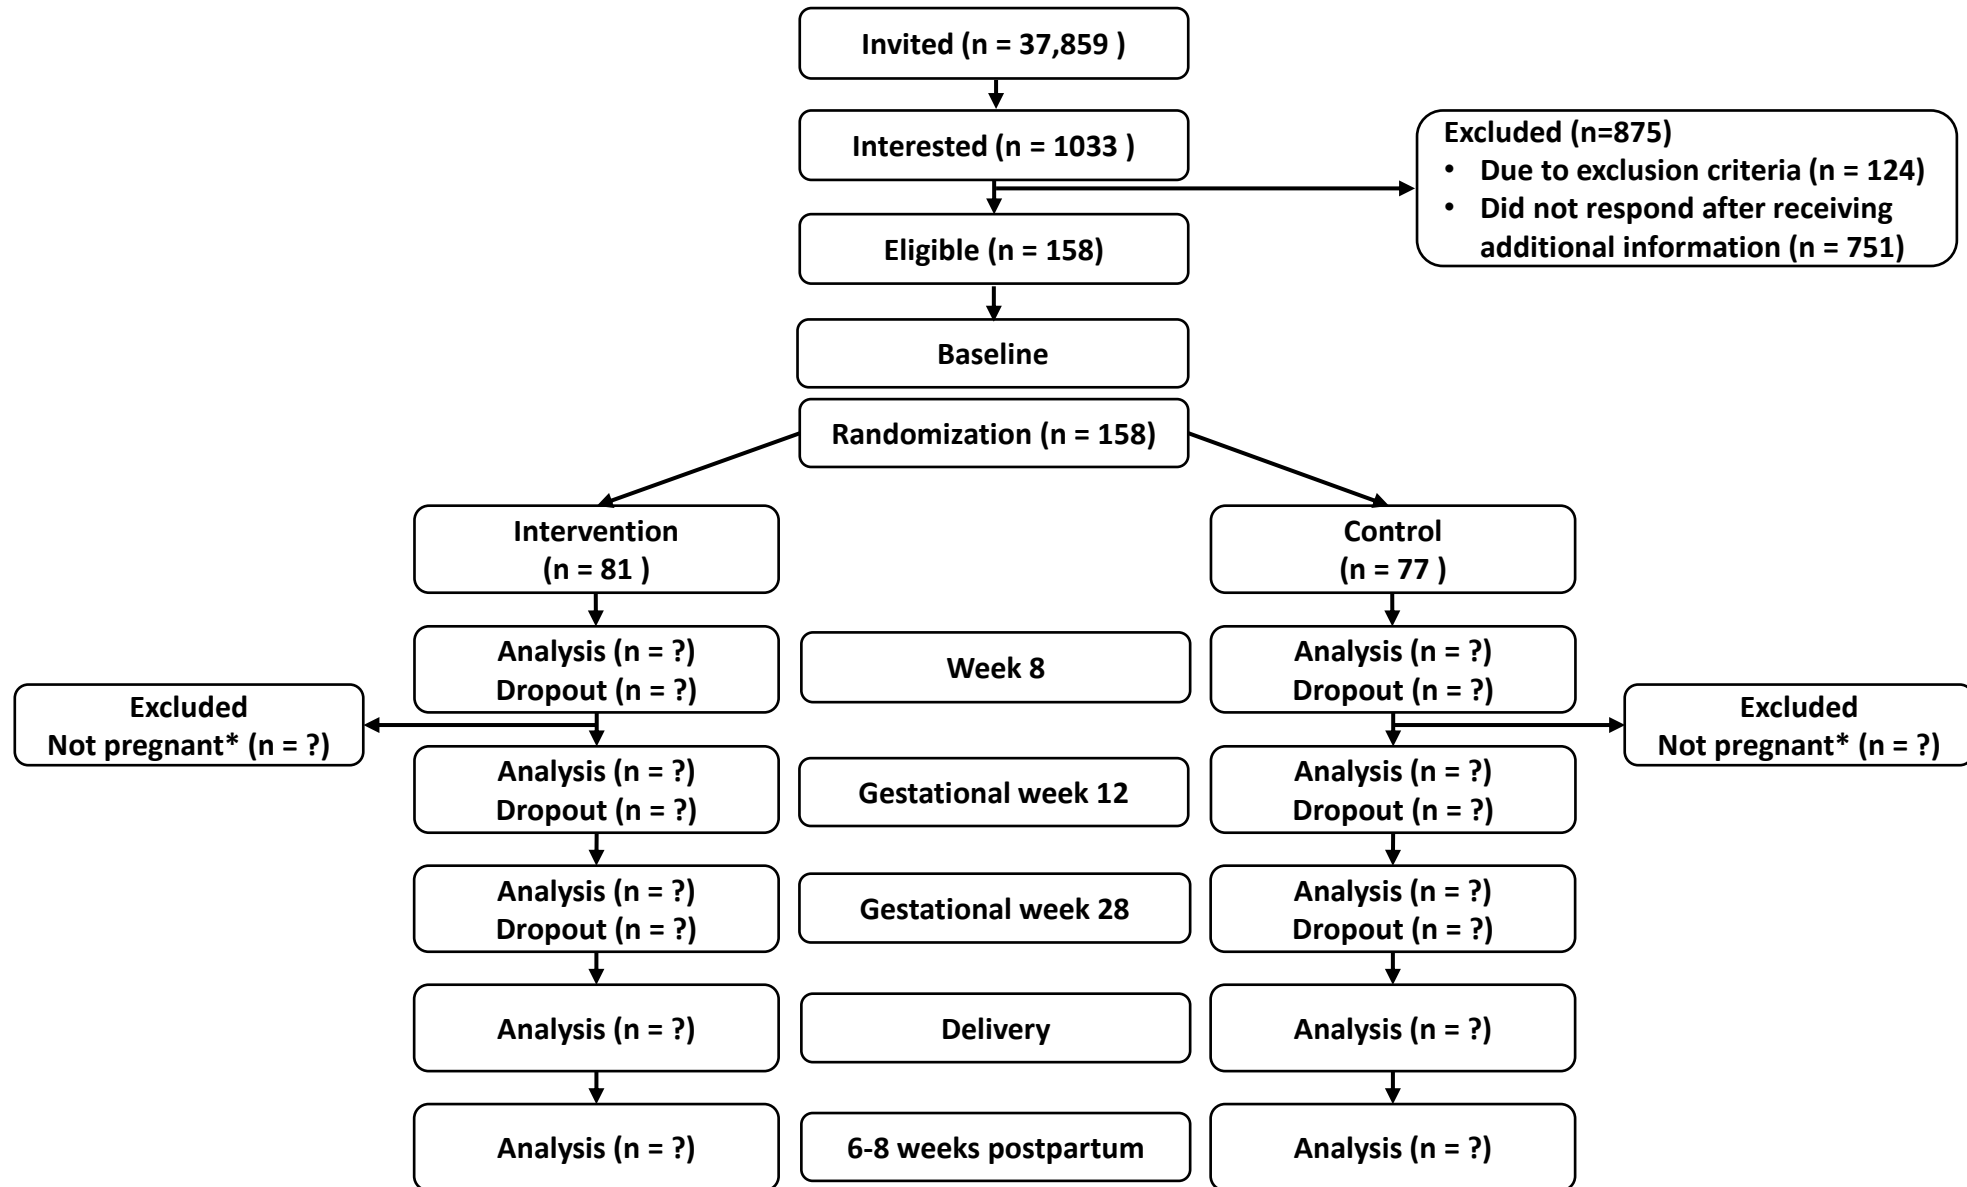

1  
2  
3  
4  
5  
6  
7  
8  
9  
10  
11  
12  
13  
14  
15  
16  
17  
18  
19  
20  
21  
22  
23  
24  
25  
26  
27  
28  
29  
30  
31  
32  
33  
34  
35  
36  
37  
38  
39  
40  
41

**Pre-pregnancy**

BMJ **Pregnancy**

**Postpartum**

**Weeks**

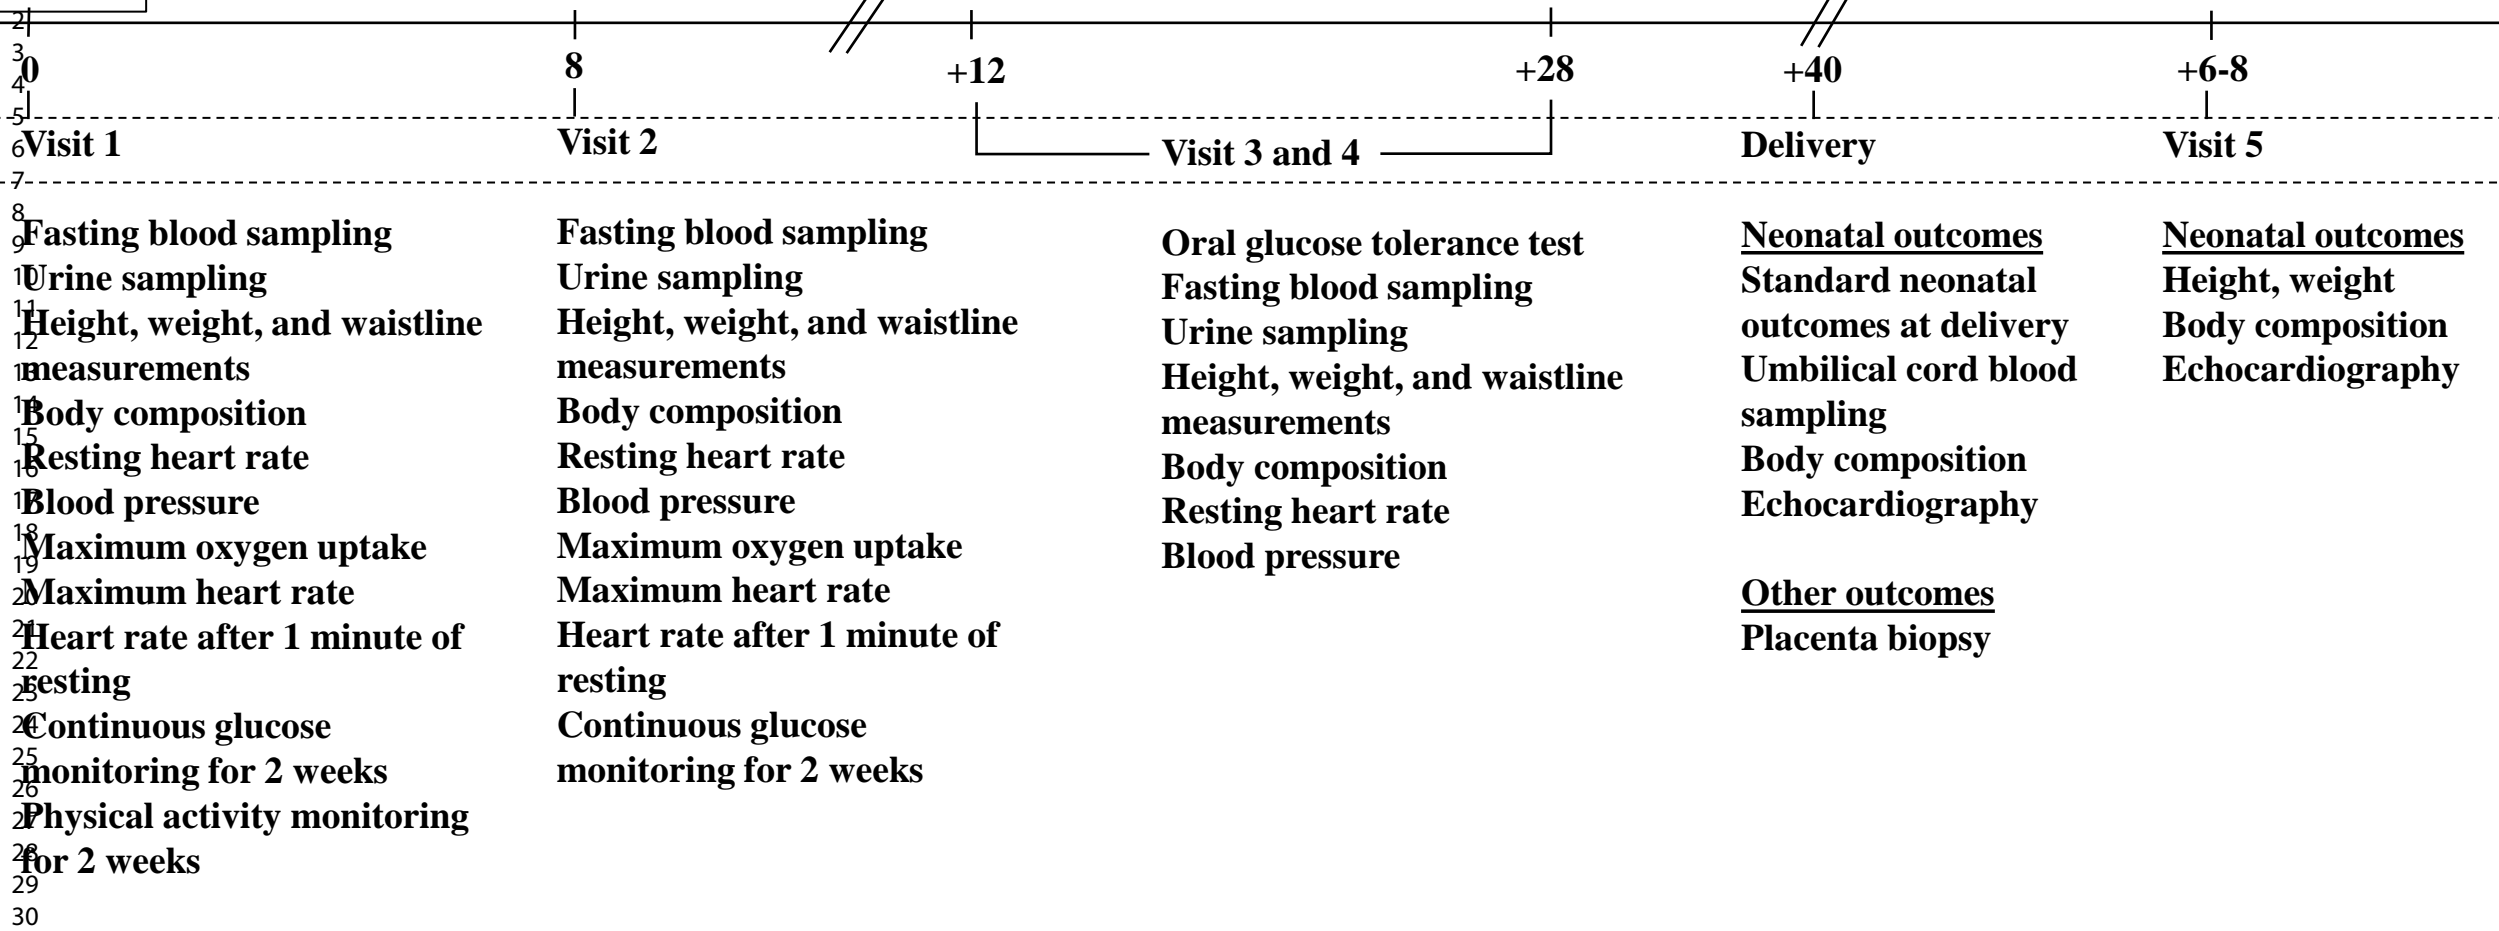

**Every 8 weeks following visit 1: Food diary (4-day registration), hunger/appetite registration, time-window of energy intake, questionnaires (physical activity, sleep, psychological well-being).**

# Reporting checklist for protocol of a clinical trial.

Based on the SPIRIT guidelines.

## Instructions to authors

Complete this checklist by entering the page numbers from your manuscript where readers will find each of the items listed below.

Your article may not currently address all the items on the checklist. Please modify your text to include the missing information. If you are certain that an item does not apply, please write "n/a" and provide a short explanation.

Upload your completed checklist as an extra file when you submit to a journal.

In your methods section, say that you used the SPIRIT reporting guidelines, and cite them as:

Chan A-W, Tetzlaff JM, Gøtzsche PC, Altman DG, Mann H, Berlin J, Dickersin K, Hróbjartsson A, Schulz KF, Parulekar WR, Krleža-Jerić K, Laupacis A, Moher D. SPIRIT 2013 Explanation and Elaboration: Guidance for protocols of clinical trials. *BMJ*. 2013;346:e7586

|                                   | Reporting Item                                                                                                                  | Page Number |
|-----------------------------------|---------------------------------------------------------------------------------------------------------------------------------|-------------|
| <b>Administrative information</b> |                                                                                                                                 |             |
| Title                             | <a href="#">#1</a> Descriptive title identifying the study design, population, interventions, and, if applicable, trial acronym | 1           |
| Trial registration                | <a href="#">#2a</a> Trial identifier and registry name. If not                                                                  | 2           |



|    |                     |                                                                |                   |
|----|---------------------|----------------------------------------------------------------|-------------------|
| 1  |                     | yet registered, name of intended registry                      |                   |
| 2  |                     |                                                                |                   |
| 3  |                     |                                                                |                   |
| 4  | Trial registration: | <a href="#">#2b</a> All items from the World Health            | n/a               |
| 5  |                     |                                                                |                   |
| 6  | data set            | Organization Trial Registration Data Set                       |                   |
| 7  |                     |                                                                |                   |
| 8  |                     |                                                                |                   |
| 9  | Protocol version    | <a href="#">#3</a> Date and version identifier                 | n/a, see appendix |
| 10 |                     |                                                                |                   |
| 11 |                     |                                                                |                   |
| 12 | Funding             | <a href="#">#4</a> Sources and types of financial, material,   | 15                |
| 13 |                     |                                                                |                   |
| 14 |                     | and other support                                              |                   |
| 15 |                     |                                                                |                   |
| 16 |                     |                                                                |                   |
| 17 | Roles and           | <a href="#">#5a</a> Names, affiliations, and roles of protocol | 1, 15             |
| 18 |                     |                                                                |                   |
| 19 | responsibilities:   | contributors                                                   |                   |
| 20 |                     |                                                                |                   |
| 21 | contributorship     |                                                                |                   |
| 22 |                     |                                                                |                   |
| 23 |                     |                                                                |                   |
| 24 |                     |                                                                |                   |
| 25 | Roles and           | <a href="#">#5b</a> Name and contact information for the trial | n/a, see appendix |
| 26 |                     |                                                                |                   |
| 27 | responsibilities:   | sponsor                                                        |                   |
| 28 |                     |                                                                |                   |
| 29 | sponsor contact     |                                                                |                   |
| 30 |                     |                                                                |                   |
| 31 | information         |                                                                |                   |
| 32 |                     |                                                                |                   |
| 33 |                     |                                                                |                   |
| 34 |                     |                                                                |                   |
| 35 | Roles and           | <a href="#">#5c</a> Role of study sponsor and funders, if      | 15                |
| 36 |                     |                                                                |                   |
| 37 | responsibilities:   | any, in study design; collection,                              |                   |
| 38 |                     |                                                                |                   |
| 39 | sponsor and funder  | management, analysis, and interpretation                       |                   |
| 40 |                     |                                                                |                   |
| 41 |                     | of data; writing of the report; and the                        |                   |
| 42 |                     |                                                                |                   |
| 43 |                     | decision to submit the report for                              |                   |
| 44 |                     |                                                                |                   |
| 45 |                     | publication, including whether they will                       |                   |
| 46 |                     |                                                                |                   |
| 47 |                     | have ultimate authority over any of these                      |                   |
| 48 |                     |                                                                |                   |
| 49 |                     | activities                                                     |                   |
| 50 |                     |                                                                |                   |
| 51 |                     |                                                                |                   |
| 52 |                     |                                                                |                   |
| 53 |                     |                                                                |                   |
| 54 | Roles and           | <a href="#">#5d</a> Composition, roles, and responsibilities   | n/a               |
| 55 |                     |                                                                |                   |
| 56 | responsibilities:   | of the coordinating centre, steering                           |                   |
| 57 |                     |                                                                |                   |
| 58 |                     |                                                                |                   |
| 59 |                     |                                                                |                   |
| 60 |                     |                                                                |                   |

1 committees  
 2  
 3 committee, endpoint adjudication  
 4  
 5 committee, data management team, and  
 6  
 7 other individuals or groups overseeing  
 8  
 9 the trial, if applicable (see Item 21a for  
 10  
 11 data monitoring committee)  
 12

## 13 Introduction

14  
 15  
 16 Background and [#6a](#) Description of research question and 4-5  
 17  
 18 rationale justification for undertaking the trial,  
 19  
 20 including summary of relevant studies  
 21  
 22 (published and unpublished) examining  
 23  
 24 benefits and harms for each intervention  
 25  
 26

27  
 28 Background and [#6b](#) Explanation for choice of comparators 4  
 29  
 30 rationale: choice of  
 31  
 32 comparators  
 33  
 34

35 Objectives [#7](#) Specific objectives or hypotheses 5  
 36  
 37

38 Trial design [#8](#) Description of trial design including type 5  
 39  
 40 of trial (eg, parallel group, crossover,  
 41  
 42 factorial, single group), allocation ratio,  
 43  
 44 and framework (eg, superiority,  
 45  
 46 equivalence, non-inferiority, exploratory)  
 47  
 48  
 49

## 50 Methods:

51  
 52  
 53 Participants,  
 54  
 55 interventions, and  
 56  
 57 outcomes  
 58  
 59  
 60

|    |                      |                      |                                            |                   |
|----|----------------------|----------------------|--------------------------------------------|-------------------|
| 1  | Study setting        | <a href="#">#9</a>   | Description of study settings (eg,         | 5                 |
| 2  |                      |                      | community clinic, academic hospital) and   |                   |
| 3  |                      |                      | list of countries where data will be       |                   |
| 4  |                      |                      | collected. Reference to where list of      |                   |
| 5  |                      |                      | study sites can be obtained                |                   |
| 6  |                      |                      |                                            |                   |
| 7  |                      |                      |                                            |                   |
| 8  |                      |                      |                                            |                   |
| 9  |                      |                      |                                            |                   |
| 10 |                      |                      |                                            |                   |
| 11 |                      |                      |                                            |                   |
| 12 |                      |                      |                                            |                   |
| 13 | Eligibility criteria | <a href="#">#10</a>  | Inclusion and exclusion criteria for       | 6 (Box 1)         |
| 14 |                      |                      | participants. If applicable, eligibility   |                   |
| 15 |                      |                      | criteria for study centres and individuals |                   |
| 16 |                      |                      | who will perform the interventions (eg,    |                   |
| 17 |                      |                      | surgeons, psychotherapists)                |                   |
| 18 |                      |                      |                                            |                   |
| 19 |                      |                      |                                            |                   |
| 20 |                      |                      |                                            |                   |
| 21 |                      |                      |                                            |                   |
| 22 |                      |                      |                                            |                   |
| 23 |                      |                      |                                            |                   |
| 24 |                      |                      |                                            |                   |
| 25 | Interventions:       | <a href="#">#11a</a> | Interventions for each group with          | 7                 |
| 26 | description          |                      | sufficient detail to allow replication,    |                   |
| 27 |                      |                      | including how and when they will be        |                   |
| 28 |                      |                      | administered                               |                   |
| 29 |                      |                      |                                            |                   |
| 30 |                      |                      |                                            |                   |
| 31 |                      |                      |                                            |                   |
| 32 |                      |                      |                                            |                   |
| 33 |                      |                      |                                            |                   |
| 34 |                      |                      |                                            |                   |
| 35 | Interventions:       | <a href="#">#11b</a> | Criteria for discontinuing or modifying    | n/a, see appendix |
| 36 | modifications        |                      | allocated interventions for a given trial  |                   |
| 37 |                      |                      | participant (eg, drug dose change in       |                   |
| 38 |                      |                      | response to harms, participant request,    |                   |
| 39 |                      |                      | or improving / worsening disease)          |                   |
| 40 |                      |                      |                                            |                   |
| 41 |                      |                      |                                            |                   |
| 42 |                      |                      |                                            |                   |
| 43 |                      |                      |                                            |                   |
| 44 |                      |                      |                                            |                   |
| 45 |                      |                      |                                            |                   |
| 46 |                      |                      |                                            |                   |
| 47 | Interventions:       | <a href="#">#11c</a> | Strategies to improve adherence to         | 11                |
| 48 | adherence            |                      | intervention protocols, and any            |                   |
| 49 |                      |                      | procedures for monitoring adherence        |                   |
| 50 |                      |                      | (eg, drug tablet return; laboratory tests) |                   |
| 51 |                      |                      |                                            |                   |
| 52 |                      |                      |                                            |                   |
| 53 |                      |                      |                                            |                   |
| 54 |                      |                      |                                            |                   |
| 55 |                      |                      |                                            |                   |
| 56 |                      |                      |                                            |                   |
| 57 | Interventions:       | <a href="#">#11d</a> | Relevant concomitant care and              | 7                 |
| 58 |                      |                      |                                            |                   |
| 59 |                      |                      |                                            |                   |
| 60 |                      |                      |                                            |                   |

|    |                      |                     |                                          |              |
|----|----------------------|---------------------|------------------------------------------|--------------|
| 1  | concomitant care     |                     | interventions that are permitted or      |              |
| 2  |                      |                     | prohibited during the trial              |              |
| 3  |                      |                     |                                          |              |
| 4  |                      |                     |                                          |              |
| 5  |                      |                     |                                          |              |
| 6  | Outcomes             | <a href="#">#12</a> | Primary, secondary, and other outcomes,  | 7-11         |
| 7  |                      |                     | including the specific measurement       |              |
| 8  |                      |                     | variable (eg, systolic blood pressure),  |              |
| 9  |                      |                     | analysis metric (eg, change from         |              |
| 10 |                      |                     | baseline, final value, time to event),   |              |
| 11 |                      |                     | method of aggregation (eg, median,       |              |
| 12 |                      |                     | proportion), and time point for each     |              |
| 13 |                      |                     | outcome. Explanation of the clinical     |              |
| 14 |                      |                     | relevance of chosen efficacy and harm    |              |
| 15 |                      |                     | outcomes is strongly recommended         |              |
| 16 |                      |                     |                                          |              |
| 17 |                      |                     |                                          |              |
| 18 |                      |                     |                                          |              |
| 19 |                      |                     |                                          |              |
| 20 |                      |                     |                                          |              |
| 21 |                      |                     |                                          |              |
| 22 |                      |                     |                                          |              |
| 23 |                      |                     |                                          |              |
| 24 |                      |                     |                                          |              |
| 25 |                      |                     |                                          |              |
| 26 |                      |                     |                                          |              |
| 27 |                      |                     |                                          |              |
| 28 |                      |                     |                                          |              |
| 29 | Participant timeline | <a href="#">#13</a> | Time schedule of enrolment,              | 5 (Figure 1) |
| 30 |                      |                     | interventions (including any run-ins and |              |
| 31 |                      |                     | washouts), assessments, and visits for   |              |
| 32 |                      |                     | participants. A schematic diagram is     | 7 (Figure 2) |
| 33 |                      |                     | highly recommended (see Figure)          |              |
| 34 |                      |                     |                                          |              |
| 35 |                      |                     |                                          |              |
| 36 |                      |                     |                                          |              |
| 37 |                      |                     |                                          |              |
| 38 |                      |                     |                                          |              |
| 39 |                      |                     |                                          |              |
| 40 |                      |                     |                                          |              |
| 41 | Sample size          | <a href="#">#14</a> | Estimated number of participants needed  | 12           |
| 42 |                      |                     | to achieve study objectives and how it   |              |
| 43 |                      |                     | was determined, including clinical and   |              |
| 44 |                      |                     | statistical assumptions supporting any   |              |
| 45 |                      |                     | sample size calculations                 |              |
| 46 |                      |                     |                                          |              |
| 47 |                      |                     |                                          |              |
| 48 |                      |                     |                                          |              |
| 49 |                      |                     |                                          |              |
| 50 |                      |                     |                                          |              |
| 51 |                      |                     |                                          |              |
| 52 |                      |                     |                                          |              |
| 53 | Recruitment          | <a href="#">#15</a> | Strategies for achieving adequate        | 6            |
| 54 |                      |                     | participant enrolment to reach target    |              |
| 55 |                      |                     | sample size                              |              |
| 56 |                      |                     |                                          |              |
| 57 |                      |                     |                                          |              |
| 58 |                      |                     |                                          |              |
| 59 |                      |                     |                                          |              |
| 60 |                      |                     |                                          |              |

1 **Methods: Assignment**

2  
3 **of interventions (for**

4  
5 **controlled trials)**

|                                                                                                                                          |                                        |                      |                                                                                                                                                                                                                                                                                                                                                                                  |     |
|------------------------------------------------------------------------------------------------------------------------------------------|----------------------------------------|----------------------|----------------------------------------------------------------------------------------------------------------------------------------------------------------------------------------------------------------------------------------------------------------------------------------------------------------------------------------------------------------------------------|-----|
| 6<br>7<br>8<br>9<br>10<br>11<br>12<br>13<br>14<br>15<br>16<br>17<br>18<br>19<br>20<br>21<br>22<br>23<br>24<br>25<br>26<br>27<br>28<br>29 | Allocation: sequence<br>generation     | <a href="#">#16a</a> | Method of generating the allocation<br>sequence (eg, computer-generated<br>random numbers), and list of any factors<br>for stratification. To reduce predictability<br>of a random sequence, details of any<br>planned restriction (eg, blocking) should<br>be provided in a separate document that<br>is unavailable to those who enrol<br>participants or assign interventions | 6   |
| 30<br>31<br>32<br>33<br>34<br>35<br>36<br>37<br>38<br>39<br>40<br>41<br>42<br>43                                                         | Allocation<br>concealment<br>mechanism | <a href="#">#16b</a> | Mechanism of implementing the<br>allocation sequence (eg, central<br>telephone; sequentially numbered,<br>opaque, sealed envelopes), describing<br>any steps to conceal the sequence until<br>interventions are assigned                                                                                                                                                         | 6   |
| 44<br>45<br>46<br>47<br>48<br>49<br>50<br>51<br>52<br>53                                                                                 | Allocation:<br>implementation          | <a href="#">#16c</a> | Who will generate the allocation<br>sequence, who will enrol participants,<br>and who will assign participants to<br>interventions                                                                                                                                                                                                                                               | 6-7 |
| 54<br>55<br>56<br>57<br>58<br>59<br>60                                                                                                   | Blinding (masking)                     | <a href="#">#17a</a> | Who will be blinded after assignment to<br>interventions (eg, trial participants, care                                                                                                                                                                                                                                                                                           | 11  |

1 providers, outcome assessors, data

2 analysts), and how

3  
4  
5  
6 Blinding (masking): [#17b](#) If blinded, circumstances under which n/a: no blinding

7 emergency unblinding is permissible, and procedure

8 unblinding for revealing a participant's allocated

9 intervention during the trial

10  
11  
12  
13  
14  
15 **Methods: Data**

16 **collection,**

17 **management, and**

18 **analysis**

19  
20  
21  
22  
23  
24  
25 Data collection plan [#18a](#) Plans for assessment and collection of 6-10

26 outcome, baseline, and other trial data,

27 including any related processes to

28 promote data quality (eg, duplicate

29 measurements, training of assessors)

30 and a description of study instruments

31 (eg, questionnaires, laboratory tests)

32 along with their reliability and validity, if

33 known. Reference to where data

34 collection forms can be found, if not in

35 the protocol

36  
37  
38  
39  
40  
41  
42  
43  
44  
45  
46  
47  
48  
49  
50  
51 Data collection plan: [#18b](#) Plans to promote participant retention 11

52 retention and complete follow-up, including list of

53 any outcome data to be collected for

54 participants who discontinue or deviate

|    |                            |                                                                 |                   |
|----|----------------------------|-----------------------------------------------------------------|-------------------|
| 1  |                            | from intervention protocols                                     |                   |
| 2  |                            |                                                                 |                   |
| 3  |                            |                                                                 |                   |
| 4  | Data management            | <a href="#">#19</a> Plans for data entry, coding, security,     | 12                |
| 5  |                            | and storage, including any related                              |                   |
| 6  |                            | processes to promote data quality (eg,                          |                   |
| 7  |                            | double data entry; range checks for data                        |                   |
| 8  |                            | values). Reference to where details of                          |                   |
| 9  |                            | data management procedures can be                               |                   |
| 10 |                            | found, if not in the protocol                                   |                   |
| 11 |                            |                                                                 |                   |
| 12 |                            |                                                                 |                   |
| 13 |                            |                                                                 |                   |
| 14 |                            |                                                                 |                   |
| 15 |                            |                                                                 |                   |
| 16 |                            |                                                                 |                   |
| 17 |                            |                                                                 |                   |
| 18 |                            |                                                                 |                   |
| 19 |                            |                                                                 |                   |
| 20 | Statistics: outcomes       | <a href="#">#20a</a> Statistical methods for analysing primary  | 12-13             |
| 21 |                            | and secondary outcomes. Reference to                            |                   |
| 22 |                            | where other details of the statistical                          |                   |
| 23 |                            | analysis plan can be found, if not in the                       |                   |
| 24 |                            | protocol                                                        |                   |
| 25 |                            |                                                                 |                   |
| 26 |                            |                                                                 |                   |
| 27 |                            |                                                                 |                   |
| 28 |                            |                                                                 |                   |
| 29 |                            |                                                                 |                   |
| 30 |                            |                                                                 |                   |
| 31 |                            |                                                                 |                   |
| 32 | Statistics: additional     | <a href="#">#20b</a> Methods for any additional analyses (eg,   | 12-13             |
| 33 | analyses                   | subgroup and adjusted analyses)                                 |                   |
| 34 |                            |                                                                 |                   |
| 35 |                            |                                                                 |                   |
| 36 |                            |                                                                 |                   |
| 37 |                            |                                                                 |                   |
| 38 | Statistics: analysis       | <a href="#">#20c</a> Definition of analysis population relating | 12-13             |
| 39 | population and             | to protocol non-adherence (eg, as                               |                   |
| 40 | missing data               | randomised analysis), and any statistical                       |                   |
| 41 |                            | methods to handle missing data (eg,                             |                   |
| 42 |                            | multiple imputation)                                            |                   |
| 43 |                            |                                                                 |                   |
| 44 |                            |                                                                 |                   |
| 45 |                            |                                                                 |                   |
| 46 |                            |                                                                 |                   |
| 47 |                            |                                                                 |                   |
| 48 |                            |                                                                 |                   |
| 49 |                            |                                                                 |                   |
| 50 | <b>Methods: Monitoring</b> |                                                                 |                   |
| 51 |                            |                                                                 |                   |
| 52 |                            |                                                                 |                   |
| 53 | Data monitoring:           | <a href="#">#21a</a> Composition of data monitoring             | n/a, see appendix |
| 54 | formal committee           | committee (DMC); summary of its role                            |                   |
| 55 |                            | and reporting structure; statement of                           |                   |
| 56 |                            |                                                                 |                   |
| 57 |                            |                                                                 |                   |
| 58 |                            |                                                                 |                   |
| 59 |                            |                                                                 |                   |
| 60 |                            |                                                                 |                   |

1 whether it is independent from the  
 2 sponsor and competing interests; and  
 3  
 4 reference to where further details about  
 5  
 6 its charter can be found, if not in the  
 7  
 8 protocol. Alternatively, an explanation of  
 9  
 10 why a DMC is not needed  
 11  
 12  
 13  
 14

|                                                 |                      |                                                                                                                                                                                                                                                     |                   |
|-------------------------------------------------|----------------------|-----------------------------------------------------------------------------------------------------------------------------------------------------------------------------------------------------------------------------------------------------|-------------------|
| 15 Data monitoring:<br>16 interim analysis      | <a href="#">#21b</a> | Description of any interim analyses and<br>17 stopping guidelines, including who will<br>18 have access to these interim results and<br>19 make the final decision to terminate the<br>20 trial<br>21<br>22<br>23<br>24                             | n/a               |
| 27 Harms                                        | <a href="#">#22</a>  | Plans for collecting, assessing, reporting,<br>28 and managing solicited and<br>29 spontaneously reported adverse events<br>30 and other unintended effects of trial<br>31 interventions or trial conduct<br>32<br>33<br>34<br>35<br>36<br>37<br>38 | 13                |
| 39 Auditing                                     | <a href="#">#23</a>  | Frequency and procedures for auditing<br>40 trial conduct, if any, and whether the<br>41 process will be independent from<br>42 investigators and the sponsor<br>43<br>44<br>45<br>46<br>47<br>48                                                   | n/a, see appendix |
| 49 <b>Ethics and</b><br>50 <b>dissemination</b> |                      |                                                                                                                                                                                                                                                     |                   |
| 54 Research ethics<br>55 approval               | <a href="#">#24</a>  | Plans for seeking research ethics<br>56 committee / institutional review board<br>57<br>58                                                                                                                                                          | 13                |



|    |                    |                                                              |       |
|----|--------------------|--------------------------------------------------------------|-------|
| 1  |                    | (REC / IRB) approval                                         |       |
| 2  |                    |                                                              |       |
| 3  |                    |                                                              |       |
| 4  | Protocol           | <a href="#">#25</a> Plans for communicating important        | 11-12 |
| 5  |                    |                                                              |       |
| 6  | amendments         | protocol modifications (eg, changes to                       |       |
| 7  |                    |                                                              |       |
| 8  |                    | eligibility criteria, outcomes, analyses) to                 |       |
| 9  |                    |                                                              |       |
| 10 |                    | relevant parties (eg, investigators, REC /                   |       |
| 11 |                    |                                                              |       |
| 12 |                    | IRBs, trial participants, trial registries,                  |       |
| 13 |                    |                                                              |       |
| 14 |                    | journals, regulators)                                        |       |
| 15 |                    |                                                              |       |
| 16 |                    |                                                              |       |
| 17 |                    |                                                              |       |
| 18 | Consent or assent  | <a href="#">#26a</a> Who will obtain informed consent or     | 13    |
| 19 |                    |                                                              |       |
| 20 |                    | assent from potential trial participants or                  |       |
| 21 |                    |                                                              |       |
| 22 |                    | authorised surrogates, and how (see                          |       |
| 23 |                    |                                                              |       |
| 24 |                    | Item 32)                                                     |       |
| 25 |                    |                                                              |       |
| 26 |                    |                                                              |       |
| 27 |                    |                                                              |       |
| 28 | Consent or assent: | <a href="#">#26b</a> Additional consent provisions for       | 11    |
| 29 |                    |                                                              |       |
| 30 | ancillary studies  | collection and use of participant data and                   |       |
| 31 |                    |                                                              |       |
| 32 |                    | biological specimens in ancillary studies,                   |       |
| 33 |                    |                                                              |       |
| 34 |                    | if applicable                                                |       |
| 35 |                    |                                                              |       |
| 36 |                    |                                                              |       |
| 37 |                    |                                                              |       |
| 38 | Confidentiality    | <a href="#">#27</a> How personal information about potential | 13-14 |
| 39 |                    |                                                              |       |
| 40 |                    | and enrolled participants will be                            |       |
| 41 |                    |                                                              |       |
| 42 |                    | collected, shared, and maintained in                         |       |
| 43 |                    |                                                              |       |
| 44 |                    | order to protect confidentiality before,                     |       |
| 45 |                    |                                                              |       |
| 46 |                    | during, and after the trial                                  |       |
| 47 |                    |                                                              |       |
| 48 |                    |                                                              |       |
| 49 |                    |                                                              |       |
| 50 | Declaration of     | <a href="#">#28</a> Financial and other competing interests  | 15    |
| 51 |                    |                                                              |       |
| 52 | interests          | for principal investigators for the overall                  |       |
| 53 |                    |                                                              |       |
| 54 |                    | trial and each study site                                    |       |
| 55 |                    |                                                              |       |
| 56 |                    |                                                              |       |
| 57 | Data access        | <a href="#">#29</a> Statement of who will have access to the | 13-14 |
| 58 |                    |                                                              |       |
| 59 |                    |                                                              |       |
| 60 |                    |                                                              |       |

|    |                       |                                                                 |              |
|----|-----------------------|-----------------------------------------------------------------|--------------|
| 1  |                       | final trial dataset, and disclosure of                          |              |
| 2  |                       |                                                                 |              |
| 3  |                       | contractual agreements that limit such                          |              |
| 4  |                       |                                                                 |              |
| 5  |                       | access for investigators                                        |              |
| 6  |                       |                                                                 |              |
| 7  |                       |                                                                 |              |
| 8  | Ancillary and post    | <a href="#">#30</a> Provisions, if any, for ancillary and post- | 13           |
| 9  |                       |                                                                 |              |
| 10 | trial care            | trial care, and for compensation to those                       |              |
| 11 |                       |                                                                 |              |
| 12 |                       | who suffer harm from trial participation                        |              |
| 13 |                       |                                                                 |              |
| 14 |                       |                                                                 |              |
| 15 | Dissemination policy: | <a href="#">#31a</a> Plans for investigators and sponsor to     | 13-14        |
| 16 |                       |                                                                 |              |
| 17 | trial results         | communicate trial results to participants,                      |              |
| 18 |                       | healthcare professionals, the public, and                       |              |
| 19 |                       | other relevant groups (eg, via publication,                     |              |
| 20 |                       | reporting in results databases, or other                        |              |
| 21 |                       | data sharing arrangements), including                           |              |
| 22 |                       | any publication restrictions                                    |              |
| 23 |                       |                                                                 |              |
| 24 |                       |                                                                 |              |
| 25 |                       |                                                                 |              |
| 26 |                       |                                                                 |              |
| 27 |                       |                                                                 |              |
| 28 |                       |                                                                 |              |
| 29 |                       |                                                                 |              |
| 30 |                       |                                                                 |              |
| 31 |                       |                                                                 |              |
| 32 | Dissemination policy: | <a href="#">#31b</a> Authorship eligibility guidelines and any  | 13-14        |
| 33 |                       |                                                                 |              |
| 34 | authorship            | intended use of professional writers                            |              |
| 35 |                       |                                                                 |              |
| 36 |                       |                                                                 |              |
| 37 |                       |                                                                 |              |
| 38 | Dissemination policy: | <a href="#">#31c</a> Plans, if any, for granting public access  | 13-14        |
| 39 |                       |                                                                 |              |
| 40 | reproducible          | to the full protocol, participant-level                         |              |
| 41 |                       | dataset, and statistical code                                   |              |
| 42 | research              |                                                                 |              |
| 43 |                       |                                                                 |              |
| 44 |                       |                                                                 |              |
| 45 | <b>Appendices</b>     |                                                                 |              |
| 46 |                       |                                                                 |              |
| 47 |                       |                                                                 |              |
| 48 | Informed consent      | <a href="#">#32</a> Model consent form and other related        | See Appendix |
| 49 |                       |                                                                 |              |
| 50 | materials             | documentation given to participants and                         |              |
| 51 |                       | authorised surrogates                                           |              |
| 52 |                       |                                                                 |              |
| 53 |                       |                                                                 |              |
| 54 |                       |                                                                 |              |
| 55 |                       |                                                                 |              |
| 56 | Biological specimens  | <a href="#">#33</a> Plans for collection, laboratory            | 7-11         |
| 57 |                       |                                                                 |              |
| 58 |                       |                                                                 |              |
| 59 |                       |                                                                 |              |
| 60 |                       |                                                                 |              |

1 evaluation, and storage of biological  
2  
3 specimens for genetic or molecular  
4  
5 analysis in the current trial and for future  
6  
7 use in ancillary studies, if applicable  
8  
9

10 The SPIRIT Explanation and Elaboration paper is distributed under the terms of the Creative  
11 Commons Attribution License CC-BY-NC. This checklist was completed on 10. March 2023 using  
12  
13 <https://www.goodreports.org/>, a tool made by the [EQUATOR Network](#) in collaboration with  
14  
15 [Penelope.ai](#)  
16  
17  
18  
19  
20  
21  
22  
23  
24  
25  
26  
27  
28  
29  
30  
31  
32  
33  
34  
35  
36  
37  
38  
39  
40  
41  
42  
43  
44  
45  
46  
47  
48  
49  
50  
51  
52  
53  
54  
55  
56  
57  
58  
59  
60

# BMJ Open

**A randomised controlled trial of preconception lifestyle intervention on maternal and offspring health in people with increased risk of gestational diabetes: study protocol for the BEFORE THE BEGINNING trial**

|                                 |                                                                                                                                                                                                                                                                                                                                                                                                                                                                                                                                                                                                                                                                                                                                                                                                                                                                                                                                                                                                                                                                                                                                                                                                                                                                                                                                                                                                                                                                                                                                                                                                                                                     |
|---------------------------------|-----------------------------------------------------------------------------------------------------------------------------------------------------------------------------------------------------------------------------------------------------------------------------------------------------------------------------------------------------------------------------------------------------------------------------------------------------------------------------------------------------------------------------------------------------------------------------------------------------------------------------------------------------------------------------------------------------------------------------------------------------------------------------------------------------------------------------------------------------------------------------------------------------------------------------------------------------------------------------------------------------------------------------------------------------------------------------------------------------------------------------------------------------------------------------------------------------------------------------------------------------------------------------------------------------------------------------------------------------------------------------------------------------------------------------------------------------------------------------------------------------------------------------------------------------------------------------------------------------------------------------------------------------|
| Journal:                        | <i>BMJ Open</i>                                                                                                                                                                                                                                                                                                                                                                                                                                                                                                                                                                                                                                                                                                                                                                                                                                                                                                                                                                                                                                                                                                                                                                                                                                                                                                                                                                                                                                                                                                                                                                                                                                     |
| Manuscript ID                   | bmjopen-2023-073572.R1                                                                                                                                                                                                                                                                                                                                                                                                                                                                                                                                                                                                                                                                                                                                                                                                                                                                                                                                                                                                                                                                                                                                                                                                                                                                                                                                                                                                                                                                                                                                                                                                                              |
| Article Type:                   | Protocol                                                                                                                                                                                                                                                                                                                                                                                                                                                                                                                                                                                                                                                                                                                                                                                                                                                                                                                                                                                                                                                                                                                                                                                                                                                                                                                                                                                                                                                                                                                                                                                                                                            |
| Date Submitted by the Author:   | 17-Jul-2023                                                                                                                                                                                                                                                                                                                                                                                                                                                                                                                                                                                                                                                                                                                                                                                                                                                                                                                                                                                                                                                                                                                                                                                                                                                                                                                                                                                                                                                                                                                                                                                                                                         |
| Complete List of Authors:       | Sujan, Md Abu Jafar; Norwegian University of Science and Technology, Department of Circulation and Medical Imaging; St Olavs Hospital Trondheim University Hospital, Department of Women's Health Skarstad, Hanna; Norwegian University of Science and Technology, Department of Circulation and Medical Imaging<br>Rosvold, Guro ; Norwegian University of Science and Technology, Department of Circulation and Medical Imaging<br>Fougner, Stine; St Olavs Hospital Trondheim University Hospital, Department of Endocrinology; Norwegian University of Science and Technology, Department of Clinical and Molecular Medicine<br>Nyrnes, Siri; Norwegian University of Science and Technology, Department of Circulation and Medical Imaging; St Olavs Hospital Trondheim University Hospital, Children's Clinic<br>Iversen, Ann-Charlotte; Norwegian University of Science and Technology, Department of Clinical and Molecular Medicine; Norwegian University of Science and Technology, Centre of Molecular Inflammation Research<br>Follestad, Turid; Norwegian University of Science and Technology, Department of Clinical and Molecular Medicine; St Olavs Hospital Trondheim University Hospital, Clinical Research Unit Central Norway<br>Salvesen, Kjell; St Olavs Hospital Trondheim University Hospital, Department of Women's Health; Norwegian University of Science and Technology, Department of Clinical and Molecular Medicine<br>Moholdt, Trine; Norwegian University of Science and Technology, Department of Circulation and Medical Imaging; St Olavs Hospital Trondheim University Hospital, Department of Women's Health |
| <b>Primary Subject Heading</b>: | Sports and exercise medicine                                                                                                                                                                                                                                                                                                                                                                                                                                                                                                                                                                                                                                                                                                                                                                                                                                                                                                                                                                                                                                                                                                                                                                                                                                                                                                                                                                                                                                                                                                                                                                                                                        |
| Secondary Subject Heading:      | Diabetes and endocrinology, Cardiovascular medicine                                                                                                                                                                                                                                                                                                                                                                                                                                                                                                                                                                                                                                                                                                                                                                                                                                                                                                                                                                                                                                                                                                                                                                                                                                                                                                                                                                                                                                                                                                                                                                                                 |
| Keywords:                       | Clinical Trial, Maternal medicine < OBSTETRICS, Fetal medicine < OBSTETRICS, Obesity, Diabetes in pregnancy < DIABETES & ENDOCRINOLOGY, NUTRITION & DIETETICS                                                                                                                                                                                                                                                                                                                                                                                                                                                                                                                                                                                                                                                                                                                                                                                                                                                                                                                                                                                                                                                                                                                                                                                                                                                                                                                                                                                                                                                                                       |
|                                 |                                                                                                                                                                                                                                                                                                                                                                                                                                                                                                                                                                                                                                                                                                                                                                                                                                                                                                                                                                                                                                                                                                                                                                                                                                                                                                                                                                                                                                                                                                                                                                                                                                                     |

1  
2  
3  
4  
5  
6  
7  
8  
9  
10  
11  
12  
13  
14  
15  
16  
17  
18  
19  
20  
21  
22  
23  
24  
25  
26  
27  
28  
29  
30  
31  
32  
33  
34  
35  
36  
37  
38  
39  
40  
41  
42  
43  
44  
45  
46  
47  
48  
49  
50  
51  
52  
53  
54  
55  
56  
57  
58  
59  
60

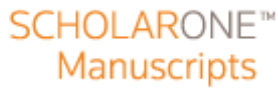

1  
2  
3 **A randomised controlled trial of preconception lifestyle intervention on maternal**  
4 **and offspring health in people with increased risk of gestational diabetes: study**  
5 **protocol for the BEFORE THE BEGINNING trial**  
6  
7  
8  
9

10  
11  
12 Sujan MAJ<sup>1,2</sup>, Skarstad HS<sup>1</sup>, Rosvold G<sup>1</sup>, Fougner SL<sup>3,4</sup>, Nyrnes SA<sup>1,5</sup>, Iversen AC<sup>3,6</sup>, Follestad  
13 T<sup>3,7</sup>, Salvesen KÅ<sup>2,3</sup>, Moholdt T<sup>1,2,\*</sup>

14  
15  
16 <sup>1</sup>Department of Circulation and Medical Imaging, Norwegian University of Science and  
17 Technology, Trondheim, Norway

18  
19 <sup>2</sup>Department of Women's Health, St. Olavs Hospital, Trondheim University Hospital,  
20 Trondheim, Norway

21  
22 <sup>3</sup>Department of Clinical and Molecular Medicine, Norwegian University of Science and  
23 Technology, Trondheim, Norway

24  
25 <sup>4</sup>Department of Endocrinology, St. Olavs Hospital, Trondheim University Hospital,  
26 Trondheim, Norway

27  
28 <sup>5</sup>Children's clinic, St. Olavs Hospital, Trondheim University Hospital, Trondheim, Norway

29  
30 <sup>6</sup>Centre of Molecular Inflammation Research, Norwegian University of Science and  
31 Technology, Trondheim, Norway

32  
33 <sup>7</sup>Clinical Research Unit Central Norway, St. Olavs Hospital, Trondheim Norway

34  
35 **\*Corresponding author**

36  
37  
38 Postal address: NTNU, Faculty of Medicine and Health Sciences, Department of Circulation  
39 and Medical Imaging, Postbox 8905, 7491 Trondheim, Norway

40  
41  
42  
43 E-mail addresses: MAJS: [md.a.j.sujan@ntnu.no](mailto:md.a.j.sujan@ntnu.no), HSS: [hanna.s.skarstad@ntnu.no](mailto:hanna.s.skarstad@ntnu.no), GR:  
44 [guro.rosvold@ntnu.no](mailto:guro.rosvold@ntnu.no), SLF: [stine.fougner@ntnu.no](mailto:stine.fougner@ntnu.no), SAN: [siri.a.nyrnes@ntnu.no](mailto:siri.a.nyrnes@ntnu.no), ACI: [ann-](mailto:ann-charlotte.iversen@ntnu.no)  
45 [charlotte.iversen@ntnu.no](mailto:ann-charlotte.iversen@ntnu.no), TF: [turid.follestad@ntnu.no](mailto:turid.follestad@ntnu.no), KÅS: [pepe.salvesen@ntnu.no](mailto:pepe.salvesen@ntnu.no), TM:  
46 [trine.moholdt@ntnu.no](mailto:trine.moholdt@ntnu.no)  
47  
48  
49

50  
51  
52 **Word count: 4199**  
53  
54  
55  
56  
57  
58  
59  
60

## Abstract

**Introduction:** Gestational diabetes mellitus (GDM) is associated with increased risk for type 2 diabetes in the mother and cardiometabolic diseases in the child. The preconception period is an optimal window to adapt the lifestyle for improved outcomes for both mother and child. Our aim is to determine the effect of a lifestyle intervention, initiated before and continued throughout pregnancy, on maternal glucose tolerance and other maternal and infant cardiometabolic outcomes.

**Methods and analysis:** This ongoing randomised controlled trial has included 167 females aged 18-39 years old at increased risk for GDM who are contemplating pregnancy. The participants were randomly allocated 1:1 to an intervention or control group. The intervention consists of exercise (volume is set by a heart rate-based app and corresponds to  $\geq 1$  hour of weekly exercise at  $\geq 80\%$  of individual heart rate maximum), and time-restricted eating ( $\leq 10$  hours/day window of energy intake). The primary outcome measure is glucose tolerance in gestational week 28. Maternal and offspring outcomes are measured before and during pregnancy, at delivery, and at 6-8 weeks postpartum. Primary and secondary continuous outcome measures will be compared between groups based on the “intention to treat” principle using linear mixed models.

**Ethics and dissemination:** The Regional Committees for Medical and Health Research Ethics in Norway has approved the study (REK 143756). The anonymised results will be submitted for publication and posted in a publicly accessible database of clinical study results.

**Abstract word count:** 236

**Trial registration number:** Clinical trial gov NCT04585581.

**Keywords:** insulin resistance, time-restricted eating, aerobic exercise, glycaemic control, diet

### Strengths and limitations of this study

- The intervention starts before and continues throughout pregnancy to make it easier for the participants to adopt an active lifestyle before pregnancy.
- This study includes individuals at high risk of GDM from multiple ethnic backgrounds, which improves the generalisability of the findings.
- The effects of the intervention on the cardiac function and body composition of the offspring will be comprehensively evaluated.
- Due to the difficulty of blinding investigators and participants to behavioural interventions, investigators will not be blinded for outcome assessments.
- Due to the long duration of the intervention, adherence to lifestyle modifications may be difficult for some participants despite regular monitoring and motivational support.



## Introduction

The global prevalence of gestational diabetes mellitus (GDM), i.e., high plasma glucose first identified during pregnancy, continues to increase. Both environmental and genetic factors contribute to the development of GDM, and up to 14 % of live births are negatively impacted by this condition.(1) GDM typically occurs because of pancreatic  $\beta$ -cell dysfunction with pre-existing insulin resistance and increases the risk for type 2 diabetes and cardiovascular disease in the mother.(2, 3) Maternal obesity and hyperglycaemia affect the offspring through the egg cell quality, intrauterine environment, and foetal organ development. These metabolic conditions eventually increase the risk for cardiac dysfunction at birth, and early onset diabetes, obesity, and cardiovascular diseases later in life.(4-9) Higher maternal blood glucose concentration, even below the diagnostic criteria for GDM, is associated with increased birth weight, elevated levels of cord-blood C-peptide, childhood obesity, and elevated blood pressure, independent of maternal body mass index (BMI).(10-12) Besides the inheritable risk factors, epigenetic modifications in utero, low-grade inflammation, and modifications of the gut microbiome can also negatively affect the cardiometabolic health of the offspring.(4)

Lifestyle interventions, including dietary changes, increased physical activity, and self-monitoring of blood glucose, are the first-line choice for GDM management.(13) However, many pregnant individuals fail to adhere to the recommendations for diet and exercise training(14, 15) and there is inconclusive evidence for clinically meaningful effects of diet-exercise interventions on pregnancy outcomes for the mother or child.(5, 16-18) Several recent randomised controlled trials (RCTs) and reviews conclude that pre-pregnancy lifestyle interventions are urgently needed to improve maternal health and increase the likelihood of adherence to a healthy lifestyle during pregnancy.(19-23) Alternative diet-exercise strategies, such as time-restricted eating (TRE) and high-intensity interval training (HIIT), have shown promising results on improving metabolic health among reproductive-aged females.(24-26) TRE is a safe and feasible intervention in individuals with overweight, obesity, prediabetes, and type 2 diabetes.(27) It has been shown to improve glucose tolerance, and insulin sensitivity, and reduce appetite, hunger, HbA1c, and total body and fat mass in this population.(28-36) While data on the effects of TRE in pregnancy are scarce, observational data suggest that longer maternal night-fasting intervals are associated with decreased fasting glucose.(37) The safety of HIIT is not yet established during pregnancy, but recent publications indicate that HIIT is safe, with higher enjoyment and improved adherence than continuous moderate-intensity

1  
2  
3 training,(38) and may provide cardiometabolic benefits for both mothers and their  
4 offspring.(39-41)  
5

6 Pre-pregnancy patterns of physical activity and exercise are important determinants of  
7 exercise during pregnancy,(42) and pre-pregnancy inception of healthy dietary habits is  
8 associated with a lower risk of GDM.(43-45) So far, there is limited evidence on the  
9 effectiveness of implementing both dietary and exercise-based lifestyle interventions before  
10 pregnancy. It is highly relevant to find feasible and effective pre-pregnancy lifestyle  
11 interventions which can reduce maternal hyperglycaemia and its related negative consequences  
12 for mother and child.  
13  
14  
15  
16  
17  
18

19 The primary hypothesis for the BEFORE THE BEGINNING (BTB) trial is that the  
20 participants allocated to the intervention group (time-restricted eating and exercise) will have  
21 improved maternal glucose tolerance in gestational week 28, compared with participants in the  
22 control group. We will also determine the effect of the intervention on secondary  
23 cardiometabolic outcomes in both the mothers and their newborns.  
24  
25  
26  
27

## 28 **Aims**

### 29 **The primary aim of BEFORE THE BEGINNING**

- 30 • To determine the effect of a lifestyle intervention, commenced preconception and  
31 continuing throughout pregnancy, on maternal glucose tolerance in pregnancy.  
32

### 33 **Secondary aims of BEFORE THE BEGINNING**

- 34 • To evaluate the effect of the intervention on insulin sensitivity, blood glucose,  
35 circulating lipids, body composition, cardiorespiratory fitness, systemic inflammation,  
36 and blood pressure in the mothers.  
37
- 38 • To evaluate the effect of the intervention on cardiac function, body composition, and  
39 systemic inflammation in the newborns.  
40
- 41 • To evaluate the adherence to the interventions, and their effects on sleep quality,  
42 appetite and hunger, physical activity, and dietary intake.  
43  
44  
45  
46  
47  
48  
49  
50  
51

## 52 **Methods**

### 53 **Design and study setting**

54 This is an ongoing single-centre RCT with two parallel groups: an intervention group and a  
55 control group, undertaken at the Norwegian University of Science and Technology (NTNU) in  
56  
57  
58  
59  
60

Trondheim, Norway, in collaboration with the St. Olav's Hospital, Trondheim, Norway. SPIRIT reporting guidelines were used in reporting this study protocol.(46)

## Recruitment and participants

The trial was announced through social media, hospital and university webpages, local stores, and public places. Additionally, potential participants were identified through the National Population Register, and we regularly sent out electronic invitations to females aged 20-35 years in Trondheim and the surrounding area to participate in the trial. The invitation prompted them to visit the study website, which contains a short description of the trial and allows potential participants to self-screen for eligibility before further screening by telephone. The first participant was included on 25<sup>th</sup> September 2020 and the last participant was included on 28<sup>th</sup> April 2023.

Box 1 shows the inclusion and exclusion criteria for participation in the study.

### Box 1: Inclusion and exclusion criteria

#### Inclusion criteria

- Female
- Age: 18-39 years old
- Contemplating pregnancy within the next six months
- Understands oral and written Norwegian or English
- At least one of the following criteria must apply:
  - Body mass index  $\geq 25 < 40 \text{ kg/m}^2$ ,
  - Gestational diabetes in a previous pregnancy,
  - Close relative with diabetes (either parents, siblings, or children with diabetes),
  - Fasting plasma glucose  $> 5.3 \text{ mmol/L}$ ,
  - Previous newborn  $> 4.5 \text{ kg}$ , or
  - Non-European ethnicity (with one or both parents originating from an area outside Europe).

#### Exclusion criteria

- On-going pregnancy
- Trying to conceive  $\geq 6$  cycles at study entry
- Known diabetes (type 1 or 2)
- Shift work that includes night shifts  $> 2$  days per week
- Previous hyperemesis
- Known cardiovascular diseases
- High-intensity exercise  $> 2$  times per week in the last 3 months
- Habitual eating window  $\leq 12$  hours
- Bariatric surgery
- Any other reason which according to the researchers makes the potential participant ineligible

## Randomisation and allocation

After screening and assessments at baseline, the participants were randomly allocated (1:1) to the intervention or a standard care control group, after stratifying for GDM in a previous pregnancy (yes/no). At the first visit, the study procedures, equipment, and applications were set up and explained to the participants.

We used a computer random number generator (WebCRF3) developed and administered at The Clinical Research Unit (Klinforsk), NTNU/St. Olav's Hospital, Trondheim, Norway to randomly allocate participants using various block sizes.

## Intervention

The intervention starts before pregnancy and continues throughout pregnancy and consists of a combination of TRE and exercise. Participants are counselled to change their daily time-window of energy intake to  $\leq 10$  hours, ending no later than 19:00 hours, for minimum 5 days per week throughout the intervention. The remaining 2 days are "days off" when they can consume food *ad libitum* if they wish. Apart from current recommendations about preconception/pregnancy nutrition, we give no advice regarding food choices, nor do we encourage a reduced total energy intake.

We use the Personal Activity Intelligence (PAI) score, a science-backed activity metric based on heart rate (HR)(47, 48) to prescribe exercise. Since PAI is HR-based, high-intensity exercise gives substantially higher PAI scores than low-to-moderate-intensity exercise. The goal for the participants in the intervention group is to earn and maintain  $\geq 100$  PAI per week, which can be reached by minimum 1 hour of weekly exercise at  $\geq 80\%$  of HR maximum. One week after the baseline visit, we invite the participants for a supervised introductory exercise session and provide a brochure with exercise options (e.g., treadmill walking/running, cycling). We invite the participants for a second session 2 weeks after the introductory session. The participants can choose their mode of exercise. Once pregnant, we advise the participants to either do short work-bouts at high intensity with low-to-moderate intensity periods in-between, or longer work periods up to 85% of heart rate maximum. We contact the participants not reaching 100 PAI to offer additional supervised exercise sessions, and they can also ask for extra support and supervised exercise sessions if they want to.

Participants in the control group receive standard care and are asked to continue with their habitual physical activity and dietary habits. We contact these participants once every 8 weeks to support adherence to registrations and monitoring.

## **Experimental procedures and outcome measures**

The study period spans from baseline assessments in the pre-pregnancy period to 6-8 weeks after delivery (Figure 1). Participants who do not become pregnant within 6 months after inclusion in the trial (changed from 12 months from December 2022, see below under modifications to the protocol after trial commencement) are excluded. For participants who experience spontaneous abortions, we add the number of weeks that the participant was pregnant plus 4 weeks to their time in the trial before exclusion pre-pregnancy.

Assessments of the participants are performed twice during preconception (at baseline before randomisation, and after 8 weeks), and twice during pregnancy (in gestational weeks 12 and 28). Outcomes in the newborns are assessed within 72 hours after delivery and at age 6-8 weeks (Figure 2). All participants receive a brochure from the Norwegian Health Directorate with the current recommendations for physical activity, diet, and folic acid, and iodine supplements. The participants are invited to ultrasound examinations in gestational weeks 12, 19, and 32.

### ***Primary outcome measure***

The primary outcome measure is plasma glucose concentration obtained 2 hours after a 75 g oral glucose tolerance test (OGTT) in gestational week 28. After an overnight fast ( $\geq 10$  hours) and no exercise for  $\geq 24$  hours, the participants consume 75 g of glucose (Glucosepro, Finnmedical, Finland) diluted in 250 mL water within 5 minutes. Using an indwelling catheter, we collect venous blood before the OGTT, with subsequent collections at 30, 60, 90, and 120 minutes after ingestion of glucose.

### ***Secondary outcome measures***

Secondary maternal and neonatal outcome measures (Figure 2) are described below.

### ***Blood sampling and biochemistry***

From all visits, fasting blood lipids, plasma glucose, and HbA1c are measured immediately after sampling, at St. Olav's Hospital, following local standardised procedures. Additional fasting plasma, serum, full blood, and urine are stored in a biobank at  $-80^{\circ}\text{C}$  for later analyses. GDM is recorded at Visit 3 and 4, according to the WHO 2013 criteria (fasting plasma glucose 5.1-6.9 mmol/L and/or 2-hour plasma glucose 8.5-11.0 mmol/L after 75 g OGTT).(49) At the event of a GDM diagnosis, the participant and their general practitioner are informed for further evaluation and management. Insulin sensitivity will be calculated using homeostasis model assessment of insulin resistance (HOMA-IR)(50) and pancreatic beta cell function using

1  
2  
3 HOMA- $\beta$ .(50) At visit 3 and 4, the area under the curve (AUC) and incremental AUC (iAUC)  
4 from glucose and insulin concentrations will be calculated from venous blood sampling every  
5 30 minutes during the 2-hour OGTT. Insulin Sensitivity Index,  $ISI_{0,120}$ .(51) insulinogenic index  
6 during the first 30 minutes of the 2-hour OGTT,(52) and beta cell function ( $AUC_{ins}/AUC_{glu}$ )  
7 will be estimated.(53)  
8  
9

### 10 11 12 ***Continuous glucose monitoring***

13 The participants wear a continuous glucose monitor (CGM, FreeStyle Libre 1, Abbott Diabetes  
14 Care, Norway) for 14 days at baseline (7 days pre-intervention followed by the first 7 days of  
15 intervention/control), and for 14 days starting at 8 weeks from baseline. From these  
16 measurements, we will determine 24-hour glycaemic control, 3-hour postprandial glucose  
17 levels (AUC) for the first meal of the day, and nocturnal glycaemic control. The screens of the  
18 CGM readers are taped over to avoid lifestyle changes based on the participants' glucose levels.  
19 We also plan to explore other CGM data that can predict glycaemic control during pregnancy,  
20 using machine learning.  
21  
22  
23  
24  
25  
26  
27  
28

### 29 ***Height, weight, body composition, BMI, and waist circumference***

30 Height is measured with the participants standing without shoes using a standard stadiometer.  
31 Weight and body composition are estimated in the morning after overnight fasting using  
32 bioelectrical impedance analysis (Inbody 720, Biospace CO, Korea), with participants wearing  
33 light clothes and standing barefoot. BMI is calculated as weight in kilograms divided by the  
34 square value of height in metres ( $kg/m^2$ ). To account for the increase in fat-free mass hydration  
35 as pregnancy progresses, we will use a regression equation that estimates fat-free mass density  
36 as a function of gestational age.(54) Waist circumference is measured using a measuring tape  
37 at the level of the belly button with the participant standing.  
38  
39  
40  
41  
42  
43  
44  
45

### 46 ***Cardiorespiratory fitness***

47 We measure peak oxygen uptake ( $VO_{2peak}$ ) using indirect calorimetry (Metalyzer II, Cortex,  
48 Germany), using an individualised treadmill protocol in which the participants walk or run until  
49 volitional exhaustion. The test starts after a 10-minute warm-up. The speed or inclination is  
50 increased every 1 – 2 minutes, by 0.5 – 1.0 km/hour or 1% – 2%.  $VO_{2peak}$  is determined as the  
51 average of the three highest consecutive 10 seconds measured and will be reported as both  
52 absolute (L/min) and relative (mL/min/kg) values. We record HR throughout the exercise tests  
53 and use the peak HR recorded during the test as an estimate of the HR maximum.(55)  
54  
55  
56  
57  
58  
59  
60

### ***Blood pressure and resting heart rate***

We use an automatic blood pressure device (Welch Allyn, Germany) to measure blood pressure (diastolic and systolic, in mmHg) and resting HR (beats per minute, bpm) on the participants' left arm after they have rested in a seated position for 15 minutes. We will report the average of three measurements taken at 1-minute intervals.

### ***Physical activity, diet, and sleep***

We use activity monitors to estimate physical activity levels, energy expenditure, and sleep duration. All participants wear Sensewear Armbands (BodyMedia, Pennsylvania, USA) for 14 days at baseline (7 days pre-intervention followed by the first 7 days of intervention/control), and the participants in the intervention group wear Amazfit GTS (Huami, China) smartwatches throughout the intervention. The smartwatch is connected to the Zepp app and shares PAI data with the research team via the Memento app. Participants register their diet in an online food diary (Fatsecret app) and record the time of first and last energy intake in the project handbook for 4 days (3 weekdays and 1 weekend day) every 8 weeks. They also complete questionnaires about physical activity, sleep quality, and psychological well-being every 8 weeks throughout the study period. We use the following questionnaires: 1) International Physical Activity Questionnaire,(56) 2) Pittsburgh Sleep Quality Index,(57) and 3) Psychological General Well-Being Index.(58) At baseline, the participants fill in the Horne-Östberg Morningsness-Eveningness Questionnaire.(59) We record medication and supplements, early miscarriages, abortions, and time to pregnancy and live birth. Additionally, expectant fathers are asked to complete questionnaires at baseline and every 8 weeks throughout the trial, including questions regarding their body weight, height, physical activity, and diet. These data will be used as co-variates in later analyses.

### ***Neonatal and other outcomes***

We obtain standard clinical neonatal outcomes from hospital birth records. Midwives at St. Olav's Hospital collect umbilical cord blood immediately after birth, prior to the delivery of the placenta. Placental tissues are collected from 1) around the base of the umbilical cord on the foetal side, 2) the periphery on the maternal side (full-thickness tissue), 3) the centre of the maternal side, also for storage in RNAlater solution (Invitrogen, Thermofisher scientific, Lithuania) and 4% formaldehyde solution, and 4) the periphery on the maternal side. The samples are put in 1.8 mL cryotubes and snap-frozen immediately in liquid nitrogen, before storage at -80°C for later analyses. The samples in RNAlater solution are stored at 4°C

overnight, followed by storage at  $-80^{\circ}\text{C}$  for later analyses. The samples in 4% formaldehyde solution are stored under a fume hood at room temperature for 48 hours before histology slide preparation in collaboration with the CMIC Histology Lab at NTNU.

Within 72 hours of birth, and at age 6-8 weeks, body composition of the newborn is estimated using bioimpedance (BioScan touch i8-nano, Maltron, UK). Additionally, an experienced paediatric cardiologist examines cardiac morphology, structure, and function in the newborn, using a Vivid E95 scanner (GE Vingmed Ultrasound, Horten, Norway) and a GE 6s, and M5s phased-array transducers (GE Healthcare, Milwaukee, WI). A full clinical echocardiography including conventional echocardiographic parameters as well as study images with a focus on measurement of systolic and diastolic myocardial function is performed. The scanner is equipped with research software enabling high frame rate echocardiography to study cardiac flow and tissue properties as described previously.<sup>(60-62)</sup> A corresponding group of neonates ( $N = 30$ ), from mothers with no known increased risk of GDM and BMI in the normal range ( $18.6\text{-}24.9\text{ kg/m}^2$ ) will be used for comparison.

### ***Adherence***

We record adherence to TRE as the average daily time-window for energy intake for 4 days every 8 weeks. Additionally, we categorise participants as adherent if they report a  $\leq 10$ -hour time-window for energy intake on  $\geq 2$  of these 4 days. Adherence to exercise is recorded as the number of PAI points the participants get per rolling 7 days. To ensure compliance and maintain adherence, we send text messages to all participants as reminders to complete questionnaires and dietary reporting. We also announce friendly competitions such as “Who can keep 100 weekly PAI points or more for a whole month?” in a Facebook group for the participants. The data are only accessible to the researchers and a gift card is awarded to the winners.

### **Modifications to the protocol after trial commencement**

Since June 2021, we invite the participants to participate in a follow-up study after delivery in which we collect infant faecal samples (immediately after birth, at 6 weeks, and 6 months), maternal faecal samples (at 6 weeks and 6 months), and breast milk (at 6 weeks and 6 months). These samples are stored at  $-80^{\circ}\text{C}$  for later analyses. Additionally, we started to offer supervised exercise training sessions to the participants in the intervention group. From November 2022, we started sending invitations using eFORSK (electronic form-based data collection, developed by Central Norway Regional Health Authority) and added ‘Bariatric



1  
2  
3 surgery' to the exclusion criteria. 'Any other reason which according to the researchers makes  
4 the potential participant ineligible' to undergo either or both interventions (e.g., traumatic foot  
5 injury, anorexia/bulimia, etc.) was also added to the exclusion criteria in November 2022. From  
6 December 2022, we removed 'Planned assisted fertilisation with female factor reason' from  
7 the exclusion criteria. In addition, we changed the maximum time before pregnancy from 12  
8 months to 6 months to allow for the trial to be terminated in time for us to analyse the data  
9 within the project period. In March 2023, the required number of total participants was reduced  
10 from 260 to 200 based on the revised calculation as described in the sample size calculation,  
11 with additional specification of stopping before 200 if we had sufficient pregnant participants  
12 for the primary outcome measure. In June 2023, we changed from Amazfit GTS to Polar Ignite  
13 2 (Polar, Finland) smartwatch and from Zepp and Memento to Polar Flow and Mia app.  
14  
15  
16  
17  
18  
19  
20  
21  
22

### 23 **Sample size calculation**

24  
25 The primary outcome of this study is glucose tolerance (after a 2-hour OGTT) in gestational  
26 week 28. The HAPO study results(63) indicate strong, continuous associations of maternal  
27 glucose levels, even below the diagnostic level of GDM with adverse maternal and offspring  
28 outcomes. Based on the increasing risk of adverse maternal and offspring outcomes across 2-  
29 hour plasma glucose categories with a change of ~1 mmol/L, we consider a difference of 1  
30 mmol/L in 2-hour plasma glucose after OGTT between the intervention and control group as  
31 clinically relevant. We also used the observed standard deviation (1 SD = 1.3 mmol/L) in 2-  
32 hour plasma glucose after OGTT in the HAPO study for the sample size calculations.  
33 Calculation of the sample size for a two-sided t-test to detect a difference of 1 mmol/L between  
34 the groups, using an SD of 1.3 mmol/L, a power of 0.90, and a significance level of 0.05, yields  
35 37 participants in each group in gestational week 28. To allow for an expected exclusion from  
36 the study due to not conceiving within the study period (~50%)(64) yielding 74 per group,  
37 further drop-out during the study period (10-20%), yielding 93 per group, and to increase  
38 statistical power for secondary analyses, we initially wanted to include 260 participants in the  
39 trial.  
40  
41  
42  
43  
44  
45  
46  
47  
48  
49

50  
51 However, we terminated the inclusion of new participants at 167 participants since we  
52 had reached 47 participants in each group who were pregnant in gestational week 12. With this  
53 number of participants, we foresee that we will have at least 37 participants in each group in  
54 gestational week 28, allowing for up to 20% dropout during pregnancy. We expect more  
55 participants who are already included to become pregnant in the upcoming period, which will  
56 increase the number of pregnant participants.  
57  
58  
59  
60

### Statistical analyses

The primary analysis will be done according to the ‘intention to treat’ principle, using all obtained data irrespective of participant adherence to the intervention and completeness of outcome measures. We plan to use linear mixed models (LMMs) to compare primary and secondary continuous outcome measures between groups, with time and group x time interactions as fixed effects variables, and subject as random factor.<sup>(65)</sup> Since no systematic baseline differences between the groups are expected in RCTs, means at baseline will be constrained to be equal in the LMMs. We will report estimates with corresponding 95% confidence intervals and p-values for differences between the intervention group and the control group. We will check the normality of residuals by visual inspection of QQ-plots and bootstrapping, transformations or non-parametric methods will be used in cases of non-normal model residuals. For the primary outcome measure, we will consider a p-value < 0.05 as statistically significant. For the secondary outcome measures, p-values < 0.01 will be considered statistically significant, due to multiple comparisons, and these analyses will be explorative. We will also perform per-protocol analyses: Participants with an average of  $\geq 75$  PAI per rolling week and adherence to TRE (as per definition above) during the preconception period will be included in the per-protocol analyses for all outcome measures. We will report additional results from all participants who were included in the trial, from the preconception period, irrespective of whether they became pregnant or not during the study period.

### Blinding

The study is not blinded as it is difficult to blind participants and treatment providers to behavioural intervention. However, baseline assessments are undertaken before randomisation.

### Monitoring

We do not expect any adverse effects in this study. If pregnant women are worried about foetal safety during exercise, we have experienced personnel available in the research group to monitor foetal heart rate during exercise sessions. The investigators are responsible for the documentation of any adverse or serious adverse events in the Case Report Form and the Serious Adverse Events Report Form, respectively. Participants are advised to contact the investigators if they have any unusual symptoms. All serious adverse events will be reported to the sponsor (NTNU) within 24 hours after the investigators have been informed of the event.

### **Patient and public involvement**

We have involved users in the planning of the study and will continue involving them in the implementation and dissemination. In the planning phase, we arranged a 1-hour digital workshop with users (reproductive-aged females with overweight/obesity), where we encouraged the audience to ask questions and give us feedback about relevant topics or issues related to participation. Regarding the challenges of long-term adherence, we use these feedbacks to find ways to incorporate exercise training and TRE into daily life.

### **Ethics and dissemination**

The Regional Committees for Medical and Health Research Ethics in Norway approved the study (REK, reference number 143756). The comparative analysis of the neonatal echocardiography data from this study with a corresponding group of neonates from mothers with normal BMI and no increased risk of GDM is also approved (REK reference number 67584). The work is conducted according to the Declaration of Helsinki and the ICMJE Recommendations for authorship. The participants sign an informed written consent before participating in the study and can at any time withdraw from the study without further explanation. Study specific ID numbers are used as participants' identification. We ensure data quality by double data entry into an electronic CRF and treat the collected data following the General Data Protection Regulation. All protocol modifications are reported to REK. Upon completion of the study and finalization of the study report, we will submit the results for publication and/or in a publicly accessible database of clinical study results after anonymizing the data.

### **Discussion**

Based on a thorough literature search, the BTB study will be the first RCT to investigate the combined effects of TRE and exercise training, initiated before and continued throughout pregnancy, on cardiometabolic parameters in people at risk of GDM and their infants. We hypothesise that the combination of these two lifestyle interventions will induce an additive and clinically relevant improvement in maternal glucose tolerance, and potentially also in our secondary outcome measures in mothers and infants. As such, the initiation of lifestyle modification before pregnancy will provide a better platform for improved adherence and health outcomes, potentially breaking the intergenerational cycle of cardiometabolic disorders, and thereby reducing the risk of diabetes for future generations.

1  
2  
3  
4  
5  
6  
7  
8  
9  
10  
11  
12  
13  
14  
15  
16  
17  
18  
19  
20  
21  
22  
23  
24  
25  
26  
27  
28  
29  
30  
31  
32  
33  
34  
35  
36  
37  
38  
39  
40  
41  
42  
43  
44  
45  
46  
47  
48  
49  
50  
51  
52  
53  
54  
55  
56  
57  
58  
59  
60

So far, there is limited data on the combination of TRE and exercise training in humans. Haganes and colleagues reported that the combination of TRE and HIIT in females with a BMI of  $\geq 27$  kg/m<sup>2</sup> for 7 weeks significantly reduced HbA1c compared with a no-intervention control group and lead to greater losses in body weight, fat mass, and visceral fat area compared with either intervention alone.(26) Since the duration of the intervention is much longer in the BTB trial, there may be lower adherence to one or both intervention strategies. The possible reasons for lower adherence are that the participants may lack motivation for such a long time, find the intervention program boring and/or difficult, or develop physical symptoms that may hinder the participant to adhere to the intervention (especially during pregnancy). Combining motivational human interaction with digital interventions can increase engagement and the effectiveness of behaviour change interventions.(66) To improve adherence throughout the study period, we offer an individualised exercise regimen and provide encouragement, support, and monitor the participants regularly, both in person and over the phone.

The incidence and risk of obesity, insulin resistance, and GDM persists through generations.(67) To disrupt this intergenerational cycle, it is urgently necessary to develop and implement effective and practical lifestyle intervention strategies which can improve the cardiometabolic health outcomes of both mother and offspring. If the preconception lifestyle interventions implemented in this study lead to favourable outcomes and prove to be feasible and effective, it can pave the way for novel interventions that can be adopted in clinical practice during the preconception period, especially among those who are at risk of developing GDM.

### **Author contributions**

MAJS drafted the manuscript. TM, SAN, KÅS, ACI, TF, and SLF conceived and contributed to the design of the study and the plan for analyses. GR, MAJS, and HSS coordinate the study, perform measurements on test days, monitor participants, and supervise the exercise training. SAN performs the echocardiogram on the newborns. All authors provided feedback and approved the final manuscript.

### **Acknowledgments**

The authors wish to thank all the participants for their contribution. We also thank the other members of the research team, Elisabeth Axe and Hilde Lund, who contributed to the execution of the BEFORE THE BEGINNING Study. The equipment and lab facilities for cardiorespiratory fitness testing is provided by NeXt Move, Norwegian University of Science and Technology (NTNU), and the clinical measurements are obtained at the Clinical Research

1  
2  
3 Facility, St. Olavs Hospital. We would also like to thank the midwives at the Women and  
4 Children's Centre, St. Olavs Hospital for the collection of samples related to birth. eFORSK, a  
5 stand-alone form-based information and communications technology solution for electronic  
6 collection of data, developed by Central Norway Regional Health Authority is used for sending  
7 invitations to the study.  
8  
9  
10  
11  
12

### 13 **Funding**

14 The trial is funded by the Novo Nordisk Foundation (NNF19SA058975), The Liaison  
15 Committee for education, research, and innovation in Central Norway (N/A), and The Joint  
16 Research Committee between St. Olav's Hospital and the Faculty of Medicine and Health  
17 Sciences, NTNU (FFU) (N/A). The ultrasound part of the project is also funded by the Centre  
18 for Innovative Ultrasound Solutions (CIUS) (N/A), a large research and innovation project led  
19 by NTNU. The sponsors have no role in study design, data collection, analysis, and publication  
20 of results.  
21  
22  
23  
24  
25  
26  
27

### 28 **Competing interests**

29 The authors declare that they have no competing interests.  
30  
31  
32  
33  
34  
35  
36  
37  
38  
39  
40  
41  
42  
43  
44  
45  
46  
47  
48  
49  
50  
51  
52  
53  
54  
55  
56  
57  
58  
59  
60

## References

1. International Diabetes Federation. IDF Diabetes Atlas, 10th edn. Brussels, Belgium: 2021. Available at: <https://www.diabetesatlas.org>
2. Plows JF, Stanley JL, Baker PN, Reynolds CM, Vickers MH. The Pathophysiology of Gestational Diabetes Mellitus. *Int J Mol Sci.* 2018;19(11):3342.
3. Yu Y, Soohoo M, Sørensen HT, Li J, Arah OA. Gestational Diabetes Mellitus and the Risks of Overall and Type-Specific Cardiovascular Diseases: A Population- and Sibling-Matched Cohort Study. *Diabetes Care.* 2021;45(1):151-9.
4. Moholdt T, Hawley JA. Maternal Lifestyle Interventions: Targeting Preconception Health. *Trends Endocrinol Metab.* 2020;31(8):561-9.
5. Vinter CA, Tanvig MH, Christensen MH, Ovesen PG, Jørgensen JS, Andersen MS, et al. Lifestyle Intervention in Danish Obese Pregnant Women With Early Gestational Diabetes Mellitus According to WHO 2013 Criteria Does Not Change Pregnancy Outcomes: Results From the LiP (Lifestyle in Pregnancy) Study. *Diabetes Care.* 2018;41(10):2079-85.
6. Nyrrnes SA, Garnæs KK, Salvesen Ø, Timilsina AS, Moholdt T, Ingul CB. Cardiac function in newborns of obese women and the effect of exercise during pregnancy. A randomized controlled trial. *PLoS One.* 2018;13(6):e0197334.
7. Gluckman PD, Hanson MA, Buklijas T. A conceptual framework for the developmental origins of health and disease. *J Dev Orig Health Dis.* 2010;1(1):6-18.
8. Cai G-j, Sun X-x, Zhang L, Hong Q. Association between maternal body mass index and congenital heart defects in offspring: a systematic review. *American Journal of Obstetrics and Gynecology.* 2014;211(2):91-117.
9. Petropoulos A. Congenital heart disease and maternal diabetes mellitus. *Евразийский Журнал Клинических Наук.* 2018;1(3):32-9.
10. Lowe WL, Lowe LP, Kuang A, Catalano PM, Nodzenski M, Talbot O, et al. Maternal glucose levels during pregnancy and childhood adiposity in the Hyperglycemia and Adverse Pregnancy Outcome Follow-up Study. *Diabetologia.* 2019;62(4):598-610.
11. Tam WH, Ma RCW, Ozaki R, Li AM, Chan MHM, Yuen LY, et al. In Utero Exposure to Maternal Hyperglycemia Increases Childhood Cardiometabolic Risk in Offspring. *Diabetes Care.* 2017;40(5):679-86.
12. Grunnet LG, Hansen S, Hjort L, Madsen CM, Kampmann FB, Thuesen ACB, et al. Adiposity, Dysmetabolic Traits, and Earlier Onset of Female Puberty in Adolescent Offspring of Women With Gestational Diabetes Mellitus: A Clinical Study Within the Danish National Birth Cohort. *Diabetes Care.* 2017;40(12):1746-55.
13. Management of Diabetes in Pregnancy. *Diabetes Care.* 2017;40(Suppl 1):S114-s9.
14. Gjestland K, Bø K, Owe KM, Eberhard-Gran M. Do pregnant women follow exercise guidelines? Prevalence data among 3482 women, and prediction of low-back pain, pelvic girdle pain and depression. *Br J Sports Med.* 2013;47(8):515-20.
15. Zeanah M, Schlosser SP. Adherence to ACOG Guidelines on Exercise During Pregnancy: Effect on Pregnancy Outcome. *Journal of Obstetric, Gynecologic & Neonatal Nursing.* 1993;22(4):329-35.
16. Tieu J, Shepherd E, Middleton P, Crowther CA. Dietary advice interventions in pregnancy for preventing gestational diabetes mellitus. *Cochrane Database Syst Rev.* 2017;1(1):Cd006674.
17. Martis R, Crowther CA, Shepherd E, Alsweiler J, Downie MR, Brown J. Treatments for women with gestational diabetes mellitus: an overview of Cochrane systematic reviews. *Cochrane Database Syst Rev.* 2018;8(8):Cd012327.
18. Shepherd E, Gomersall JC, Tieu J, Han S, Crowther CA, Middleton P. Combined diet and exercise interventions for preventing gestational diabetes mellitus. *Cochrane Database Syst Rev.* 2017;11(11):Cd010443.
19. Lane M, Robker RL, Robertson SA. Parenting from before conception. *Science.* 2014;345(6198):756-60.

20. Stephenson J, Heslehurst N, Hall J, Schoenaker D, Hutchinson J, Cade JE, et al. Before the beginning: nutrition and lifestyle in the preconception period and its importance for future health. *Lancet*. 2018;391(10132):1830-41.
21. Rönö K, Stach-Lempinen B, Eriksson JG, Pöyhönen-Alho M, Klemetti MM, Roine RP, et al. Prevention of gestational diabetes with a prepregnancy lifestyle intervention - findings from a randomized controlled trial. *Int J Womens Health*. 2018;10:493-501.
22. Raab R, Michel S, Günther J, Hoffmann J, Stecher L, Hauner H. Associations between lifestyle interventions during pregnancy and childhood weight and growth: a systematic review and meta-analysis. *Int J Behav Nutr Phys Act*. 2021;18(1):8-.
23. Sparks JR, Ghildayal N, Hivert M-F, Redman LM. Lifestyle interventions in pregnancy targeting GDM prevention: looking ahead to precision medicine. *Diabetologia*. 2022;65(11):1814-24.
24. Szumilewicz A S-RR, Worska A, Piernicka M, Yu H, Pajaujiene S, et al. How to HIIT while pregnant? The protocol characteristics and effects of high intensity interval training implemented during pregnancy – A systematic review. *Baltic Journal of Health and Physical Activity*. 2022;14(1):1-16.
25. Flanagan EW, Kebbe M, Sparks JR, Redman LM. Assessment of Eating Behaviors and Perceptions of Time-Restricted Eating During Pregnancy. *J Nutr*. 2022;152(2):475-83.
26. Haganes KL, Silva CP, Eyjólfssdóttir SK, Steen S, Grindberg M, Lydersen S, et al. Time-restricted eating and exercise training improve HbA1c and body composition in women with overweight/obesity: A randomized controlled trial. *Cell Metab*. 2022;34(10):1457-71.e4.
27. Termanssen AD, Varming A, van Elst C, Bjerre N, Nørgaard O, Hempler NF, et al. Feasibility of time-restricted eating in individuals with overweight, obesity, prediabetes, or type 2 diabetes: A systematic scoping review. *Obesity (Silver Spring)*. 2023;31(6):1463-85.
28. Ravussin E, Beyl RA, Poggiogalle E, Hsia DS, Peterson CM. Early Time-Restricted Feeding Reduces Appetite and Increases Fat Oxidation But Does Not Affect Energy Expenditure in Humans. *Obesity (Silver Spring)*. 2019;27(8):1244-54.
29. Sutton EF, Beyl R, Early KS, Cefalu WT, Ravussin E, Peterson CM. Early Time-Restricted Feeding Improves Insulin Sensitivity, Blood Pressure, and Oxidative Stress Even without Weight Loss in Men with Prediabetes. *Cell Metab*. 2018;27(6):1212-21.e3.
30. Chair SY, Cai H, Cao X, Qin Y, Cheng HY, Ng MT. Intermittent Fasting in Weight Loss and Cardiometabolic Risk Reduction: A Randomized Controlled Trial. *J Nurs Res*. 2022;30(1):e185.
31. Hutchison AT, Regmi P, Manoogian ENC, Fleischer JG, Wittert GA, Panda S, et al. Time-Restricted Feeding Improves Glucose Tolerance in Men at Risk for Type 2 Diabetes: A Randomized Crossover Trial. *Obesity (Silver Spring)*. 2019;27(5):724-32.
32. Jamshed H, Beyl RA, Della Manna DL, Yang ES, Ravussin E, Peterson CM. Early Time-Restricted Feeding Improves 24-Hour Glucose Levels and Affects Markers of the Circadian Clock, Aging, and Autophagy in Humans. *Nutrients*. 2019;11(6).
33. Wilkinson MJ, Manoogian ENC, Zadourian A, Lo H, Fakhouri S, Shoghi A, et al. Ten-Hour Time-Restricted Eating Reduces Weight, Blood Pressure, and Atherogenic Lipids in Patients with Metabolic Syndrome. *Cell Metab*. 2020;31(1):92-104.e5.
34. Andriessen C, Fealy CE, Veelen A, van Beek SMM, Roumans KHM, Connell NJ, et al. Three weeks of time-restricted eating improves glucose homeostasis in adults with type 2 diabetes but does not improve insulin sensitivity: a randomised crossover trial. *Diabetologia*. 2022;65(10):1710-20.
35. Che T, Yan C, Tian D, Zhang X, Liu X, Wu Z. Time-restricted feeding improves blood glucose and insulin sensitivity in overweight patients with type 2 diabetes: a randomised controlled trial. *Nutr Metab (Lond)*. 2021;18(1):88.
36. Parr EB, Devlin BL, Lim KHC, Moresi LNZ, Geils C, Brennan L, et al. Time-Restricted Eating as a Nutrition Strategy for Individuals with Type 2 Diabetes: A Feasibility Study. *Nutrients*. 2020;12(11).
37. Loy SL, Chan JK, Wee PH, Colega MT, Cheung YB, Godfrey KM, et al. Maternal Circadian Eating Time and Frequency Are Associated with Blood Glucose Concentrations during Pregnancy. *J Nutr*. 2017;147(1):70-7.

- 1
  - 2
  - 3
  - 4
  - 5
  - 6
  - 7
  - 8
  - 9
  - 10
  - 11
  - 12
  - 13
  - 14
  - 15
  - 16
  - 17
  - 18
  - 19
  - 20
  - 21
  - 22
  - 23
  - 24
  - 25
  - 26
  - 27
  - 28
  - 29
  - 30
  - 31
  - 32
  - 33
  - 34
  - 35
  - 36
  - 37
  - 38
  - 39
  - 40
  - 41
  - 42
  - 43
  - 44
  - 45
  - 46
  - 47
  - 48
  - 49
  - 50
  - 51
  - 52
  - 53
  - 54
  - 55
  - 56
  - 57
  - 58
  - 59
  - 60
38. Wowdzia JB, Hazell TJ, Davenport MH. Glycemic response to acute high-intensity interval versus moderate-intensity continuous exercise during pregnancy. *Physiol Rep*. 2022;10(18):e15454.
39. Szumilewicz A, Santos-Rocha R, Worska A, Piernicka M, Yu H, Pajaujiene S, et al. How to HIIT while pregnant? The protocol characteristics and effects of high intensity interval training implemented during pregnancy: A systematic review. *Baltic journal of health and physical activity*. 2022;14(1):1-16.
40. Yu H, Santos-Rocha R, Radzimiński Ł, Jastrzębski Z, Bonisławska I, Szwarc A, et al. Effects of 8-Week Online, Supervised High-Intensity Interval Training on the Parameters Related to the Anaerobic Threshold, Body Weight, and Body Composition during Pregnancy: A Randomized Controlled Trial. *Nutrients*. 2022;14(24):5279.
41. Wowdzia J, Hazell T, Vanden Berg E, Labrecque L, Brassard P, Davenport M. Maternal and Fetal Cardiovascular Responses to Acute High-Intensity Interval and Moderate-Intensity Continuous Training Exercise During Pregnancy: A Randomized Crossover Trial. *Sports Medicine*. 2023:1-15.
42. Gaston A, Cramp A. Exercise during pregnancy: a review of patterns and determinants. *J Sci Med Sport*. 2011;14(4):299-305.
43. Tobias DK, Zhang C, Chavarro J, Bowers K, Rich-Edwards J, Rosner B, et al. Prepregnancy adherence to dietary patterns and lower risk of gestational diabetes mellitus. *The American Journal of Clinical Nutrition*. 2012;96(2):289-95.
44. Gao X, Zheng Q, Jiang X, Chen X, Liao Y, Pan Y. The effect of diet quality on the risk of developing gestational diabetes mellitus: A systematic review and meta-analysis. *Frontiers in Public Health*. 2023;10.
45. Yong HY, Mohd Shariff Z, Mohd Yusof BN, Rejali Z, Appannah G, Bindels J, et al. The association between dietary patterns before and in early pregnancy and the risk of gestational diabetes mellitus (GDM): Data from the Malaysian SECOST cohort. *PLoS One*. 2020;15(1):e0227246.
46. Chan AW, Tetzlaff JM, Gøtzsche PC, Altman DG, Mann H, Berlin JA, et al. SPIRIT 2013 explanation and elaboration: guidance for protocols of clinical trials. *Bmj*. 2013;346:e7586.
47. Nes BM, Gutvik CR, Lavie CJ, Nauman J, Wisløff U. Personalized Activity Intelligence (PAI) for Prevention of Cardiovascular Disease and Promotion of Physical Activity. *Am J Med*. 2017;130(3):328-36.
48. Zisko N, Skjerve KN, Tari AR, Sandbakk SB, Wisløff U, Nes BM, et al. Personal Activity Intelligence (PAI), Sedentary Behavior and Cardiovascular Risk Factor Clustering - the HUNT Study. *Prog Cardiovasc Dis*. 2017;60(1):89-95.
49. World Health O. Diagnostic criteria and classification of hyperglycaemia first detected in pregnancy. Geneva: World Health Organization; 2013 2013. Contract No.: WHO/NMH/MND/13.2.
50. Matthews DR, Hosker JP, Rudenski AS, Naylor BA, Treacher DF, Turner RC. Homeostasis model assessment: insulin resistance and  $\beta$ -cell function from fasting plasma glucose and insulin concentrations in man. *Diabetologia*. 1985;28(7):412-9.
51. Gutt M, Davis CL, Spitzer SB, Llabre MM, Kumar M, Czarnecki EM, et al. Validation of the insulin sensitivity index (ISI(0,120)): comparison with other measures. *Diabetes Res Clin Pract*. 2000;47(3):177-84.
52. Phillips DI, Clark PM, Hales CN, Osmond C. Understanding oral glucose tolerance: comparison of glucose or insulin measurements during the oral glucose tolerance test with specific measurements of insulin resistance and insulin secretion. *Diabet Med*. 1994;11(3):286-92.
53. Stumvoll M, Mitrakou A, Pimenta W, Jenssen T, Yki-Järvinen H, Van Haeften T, et al. Use of the oral glucose tolerance test to assess insulin release and insulin sensitivity. *Diabetes Care*. 2000;23(3):295-301.
54. Most J, Marlatt KL, Altazan AD, Redman LM. Advances in assessing body composition during pregnancy. *Eur J Clin Nutr*. 2018;72(5):645-56.
55. Berglund IJ, Sørås SE, Relling BE, Lundgren KM, Kiel IA, Moholdt T. The relationship between maximum heart rate in a cardiorespiratory fitness test and in a maximum heart rate test. *J Sci Med Sport*. 2019;22(5):607-10.



- 1  
2  
3 56. Craig CL, Marshall AL, Sjöström M, Bauman AE, Booth ML, Ainsworth BE, et al. International  
4 physical activity questionnaire: 12-country reliability and validity. *Med Sci Sports Exerc.*  
5 2003;35(8):1381-95.  
6  
7 57. Buysse DJ, Reynolds CF, 3rd, Monk TH, Berman SR, Kupfer DJ. The Pittsburgh Sleep Quality  
8 Index: a new instrument for psychiatric practice and research. *Psychiatry Res.* 1989;28(2):193-213.  
9 58. Grossi E, Compare A. Psychological General Well-Being Index (PGWB). In: Michalos AC, editor.  
10 *Encyclopedia of Quality of Life and Well-Being Research.* Dordrecht: Springer Netherlands; 2014. p.  
11 5152-6.  
12 59. Adan A, Almirall H. Horne & Östberg Morningness–Eveningness questionnaire: A reduced  
13 scale. *Personality and Individual Differences.* 1991;12:241-53.  
14 60. Nyrnes SA, Fadnes S, Wigen MS, Mertens L, Lovstakken L. Blood Speckle-Tracking Based on  
15 High-Frame Rate Ultrasound Imaging in Pediatric Cardiology. *J Am Soc Echocardiogr.* 2020;33(4):493-  
16 503.e5.  
17 61. Sørensen K, Fadnes S, Mertens L, Henry M, Segers P, Løvstakken L, et al. Assessment of Early  
18 Diastolic Intraventricular Pressure Difference in Children by Blood Speckle-Tracking Echocardiography.  
19 *J Am Soc Echocardiogr.* 2023.  
20 62. Salles S, Lovstakken L, Aase SA, Bjastad TG, Torp H. Clutter Filter Wave Imaging. *IEEE Trans*  
21 *Ultrason Ferroelectr Freq Control.* 2019;66(9):1444-52.  
22 63. Metzger BE, Lowe LP, Dyer AR, Trimble ER, Chaovarindr U, Coustan DR, et al. Hyperglycemia  
23 and adverse pregnancy outcomes. *N Engl J Med.* 2008;358(19):1991-2002.  
24 64. Mikkelsen EM, Riis AH, Wise LA, Hatch EE, Rothman KJ, Sørensen HT. Pre-gravid oral  
25 contraceptive use and time to pregnancy: a Danish prospective cohort study. *Hum Reprod.*  
26 2013;28(5):1398-405.  
27 65. J T, L B, T H, J R, M W, M H. Different ways to estimate treatment effects in randomised  
28 controlled trials. *Contemp Clin Trials Commun.* 2018;10:80-5.  
29 66. Barker M, Dombrowski SU, Colbourn T, Fall CHD, Kriznik NM, Lawrence WT, et al. Intervention  
30 strategies to improve nutrition and health behaviours before conception. *Lancet (London, England).*  
31 2018;391(10132):1853-64.  
32 67. Ma RCW, Popkin BM. Intergenerational diabetes and obesity—A cycle to break? *PLOS*  
33 *Medicine.* 2017;14(10):e1002415.  
34  
35  
36  
37  
38  
39  
40  
41  
42  
43  
44

## 45 **FIGURE LEGENDS**

### 46 **Figure 1. Consort flow diagram of the BEFORE THE BEGINNING trial** 47 **(Ongoing study: status 25.09.2020 – 17.07.2023)**

48 \* If the participants are not pregnant within 12 months of inclusion, they are excluded from the  
49 study. From December 2022, the time-window for exclusion if not pregnant was reduced from  
50 12 to 6 months.  
51  
52  
53  
54  
55  
56  
57  
58

### 59 **Figure 2. Overview of time-points for assessments in the trial.**

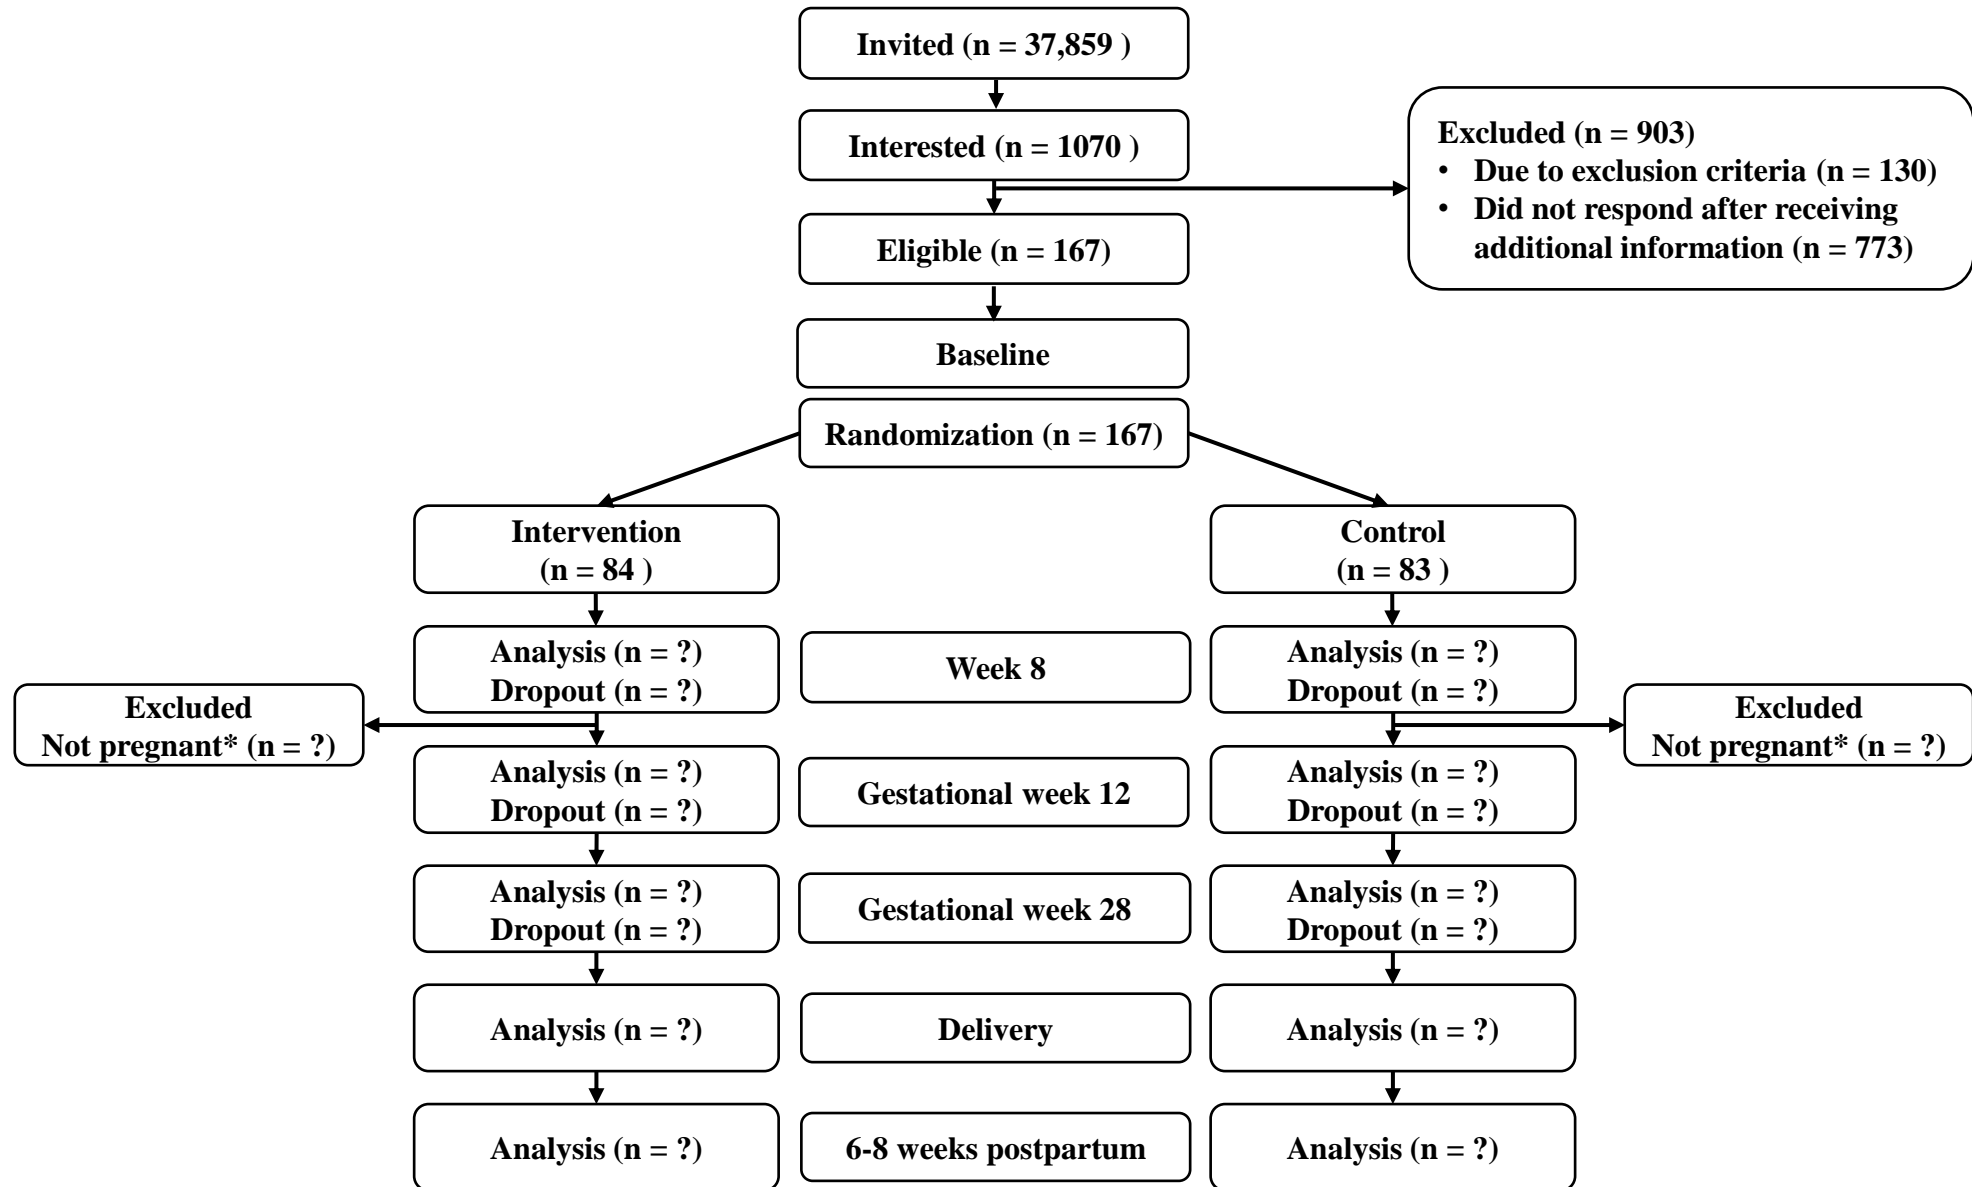

1  
2  
3  
4  
5  
6  
7  
8  
9  
10  
11  
12  
13  
14  
15  
16  
17  
18  
19  
20  
21  
22  
23  
24  
25  
26  
27  
28  
29  
30  
31  
32  
33  
34  
35  
36  
37  
38  
39  
40  
41

**Weeks**



**Every 8 weeks following visit 1: Food diary (4-day registration), hunger/appetite registration, time-window of energy intake, questionnaires (physical activity, sleep, psychological well-being).**

# Reporting checklist for protocol of a clinical trial.

Based on the SPIRIT guidelines.

## Instructions to authors

Complete this checklist by entering the page numbers from your manuscript where readers will find each of the items listed below.

Your article may not currently address all the items on the checklist. Please modify your text to include the missing information. If you are certain that an item does not apply, please write "n/a" and provide a short explanation.

Upload your completed checklist as an extra file when you submit to a journal.

In your methods section, say that you used the SPIRIT reporting guidelines, and cite them as:

Chan A-W, Tetzlaff JM, Gøtzsche PC, Altman DG, Mann H, Berlin J, Dickersin K, Hróbjartsson A, Schulz KF, Parulekar WR, Krleža-Jerić K, Laupacis A, Moher D. SPIRIT 2013 Explanation and Elaboration: Guidance for protocols of clinical trials. *BMJ*. 2013;346:e7586

|                                   | Reporting Item                                                                                                                  | Page Number |
|-----------------------------------|---------------------------------------------------------------------------------------------------------------------------------|-------------|
| <b>Administrative information</b> |                                                                                                                                 |             |
| Title                             | <a href="#">#1</a> Descriptive title identifying the study design, population, interventions, and, if applicable, trial acronym | 1           |
| Trial registration                | <a href="#">#2a</a> Trial identifier and registry name. If not                                                                  | 2           |

|    |                     |                                                                |                   |
|----|---------------------|----------------------------------------------------------------|-------------------|
| 1  |                     | yet registered, name of intended registry                      |                   |
| 2  |                     |                                                                |                   |
| 3  |                     |                                                                |                   |
| 4  | Trial registration: | <a href="#">#2b</a> All items from the World Health            | n/a               |
| 5  |                     |                                                                |                   |
| 6  | data set            | Organization Trial Registration Data Set                       |                   |
| 7  |                     |                                                                |                   |
| 8  |                     |                                                                |                   |
| 9  | Protocol version    | <a href="#">#3</a> Date and version identifier                 | n/a, see appendix |
| 10 |                     |                                                                |                   |
| 11 |                     |                                                                |                   |
| 12 | Funding             | <a href="#">#4</a> Sources and types of financial, material,   | 16                |
| 13 |                     |                                                                |                   |
| 14 |                     | and other support                                              |                   |
| 15 |                     |                                                                |                   |
| 16 |                     |                                                                |                   |
| 17 | Roles and           | <a href="#">#5a</a> Names, affiliations, and roles of protocol | 1, 15             |
| 18 |                     |                                                                |                   |
| 19 | responsibilities:   | contributors                                                   |                   |
| 20 |                     |                                                                |                   |
| 21 | contributorship     |                                                                |                   |
| 22 |                     |                                                                |                   |
| 23 |                     |                                                                |                   |
| 24 |                     |                                                                |                   |
| 25 | Roles and           | <a href="#">#5b</a> Name and contact information for the trial | n/a, see appendix |
| 26 |                     |                                                                |                   |
| 27 | responsibilities:   | sponsor                                                        |                   |
| 28 |                     |                                                                |                   |
| 29 | sponsor contact     |                                                                |                   |
| 30 |                     |                                                                |                   |
| 31 | information         |                                                                |                   |
| 32 |                     |                                                                |                   |
| 33 |                     |                                                                |                   |
| 34 |                     |                                                                |                   |
| 35 | Roles and           | <a href="#">#5c</a> Role of study sponsor and funders, if      | 16                |
| 36 |                     |                                                                |                   |
| 37 | responsibilities:   | any, in study design; collection,                              |                   |
| 38 |                     |                                                                |                   |
| 39 | sponsor and funder  | management, analysis, and interpretation                       |                   |
| 40 |                     |                                                                |                   |
| 41 |                     | of data; writing of the report; and the                        |                   |
| 42 |                     |                                                                |                   |
| 43 |                     | decision to submit the report for                              |                   |
| 44 |                     |                                                                |                   |
| 45 |                     | publication, including whether they will                       |                   |
| 46 |                     |                                                                |                   |
| 47 |                     | have ultimate authority over any of these                      |                   |
| 48 |                     |                                                                |                   |
| 49 |                     | activities                                                     |                   |
| 50 |                     |                                                                |                   |
| 51 |                     |                                                                |                   |
| 52 |                     |                                                                |                   |
| 53 |                     |                                                                |                   |
| 54 | Roles and           | <a href="#">#5d</a> Composition, roles, and responsibilities   | n/a               |
| 55 |                     |                                                                |                   |
| 56 | responsibilities:   | of the coordinating centre, steering                           |                   |
| 57 |                     |                                                                |                   |
| 58 |                     |                                                                |                   |
| 59 |                     |                                                                |                   |
| 60 |                     |                                                                |                   |

1 committees  
 2  
 3 committee, endpoint adjudication  
 4  
 5 committee, data management team, and  
 6  
 7 other individuals or groups overseeing  
 8  
 9 the trial, if applicable (see Item 21a for  
 10  
 11 data monitoring committee)  
 12

## 13 Introduction

14  
 15  
 16 Background and [#6a](#) Description of research question and 4-5  
 17  
 18 rationale justification for undertaking the trial,  
 19  
 20 including summary of relevant studies  
 21  
 22 (published and unpublished) examining  
 23  
 24 benefits and harms for each intervention  
 25  
 26

27  
 28 Background and [#6b](#) Explanation for choice of comparators 4  
 29  
 30 rationale: choice of  
 31  
 32 comparators  
 33  
 34

35 Objectives [#7](#) Specific objectives or hypotheses 5  
 36  
 37

38 Trial design [#8](#) Description of trial design including type 5  
 39  
 40 of trial (eg, parallel group, crossover,  
 41  
 42 factorial, single group), allocation ratio,  
 43  
 44 and framework (eg, superiority,  
 45  
 46 equivalence, non-inferiority, exploratory)  
 47  
 48  
 49

## 50 Methods:

51  
 52  
 53 Participants,  
 54  
 55 interventions, and  
 56  
 57 outcomes  
 58  
 59  
 60

|    |                      |                      |                                            |                   |
|----|----------------------|----------------------|--------------------------------------------|-------------------|
| 1  | Study setting        | <a href="#">#9</a>   | Description of study settings (eg,         | 5,6               |
| 2  |                      |                      | community clinic, academic hospital) and   |                   |
| 3  |                      |                      | list of countries where data will be       |                   |
| 4  |                      |                      | collected. Reference to where list of      |                   |
| 5  |                      |                      | study sites can be obtained                |                   |
| 6  |                      |                      |                                            |                   |
| 7  |                      |                      |                                            |                   |
| 8  |                      |                      |                                            |                   |
| 9  |                      |                      |                                            |                   |
| 10 |                      |                      |                                            |                   |
| 11 |                      |                      |                                            |                   |
| 12 |                      |                      |                                            |                   |
| 13 | Eligibility criteria | <a href="#">#10</a>  | Inclusion and exclusion criteria for       | 6 (Box 1)         |
| 14 |                      |                      | participants. If applicable, eligibility   |                   |
| 15 |                      |                      | criteria for study centres and individuals |                   |
| 16 |                      |                      | who will perform the interventions (eg,    |                   |
| 17 |                      |                      | surgeons, psychotherapists)                |                   |
| 18 |                      |                      |                                            |                   |
| 19 |                      |                      |                                            |                   |
| 20 |                      |                      |                                            |                   |
| 21 |                      |                      |                                            |                   |
| 22 |                      |                      |                                            |                   |
| 23 |                      |                      |                                            |                   |
| 24 |                      |                      |                                            |                   |
| 25 | Interventions:       | <a href="#">#11a</a> | Interventions for each group with          | 7                 |
| 26 | description          |                      | sufficient detail to allow replication,    |                   |
| 27 |                      |                      | including how and when they will be        |                   |
| 28 |                      |                      | administered                               |                   |
| 29 |                      |                      |                                            |                   |
| 30 |                      |                      |                                            |                   |
| 31 |                      |                      |                                            |                   |
| 32 |                      |                      |                                            |                   |
| 33 |                      |                      |                                            |                   |
| 34 |                      |                      |                                            |                   |
| 35 | Interventions:       | <a href="#">#11b</a> | Criteria for discontinuing or modifying    | n/a, see appendix |
| 36 | modifications        |                      | allocated interventions for a given trial  |                   |
| 37 |                      |                      | participant (eg, drug dose change in       |                   |
| 38 |                      |                      | response to harms, participant request,    |                   |
| 39 |                      |                      | or improving / worsening disease)          |                   |
| 40 |                      |                      |                                            |                   |
| 41 |                      |                      |                                            |                   |
| 42 |                      |                      |                                            |                   |
| 43 |                      |                      |                                            |                   |
| 44 |                      |                      |                                            |                   |
| 45 |                      |                      |                                            |                   |
| 46 |                      |                      |                                            |                   |
| 47 | Interventions:       | <a href="#">#11c</a> | Strategies to improve adherence to         | 11                |
| 48 | adherence            |                      | intervention protocols, and any            |                   |
| 49 |                      |                      | procedures for monitoring adherence        |                   |
| 50 |                      |                      | (eg, drug tablet return; laboratory tests) |                   |
| 51 |                      |                      |                                            |                   |
| 52 |                      |                      |                                            |                   |
| 53 |                      |                      |                                            |                   |
| 54 |                      |                      |                                            |                   |
| 55 |                      |                      |                                            |                   |
| 56 |                      |                      |                                            |                   |
| 57 | Interventions:       | <a href="#">#11d</a> | Relevant concomitant care and              | 7                 |
| 58 |                      |                      |                                            |                   |
| 59 |                      |                      |                                            |                   |
| 60 |                      |                      |                                            |                   |

|    |                      |                     |                                          |              |
|----|----------------------|---------------------|------------------------------------------|--------------|
| 1  | concomitant care     |                     | interventions that are permitted or      |              |
| 2  |                      |                     | prohibited during the trial              |              |
| 3  |                      |                     |                                          |              |
| 4  |                      |                     |                                          |              |
| 5  |                      |                     |                                          |              |
| 6  | Outcomes             | <a href="#">#12</a> | Primary, secondary, and other outcomes,  | 8-11         |
| 7  |                      |                     | including the specific measurement       |              |
| 8  |                      |                     | variable (eg, systolic blood pressure),  |              |
| 9  |                      |                     | analysis metric (eg, change from         |              |
| 10 |                      |                     | baseline, final value, time to event),   |              |
| 11 |                      |                     | method of aggregation (eg, median,       |              |
| 12 |                      |                     | proportion), and time point for each     |              |
| 13 |                      |                     | outcome. Explanation of the clinical     |              |
| 14 |                      |                     | relevance of chosen efficacy and harm    |              |
| 15 |                      |                     | outcomes is strongly recommended         |              |
| 16 |                      |                     |                                          |              |
| 17 |                      |                     |                                          |              |
| 18 |                      |                     |                                          |              |
| 19 |                      |                     |                                          |              |
| 20 |                      |                     |                                          |              |
| 21 |                      |                     |                                          |              |
| 22 |                      |                     |                                          |              |
| 23 |                      |                     |                                          |              |
| 24 |                      |                     |                                          |              |
| 25 |                      |                     |                                          |              |
| 26 |                      |                     |                                          |              |
| 27 |                      |                     |                                          |              |
| 28 |                      |                     |                                          |              |
| 29 | Participant timeline | <a href="#">#13</a> | Time schedule of enrolment,              | 7 (Figure 1) |
| 30 |                      |                     | interventions (including any run-ins and |              |
| 31 |                      |                     | washouts), assessments, and visits for   |              |
| 32 |                      |                     | participants. A schematic diagram is     | 7 (Figure 2) |
| 33 |                      |                     | highly recommended (see Figure)          |              |
| 34 |                      |                     |                                          |              |
| 35 |                      |                     |                                          |              |
| 36 |                      |                     |                                          |              |
| 37 |                      |                     |                                          |              |
| 38 |                      |                     |                                          |              |
| 39 |                      |                     |                                          |              |
| 40 |                      |                     |                                          |              |
| 41 | Sample size          | <a href="#">#14</a> | Estimated number of participants needed  | 12           |
| 42 |                      |                     | to achieve study objectives and how it   |              |
| 43 |                      |                     | was determined, including clinical and   |              |
| 44 |                      |                     | statistical assumptions supporting any   |              |
| 45 |                      |                     | sample size calculations                 |              |
| 46 |                      |                     |                                          |              |
| 47 |                      |                     |                                          |              |
| 48 |                      |                     |                                          |              |
| 49 |                      |                     |                                          |              |
| 50 |                      |                     |                                          |              |
| 51 |                      |                     |                                          |              |
| 52 |                      |                     |                                          |              |
| 53 | Recruitment          | <a href="#">#15</a> | Strategies for achieving adequate        | 7            |
| 54 |                      |                     | participant enrolment to reach target    |              |
| 55 |                      |                     | sample size                              |              |
| 56 |                      |                     |                                          |              |
| 57 |                      |                     |                                          |              |
| 58 |                      |                     |                                          |              |
| 59 |                      |                     |                                          |              |
| 60 |                      |                     |                                          |              |



1 **Methods: Assignment**

2  
3 **of interventions (for**

4  
5 **controlled trials)**

|                                                                                                                                          |                                        |                      |                                                                                                                                                                                                                                                                                                                                                                                  |    |
|------------------------------------------------------------------------------------------------------------------------------------------|----------------------------------------|----------------------|----------------------------------------------------------------------------------------------------------------------------------------------------------------------------------------------------------------------------------------------------------------------------------------------------------------------------------------------------------------------------------|----|
| 6<br>7<br>8<br>9<br>10<br>11<br>12<br>13<br>14<br>15<br>16<br>17<br>18<br>19<br>20<br>21<br>22<br>23<br>24<br>25<br>26<br>27<br>28<br>29 | Allocation: sequence<br>generation     | <a href="#">#16a</a> | Method of generating the allocation<br>sequence (eg, computer-generated<br>random numbers), and list of any factors<br>for stratification. To reduce predictability<br>of a random sequence, details of any<br>planned restriction (eg, blocking) should<br>be provided in a separate document that<br>is unavailable to those who enrol<br>participants or assign interventions | 7  |
| 30<br>31<br>32<br>33<br>34<br>35<br>36<br>37<br>38<br>39<br>40<br>41<br>42<br>43                                                         | Allocation<br>concealment<br>mechanism | <a href="#">#16b</a> | Mechanism of implementing the<br>allocation sequence (eg, central<br>telephone; sequentially numbered,<br>opaque, sealed envelopes), describing<br>any steps to conceal the sequence until<br>interventions are assigned                                                                                                                                                         | 7  |
| 44<br>45<br>46<br>47<br>48<br>49<br>50<br>51<br>52<br>53                                                                                 | Allocation:<br>implementation          | <a href="#">#16c</a> | Who will generate the allocation<br>sequence, who will enrol participants,<br>and who will assign participants to<br>interventions                                                                                                                                                                                                                                               | 7  |
| 54<br>55<br>56<br>57<br>58<br>59<br>60                                                                                                   | Blinding (masking)                     | <a href="#">#17a</a> | Who will be blinded after assignment to<br>interventions (eg, trial participants, care                                                                                                                                                                                                                                                                                           | 13 |

1 providers, outcome assessors, data

2 analysts), and how

3  
4  
5  
6 Blinding (masking): [#17b](#) If blinded, circumstances under which n/a: no blinding  
7  
8 emergency unblinding is permissible, and procedure  
9  
10 unblinding for revealing a participant's allocated  
11  
12 intervention during the trial  
13  
14

15 **Methods: Data**

16 **collection,**

17 **management, and**

18 **analysis**

19  
20  
21  
22  
23  
24  
25 Data collection plan [#18a](#) Plans for assessment and collection of 7-11  
26  
27 outcome, baseline, and other trial data,  
28  
29 including any related processes to  
30  
31 promote data quality (eg, duplicate  
32  
33 measurements, training of assessors)  
34  
35 and a description of study instruments  
36  
37 (eg, questionnaires, laboratory tests)  
38  
39 along with their reliability and validity, if  
40  
41 known. Reference to where data  
42  
43 collection forms can be found, if not in  
44  
45 the protocol  
46  
47  
48  
49

50  
51 Data collection plan: [#18b](#) Plans to promote participant retention 12  
52  
53 retention and complete follow-up, including list of  
54  
55 any outcome data to be collected for  
56  
57 participants who discontinue or deviate  
58  
59

|    |                            |                                                                 |                   |
|----|----------------------------|-----------------------------------------------------------------|-------------------|
| 1  |                            | from intervention protocols                                     |                   |
| 2  |                            |                                                                 |                   |
| 3  |                            |                                                                 |                   |
| 4  | Data management            | <a href="#">#19</a> Plans for data entry, coding, security,     | 14                |
| 5  |                            | and storage, including any related                              |                   |
| 6  |                            | processes to promote data quality (eg,                          |                   |
| 7  |                            | double data entry; range checks for data                        |                   |
| 8  |                            | values). Reference to where details of                          |                   |
| 9  |                            | data management procedures can be                               |                   |
| 10 |                            | found, if not in the protocol                                   |                   |
| 11 |                            |                                                                 |                   |
| 12 |                            |                                                                 |                   |
| 13 |                            |                                                                 |                   |
| 14 |                            |                                                                 |                   |
| 15 |                            |                                                                 |                   |
| 16 |                            |                                                                 |                   |
| 17 |                            |                                                                 |                   |
| 18 |                            |                                                                 |                   |
| 19 |                            |                                                                 |                   |
| 20 | Statistics: outcomes       | <a href="#">#20a</a> Statistical methods for analysing primary  | 13                |
| 21 |                            | and secondary outcomes. Reference to                            |                   |
| 22 |                            | where other details of the statistical                          |                   |
| 23 |                            | analysis plan can be found, if not in the                       |                   |
| 24 |                            | protocol                                                        |                   |
| 25 |                            |                                                                 |                   |
| 26 |                            |                                                                 |                   |
| 27 |                            |                                                                 |                   |
| 28 |                            |                                                                 |                   |
| 29 |                            |                                                                 |                   |
| 30 |                            |                                                                 |                   |
| 31 |                            |                                                                 |                   |
| 32 | Statistics: additional     | <a href="#">#20b</a> Methods for any additional analyses (eg,   | 13                |
| 33 | analyses                   | subgroup and adjusted analyses)                                 |                   |
| 34 |                            |                                                                 |                   |
| 35 |                            |                                                                 |                   |
| 36 |                            |                                                                 |                   |
| 37 |                            |                                                                 |                   |
| 38 | Statistics: analysis       | <a href="#">#20c</a> Definition of analysis population relating | 13                |
| 39 | population and             | to protocol non-adherence (eg, as                               |                   |
| 40 | missing data               | randomised analysis), and any statistical                       |                   |
| 41 |                            | methods to handle missing data (eg,                             |                   |
| 42 |                            | multiple imputation)                                            |                   |
| 43 |                            |                                                                 |                   |
| 44 |                            |                                                                 |                   |
| 45 |                            |                                                                 |                   |
| 46 |                            |                                                                 |                   |
| 47 |                            |                                                                 |                   |
| 48 |                            |                                                                 |                   |
| 49 |                            |                                                                 |                   |
| 50 | <b>Methods: Monitoring</b> |                                                                 |                   |
| 51 |                            |                                                                 |                   |
| 52 |                            |                                                                 |                   |
| 53 | Data monitoring:           | <a href="#">#21a</a> Composition of data monitoring             | n/a, see appendix |
| 54 | formal committee           | committee (DMC); summary of its role                            |                   |
| 55 |                            | and reporting structure; statement of                           |                   |
| 56 |                            |                                                                 |                   |
| 57 |                            |                                                                 |                   |
| 58 |                            |                                                                 |                   |
| 59 |                            |                                                                 |                   |
| 60 |                            |                                                                 |                   |

1 whether it is independent from the  
 2 sponsor and competing interests; and  
 3  
 4 reference to where further details about  
 5  
 6 its charter can be found, if not in the  
 7  
 8 protocol. Alternatively, an explanation of  
 9  
 10 why a DMC is not needed  
 11  
 12  
 13  
 14

|                                                 |                      |                                                                                                                                                                                                                                                     |                   |
|-------------------------------------------------|----------------------|-----------------------------------------------------------------------------------------------------------------------------------------------------------------------------------------------------------------------------------------------------|-------------------|
| 15 Data monitoring:<br>16 interim analysis      | <a href="#">#21b</a> | Description of any interim analyses and<br>17 stopping guidelines, including who will<br>18 have access to these interim results and<br>19 make the final decision to terminate the<br>20 trial<br>21<br>22<br>23<br>24                             | n/a               |
| 27 Harms                                        | <a href="#">#22</a>  | Plans for collecting, assessing, reporting,<br>28 and managing solicited and<br>29 spontaneously reported adverse events<br>30 and other unintended effects of trial<br>31 interventions or trial conduct<br>32<br>33<br>34<br>35<br>36<br>37<br>38 | 13                |
| 39 Auditing                                     | <a href="#">#23</a>  | Frequency and procedures for auditing<br>40 trial conduct, if any, and whether the<br>41 process will be independent from<br>42 investigators and the sponsor<br>43<br>44<br>45<br>46<br>47<br>48                                                   | n/a, see appendix |
| 49 <b>Ethics and</b><br>50 <b>dissemination</b> |                      |                                                                                                                                                                                                                                                     |                   |
| 54 Research ethics<br>55 approval               | <a href="#">#24</a>  | Plans for seeking research ethics<br>56 committee / institutional review board<br>57<br>58                                                                                                                                                          | 14                |

|    |                    |                                                              |       |
|----|--------------------|--------------------------------------------------------------|-------|
| 1  |                    | (REC / IRB) approval                                         |       |
| 2  |                    |                                                              |       |
| 3  |                    |                                                              |       |
| 4  | Protocol           | <a href="#">#25</a> Plans for communicating important        | 11-12 |
| 5  |                    |                                                              |       |
| 6  | amendments         | protocol modifications (eg, changes to                       |       |
| 7  |                    | eligibility criteria, outcomes, analyses) to                 |       |
| 8  |                    | relevant parties (eg, investigators, REC /                   |       |
| 9  |                    | IRBs, trial participants, trial registries,                  |       |
| 10 |                    | journals, regulators)                                        |       |
| 11 |                    |                                                              |       |
| 12 |                    |                                                              |       |
| 13 |                    |                                                              |       |
| 14 |                    |                                                              |       |
| 15 |                    |                                                              |       |
| 16 |                    |                                                              |       |
| 17 |                    |                                                              |       |
| 18 | Consent or assent  | <a href="#">#26a</a> Who will obtain informed consent or     | 13    |
| 19 |                    | assent from potential trial participants or                  |       |
| 20 |                    | authorised surrogates, and how (see                          |       |
| 21 |                    | Item 32)                                                     |       |
| 22 |                    |                                                              |       |
| 23 |                    |                                                              |       |
| 24 |                    |                                                              |       |
| 25 |                    |                                                              |       |
| 26 |                    |                                                              |       |
| 27 |                    |                                                              |       |
| 28 | Consent or assent: | <a href="#">#26b</a> Additional consent provisions for       | 14    |
| 29 | ancillary studies  | collection and use of participant data and                   |       |
| 30 |                    | biological specimens in ancillary studies,                   |       |
| 31 |                    | if applicable                                                |       |
| 32 |                    |                                                              |       |
| 33 |                    |                                                              |       |
| 34 |                    |                                                              |       |
| 35 |                    |                                                              |       |
| 36 |                    |                                                              |       |
| 37 |                    |                                                              |       |
| 38 | Confidentiality    | <a href="#">#27</a> How personal information about potential | 14    |
| 39 |                    | and enrolled participants will be                            |       |
| 40 |                    | collected, shared, and maintained in                         |       |
| 41 |                    | order to protect confidentiality before,                     |       |
| 42 |                    | during, and after the trial                                  |       |
| 43 |                    |                                                              |       |
| 44 |                    |                                                              |       |
| 45 |                    |                                                              |       |
| 46 |                    |                                                              |       |
| 47 |                    |                                                              |       |
| 48 |                    |                                                              |       |
| 49 |                    |                                                              |       |
| 50 | Declaration of     | <a href="#">#28</a> Financial and other competing interests  | 16    |
| 51 | interests          | for principal investigators for the overall                  |       |
| 52 |                    | trial and each study site                                    |       |
| 53 |                    |                                                              |       |
| 54 |                    |                                                              |       |
| 55 |                    |                                                              |       |
| 56 |                    |                                                              |       |
| 57 | Data access        | <a href="#">#29</a> Statement of who will have access to the | 14    |
| 58 |                    |                                                              |       |
| 59 |                    |                                                              |       |
| 60 |                    |                                                              |       |

|    |                       |                                                                 |              |
|----|-----------------------|-----------------------------------------------------------------|--------------|
| 1  |                       | final trial dataset, and disclosure of                          |              |
| 2  |                       |                                                                 |              |
| 3  |                       | contractual agreements that limit such                          |              |
| 4  |                       |                                                                 |              |
| 5  |                       | access for investigators                                        |              |
| 6  |                       |                                                                 |              |
| 7  |                       |                                                                 |              |
| 8  | Ancillary and post    | <a href="#">#30</a> Provisions, if any, for ancillary and post- | 13           |
| 9  |                       |                                                                 |              |
| 10 | trial care            | trial care, and for compensation to those                       |              |
| 11 |                       |                                                                 |              |
| 12 |                       | who suffer harm from trial participation                        |              |
| 13 |                       |                                                                 |              |
| 14 |                       |                                                                 |              |
| 15 | Dissemination policy: | <a href="#">#31a</a> Plans for investigators and sponsor to     | 14           |
| 16 |                       |                                                                 |              |
| 17 | trial results         | communicate trial results to participants,                      |              |
| 18 |                       | healthcare professionals, the public, and                       |              |
| 19 |                       | other relevant groups (eg, via publication,                     |              |
| 20 |                       | reporting in results databases, or other                        |              |
| 21 |                       | data sharing arrangements), including                           |              |
| 22 |                       | any publication restrictions                                    |              |
| 23 |                       |                                                                 |              |
| 24 |                       |                                                                 |              |
| 25 |                       |                                                                 |              |
| 26 |                       |                                                                 |              |
| 27 |                       |                                                                 |              |
| 28 |                       |                                                                 |              |
| 29 |                       |                                                                 |              |
| 30 |                       |                                                                 |              |
| 31 |                       |                                                                 |              |
| 32 | Dissemination policy: | <a href="#">#31b</a> Authorship eligibility guidelines and any  | 14           |
| 33 |                       |                                                                 |              |
| 34 | authorship            | intended use of professional writers                            |              |
| 35 |                       |                                                                 |              |
| 36 |                       |                                                                 |              |
| 37 |                       |                                                                 |              |
| 38 | Dissemination policy: | <a href="#">#31c</a> Plans, if any, for granting public access  | 14           |
| 39 |                       |                                                                 |              |
| 40 | reproducible          | to the full protocol, participant-level                         |              |
| 41 |                       | dataset, and statistical code                                   |              |
| 42 | research              |                                                                 |              |
| 43 |                       |                                                                 |              |
| 44 |                       |                                                                 |              |
| 45 | <b>Appendices</b>     |                                                                 |              |
| 46 |                       |                                                                 |              |
| 47 |                       |                                                                 |              |
| 48 | Informed consent      | <a href="#">#32</a> Model consent form and other related        | See Appendix |
| 49 |                       |                                                                 |              |
| 50 | materials             | documentation given to participants and                         |              |
| 51 |                       | authorised surrogates                                           |              |
| 52 |                       |                                                                 |              |
| 53 |                       |                                                                 |              |
| 54 |                       |                                                                 |              |
| 55 |                       |                                                                 |              |
| 56 | Biological specimens  | <a href="#">#33</a> Plans for collection, laboratory            | 8ssss-11     |
| 57 |                       |                                                                 |              |
| 58 |                       |                                                                 |              |
| 59 |                       |                                                                 |              |
| 60 |                       |                                                                 |              |

1 evaluation, and storage of biological  
2  
3 specimens for genetic or molecular  
4  
5 analysis in the current trial and for future  
6  
7 use in ancillary studies, if applicable  
8  
9

10 The SPIRIT Explanation and Elaboration paper is distributed under the terms of the Creative  
11 Commons Attribution License CC-BY-NC. This checklist was completed on 17. July 2023 using  
12  
13 <https://www.goodreports.org/>, a tool made by the [EQUATOR Network](#) in collaboration with  
14  
15 [Penelope.ai](#)  
16  
17  
18  
19  
20  
21  
22  
23  
24  
25  
26  
27  
28  
29  
30  
31  
32  
33  
34  
35  
36  
37  
38  
39  
40  
41  
42  
43  
44  
45  
46  
47  
48  
49  
50  
51  
52  
53  
54  
55  
56  
57  
58  
59  
60

# BMJ Open

## A randomised controlled trial of preconception lifestyle intervention on maternal and offspring health in people with increased risk of gestational diabetes: study protocol for the BEFORE THE BEGINNING trial

|                                 |                                                                                                                                                                                                                                                                                                                                                                                                                                                                                                                                                                                                                                                                                                                                                                                                                                                                                                                                                                                                                                                                                                                                                                                                                                                                                                                                                                                                                                                                                                                                                                                                                                                     |
|---------------------------------|-----------------------------------------------------------------------------------------------------------------------------------------------------------------------------------------------------------------------------------------------------------------------------------------------------------------------------------------------------------------------------------------------------------------------------------------------------------------------------------------------------------------------------------------------------------------------------------------------------------------------------------------------------------------------------------------------------------------------------------------------------------------------------------------------------------------------------------------------------------------------------------------------------------------------------------------------------------------------------------------------------------------------------------------------------------------------------------------------------------------------------------------------------------------------------------------------------------------------------------------------------------------------------------------------------------------------------------------------------------------------------------------------------------------------------------------------------------------------------------------------------------------------------------------------------------------------------------------------------------------------------------------------------|
| Journal:                        | <i>BMJ Open</i>                                                                                                                                                                                                                                                                                                                                                                                                                                                                                                                                                                                                                                                                                                                                                                                                                                                                                                                                                                                                                                                                                                                                                                                                                                                                                                                                                                                                                                                                                                                                                                                                                                     |
| Manuscript ID                   | bmjopen-2023-073572.R2                                                                                                                                                                                                                                                                                                                                                                                                                                                                                                                                                                                                                                                                                                                                                                                                                                                                                                                                                                                                                                                                                                                                                                                                                                                                                                                                                                                                                                                                                                                                                                                                                              |
| Article Type:                   | Protocol                                                                                                                                                                                                                                                                                                                                                                                                                                                                                                                                                                                                                                                                                                                                                                                                                                                                                                                                                                                                                                                                                                                                                                                                                                                                                                                                                                                                                                                                                                                                                                                                                                            |
| Date Submitted by the Author:   | 23-Aug-2023                                                                                                                                                                                                                                                                                                                                                                                                                                                                                                                                                                                                                                                                                                                                                                                                                                                                                                                                                                                                                                                                                                                                                                                                                                                                                                                                                                                                                                                                                                                                                                                                                                         |
| Complete List of Authors:       | Sujan, Md Abu Jafar; Norwegian University of Science and Technology, Department of Circulation and Medical Imaging; St Olavs Hospital Trondheim University Hospital, Department of Women's Health Skarstad, Hanna; Norwegian University of Science and Technology, Department of Circulation and Medical Imaging<br>Rosvold, Guro ; Norwegian University of Science and Technology, Department of Circulation and Medical Imaging<br>Fougner, Stine; St Olavs Hospital Trondheim University Hospital, Department of Endocrinology; Norwegian University of Science and Technology, Department of Clinical and Molecular Medicine<br>Nyrnes, Siri; Norwegian University of Science and Technology, Department of Circulation and Medical Imaging; St Olavs Hospital Trondheim University Hospital, Children's Clinic<br>Iversen, Ann-Charlotte; Norwegian University of Science and Technology, Department of Clinical and Molecular Medicine; Norwegian University of Science and Technology, Centre of Molecular Inflammation Research<br>Follestad, Turid; Norwegian University of Science and Technology, Department of Clinical and Molecular Medicine; St Olavs Hospital Trondheim University Hospital, Clinical Research Unit Central Norway<br>Salvesen, Kjell; St Olavs Hospital Trondheim University Hospital, Department of Women's Health; Norwegian University of Science and Technology, Department of Clinical and Molecular Medicine<br>Moholdt, Trine; Norwegian University of Science and Technology, Department of Circulation and Medical Imaging; St Olavs Hospital Trondheim University Hospital, Department of Women's Health |
| <b>Primary Subject Heading</b>: | Sports and exercise medicine                                                                                                                                                                                                                                                                                                                                                                                                                                                                                                                                                                                                                                                                                                                                                                                                                                                                                                                                                                                                                                                                                                                                                                                                                                                                                                                                                                                                                                                                                                                                                                                                                        |
| Secondary Subject Heading:      | Diabetes and endocrinology, Cardiovascular medicine                                                                                                                                                                                                                                                                                                                                                                                                                                                                                                                                                                                                                                                                                                                                                                                                                                                                                                                                                                                                                                                                                                                                                                                                                                                                                                                                                                                                                                                                                                                                                                                                 |
| Keywords:                       | Clinical Trial, Maternal medicine < OBSTETRICS, Fetal medicine < OBSTETRICS, Obesity, Diabetes in pregnancy < DIABETES & ENDOCRINOLOGY, NUTRITION & DIETETICS                                                                                                                                                                                                                                                                                                                                                                                                                                                                                                                                                                                                                                                                                                                                                                                                                                                                                                                                                                                                                                                                                                                                                                                                                                                                                                                                                                                                                                                                                       |
|                                 |                                                                                                                                                                                                                                                                                                                                                                                                                                                                                                                                                                                                                                                                                                                                                                                                                                                                                                                                                                                                                                                                                                                                                                                                                                                                                                                                                                                                                                                                                                                                                                                                                                                     |



1  
2  
3  
4  
5  
6  
7  
8  
9  
10  
11  
12  
13  
14  
15  
16  
17  
18  
19  
20  
21  
22  
23  
24  
25  
26  
27  
28  
29  
30  
31  
32  
33  
34  
35  
36  
37  
38  
39  
40  
41  
42  
43  
44  
45  
46  
47  
48  
49  
50  
51  
52  
53  
54  
55  
56  
57  
58  
59  
60



1  
2  
3 **A randomised controlled trial of preconception lifestyle intervention on maternal**  
4 **and offspring health in people with increased risk of gestational diabetes: study**  
5 **protocol for the BEFORE THE BEGINNING trial**  
6  
7  
8  
9

10  
11  
12 Sujan MAJ<sup>1,2</sup>, Skarstad HS<sup>1</sup>, Rosvold G<sup>1</sup>, Fougner SL<sup>3,4</sup>, Nyrnes SA<sup>1,5</sup>, Iversen AC<sup>3,6</sup>, Follestad  
13 T<sup>3,7</sup>, Salvesen KÅ<sup>2,3</sup>, Moholdt T<sup>1,2,\*</sup>

14  
15  
16 <sup>1</sup>Department of Circulation and Medical Imaging, Norwegian University of Science and  
17 Technology, Trondheim, Norway

18  
19 <sup>2</sup>Department of Women's Health, St. Olavs Hospital, Trondheim University Hospital,  
20 Trondheim, Norway

21  
22 <sup>3</sup>Department of Clinical and Molecular Medicine, Norwegian University of Science and  
23 Technology, Trondheim, Norway

24  
25 <sup>4</sup>Department of Endocrinology, St. Olavs Hospital, Trondheim University Hospital,  
26 Trondheim, Norway

27  
28 <sup>5</sup>Children's clinic, St. Olavs Hospital, Trondheim University Hospital, Trondheim, Norway

29  
30 <sup>6</sup>Centre of Molecular Inflammation Research, Norwegian University of Science and  
31 Technology, Trondheim, Norway

32  
33 <sup>7</sup>Clinical Research Unit Central Norway, St. Olavs Hospital, Trondheim Norway

34  
35 **\*Corresponding author**

36  
37  
38 Postal address: NTNU, Faculty of Medicine and Health Sciences, Department of Circulation  
39 and Medical Imaging, Postbox 8905, 7491 Trondheim, Norway

40  
41  
42  
43 E-mail addresses: MAJS: [md.a.j.sujan@ntnu.no](mailto:md.a.j.sujan@ntnu.no), HSS: [hanna.s.skarstad@ntnu.no](mailto:hanna.s.skarstad@ntnu.no), GR:  
44 [guro.rosvold@ntnu.no](mailto:guro.rosvold@ntnu.no), SLF: [stine.fougner@ntnu.no](mailto:stine.fougner@ntnu.no), SAN: [siri.a.nyrnes@ntnu.no](mailto:siri.a.nyrnes@ntnu.no), ACI: [ann-](mailto:ann-charlotte.iversen@ntnu.no)  
45 [charlotte.iversen@ntnu.no](mailto:charlotte.iversen@ntnu.no), TF: [turid.follestad@ntnu.no](mailto:turid.follestad@ntnu.no), KÅS: [pepe.salvesen@ntnu.no](mailto:pepe.salvesen@ntnu.no), TM:  
46 [trine.moholdt@ntnu.no](mailto:trine.moholdt@ntnu.no)  
47  
48  
49

50  
51  
52 **Word count:** 4199  
53  
54  
55  
56  
57  
58  
59  
60

## Abstract

**Introduction:** Gestational diabetes mellitus (GDM) is associated with increased risk for type 2 diabetes in the mother and cardiometabolic diseases in the child. The preconception period is an optimal window to adapt the lifestyle for improved outcomes for both mother and child. Our aim is to determine the effect of a lifestyle intervention, initiated before and continued throughout pregnancy, on maternal glucose tolerance and other maternal and infant cardiometabolic outcomes.

**Methods and analysis:** This ongoing randomised controlled trial has included 167 females aged 18-39 years old at increased risk for GDM who are contemplating pregnancy. The participants were randomly allocated 1:1 to an intervention or control group. The intervention consists of exercise (volume is set by a heart rate-based app and corresponds to  $\geq 1$  hour of weekly exercise at  $\geq 80\%$  of individual heart rate maximum), and time-restricted eating ( $\leq 10$  hours/day window of energy intake). The primary outcome measure is glucose tolerance in gestational week 28. Maternal and offspring outcomes are measured before and during pregnancy, at delivery, and at 6-8 weeks postpartum. Primary and secondary continuous outcome measures will be compared between groups based on the “intention to treat” principle using linear mixed models.

**Ethics and dissemination:** The Regional Committees for Medical and Health Research Ethics in Norway has approved the study (REK 143756). The anonymised results will be submitted for publication and posted in a publicly accessible database of clinical study results.

**Abstract word count:** 236

**Trial registration number:** Clinical trial gov NCT04585581.

**Keywords:** insulin resistance, time-restricted eating, aerobic exercise, glycaemic control, diet

### Strengths and limitations of this study

- The intervention starts before and continues throughout pregnancy to make it easier for the participants to adopt an active lifestyle before pregnancy.
- This study includes individuals at high risk of GDM from multiple ethnic backgrounds, which improves the generalisability of the findings.
- The effects of the intervention on the cardiac function and body composition of the offspring will be comprehensively evaluated.
- Due to the difficulty of blinding investigators and participants to behavioural interventions, investigators will not be blinded for outcome assessments.
- Due to the long duration of the intervention, adherence to lifestyle modifications may be difficult for some participants despite regular monitoring and motivational support.

## Introduction

The global prevalence of gestational diabetes mellitus (GDM), i.e., high plasma glucose first identified during pregnancy, continues to increase. Both environmental and genetic factors contribute to the development of GDM, and up to 14 % of live births are negatively impacted by this condition.(1) GDM typically occurs because of pancreatic  $\beta$ -cell dysfunction with pre-existing insulin resistance and increases the risk for type 2 diabetes and cardiovascular disease in the mother.(2, 3) Maternal obesity and hyperglycaemia affect the offspring through the egg cell quality, intrauterine environment, and foetal organ development. These metabolic conditions eventually increase the risk for cardiac dysfunction at birth, and early onset diabetes, obesity, and cardiovascular diseases later in life.(4-9) Higher maternal blood glucose concentration, even below the diagnostic criteria for GDM, is associated with increased birth weight, elevated levels of cord-blood C-peptide, childhood obesity, and elevated blood pressure, independent of maternal body mass index (BMI).(10-12) Besides the inheritable risk factors, epigenetic modifications in utero, low-grade inflammation, and modifications of the gut microbiome can also negatively affect the cardiometabolic health of the offspring.(4)

Lifestyle interventions, including dietary changes, increased physical activity, and self-monitoring of blood glucose, are the first-line choice for GDM management.(13) However, many pregnant individuals fail to adhere to the recommendations for diet and exercise training(14, 15) and there is inconclusive evidence for clinically meaningful effects of diet-exercise interventions on pregnancy outcomes for the mother or child.(5, 16-18) Several recent randomised controlled trials (RCTs) and reviews conclude that pre-pregnancy lifestyle interventions are urgently needed to improve maternal health and increase the likelihood of adherence to a healthy lifestyle during pregnancy.(19-23) Alternative diet-exercise strategies, such as time-restricted eating (TRE) and high-intensity interval training (HIIT), have shown promising results on improving metabolic health among reproductive-aged females.(24-26) TRE is a safe and feasible intervention in individuals with overweight, obesity, prediabetes, and type 2 diabetes.(27) It has been shown to improve glucose tolerance, and insulin sensitivity, and reduce appetite, hunger, HbA1c, and total body and fat mass in this population.(28-36) While data on the effects of TRE in pregnancy are scarce, observational data suggest that longer maternal night-fasting intervals are associated with decreased fasting glucose.(37) The safety of HIIT is not yet established during pregnancy, but recent publications indicate that HIIT is safe, with higher enjoyment and improved adherence than continuous moderate-intensity

1  
2  
3 training,(38) and may provide cardiometabolic benefits for both mothers and their  
4 offspring.(39-41)  
5

6 Pre-pregnancy patterns of physical activity and exercise are important determinants of  
7 exercise during pregnancy,(42) and pre-pregnancy inception of healthy dietary habits is  
8 associated with a lower risk of GDM.(43-45) So far, there is limited evidence on the  
9 effectiveness of implementing both dietary and exercise-based lifestyle interventions before  
10 pregnancy. It is highly relevant to find feasible and effective pre-pregnancy lifestyle  
11 interventions which can reduce maternal hyperglycaemia and its related negative consequences  
12 for mother and child.  
13  
14  
15  
16  
17  
18

19 The primary hypothesis for the BEFORE THE BEGINNING (BTB) trial is that the  
20 participants allocated to the intervention group (time-restricted eating and exercise) will have  
21 improved maternal glucose tolerance in gestational week 28, compared with participants in the  
22 control group. We will also determine the effect of the intervention on secondary  
23 cardiometabolic outcomes in both the mothers and their newborns.  
24  
25  
26  
27

## 28 **Aims**

### 29 **The primary aim of BEFORE THE BEGINNING**

- 30 • To determine the effect of a lifestyle intervention, commenced preconception and  
31 continuing throughout pregnancy, on maternal glucose tolerance in pregnancy.  
32

### 33 **Secondary aims of BEFORE THE BEGINNING**

- 34 • To evaluate the effect of the intervention on insulin sensitivity, blood glucose,  
35 circulating lipids, body composition, cardiorespiratory fitness, systemic inflammation,  
36 and blood pressure in the mothers.  
37
- 38 • To evaluate the effect of the intervention on cardiac function, body composition, and  
39 systemic inflammation in the newborns.  
40
- 41 • To evaluate the adherence to the interventions, and their effects on sleep quality,  
42 appetite and hunger, physical activity, and dietary intake.  
43  
44  
45  
46  
47  
48  
49  
50

## 51 **Methods**

### 52 **Design and study setting**

53 This is an ongoing single-centre RCT with two parallel groups: an intervention group and a  
54 control group, undertaken at the Norwegian University of Science and Technology (NTNU) in  
55  
56  
57  
58  
59  
60

Trondheim, Norway, in collaboration with the St. Olav's Hospital, Trondheim, Norway. SPIRIT reporting guidelines were used in reporting this study protocol.(46)

## Recruitment and participants

The trial was announced through social media, hospital and university webpages, local stores, and public places. Additionally, potential participants were identified through the National Population Register, and we regularly sent out electronic invitations to females aged 20-35 years in Trondheim and the surrounding area to participate in the trial. The invitation prompted them to visit the study website, which contains a short description of the trial and allows potential participants to self-screen for eligibility before further screening by telephone. The first participant was included on 25<sup>th</sup> September 2020 and the last participant was included on 28<sup>th</sup> April 2023.

Box 1 shows the inclusion and exclusion criteria for participation in the study.

### Box 1: Inclusion and exclusion criteria

#### Inclusion criteria

- Female
- Age: 18-39 years old
- Contemplating pregnancy within the next six months
- Understands oral and written Norwegian or English
- At least one of the following criteria must apply:
  - Body mass index  $\geq 25 < 40 \text{ kg/m}^2$ ,
  - Gestational diabetes in a previous pregnancy,
  - Close relative with diabetes (either parents, siblings, or children with diabetes),
  - Fasting plasma glucose  $> 5.3 \text{ mmol/L}$ ,
  - Previous newborn  $> 4.5 \text{ kg}$ , or
  - Non-European ethnicity (with one or both parents originating from an area outside Europe).

#### Exclusion criteria

- On-going pregnancy
- Trying to conceive  $\geq 6$  cycles at study entry
- Known diabetes (type 1 or 2)
- Shift work that includes night shifts  $> 2$  days per week
- Previous hyperemesis
- Known cardiovascular diseases
- High-intensity exercise  $> 2$  times per week in the last 3 months
- Habitual eating window  $\leq 12$  hours
- Bariatric surgery
- Any other reason which according to the researchers makes the potential participant ineligible

## Randomisation and allocation

After screening and assessments at baseline, the participants were randomly allocated (1:1) to the intervention or a standard care control group, after stratifying for GDM in a previous pregnancy (yes/no). At the first visit, the study procedures, equipment, and applications were set up and explained to the participants.

We used a computer random number generator (WebCRF3) developed and administered at The Clinical Research Unit (Klinforsk), NTNU/St. Olav's Hospital, Trondheim, Norway to randomly allocate participants using various block sizes.

## Intervention

The intervention starts before pregnancy and continues throughout pregnancy and consists of a combination of TRE and exercise. Participants are counselled to change their daily time-window of energy intake to  $\leq 10$  hours, ending no later than 19:00 hours, for minimum 5 days per week throughout the intervention. The remaining 2 days are "days off" when they can consume food *ad libitum* if they wish. Apart from current recommendations about preconception/pregnancy nutrition, we give no advice regarding food choices, nor do we encourage a reduced total energy intake.

We use the Personal Activity Intelligence (PAI) score, a science-backed activity metric based on heart rate (HR)(47, 48) to prescribe exercise. Since PAI is HR-based, high-intensity exercise gives substantially higher PAI scores than low-to-moderate-intensity exercise. The goal for the participants in the intervention group is to earn and maintain  $\geq 100$  PAI per week, which can be reached by minimum 1 hour of weekly exercise at  $\geq 80\%$  of HR maximum. One week after the baseline visit, we invite the participants for a supervised introductory exercise session and provide a brochure with exercise options (e.g., treadmill walking/running, cycling). We invite the participants for a second session 2 weeks after the introductory session. The participants can choose their mode of exercise. Once pregnant, we advise the participants to either do short work-bouts at high intensity with low-to-moderate intensity periods in-between, or longer work periods up to 85% of heart rate maximum. We contact the participants not reaching 100 PAI to offer additional supervised exercise sessions, and they can also ask for extra support and supervised exercise sessions if they want to.

Participants in the control group receive standard care and are asked to continue with their habitual physical activity and dietary habits. We contact these participants once every 8 weeks to support adherence to registrations and monitoring.



## Experimental procedures and outcome measures

The study period spans from baseline assessments in the pre-pregnancy period to 6-8 weeks after delivery (Figure 1). Participants who do not become pregnant within 6 months after inclusion in the trial (changed from 12 months from December 2022, see below under modifications to the protocol after trial commencement) are excluded. For participants who experience spontaneous abortions, we add the number of weeks that the participant was pregnant plus 4 weeks to their time in the trial before exclusion pre-pregnancy.

Assessments of the participants are performed twice during preconception (at baseline before randomisation, and after 8 weeks), and twice during pregnancy (in gestational weeks 12 and 28). Outcomes in the newborns are assessed within 72 hours after delivery and at age 6-8 weeks (Figure 2). All participants receive a brochure from the Norwegian Health Directorate with the current recommendations for physical activity, diet, and folic acid, and iodine supplements. The participants are invited to ultrasound examinations in gestational weeks 12, 19, and 32.

### *Primary outcome measure*

The primary outcome measure is plasma glucose concentration obtained 2 hours after a 75 g oral glucose tolerance test (OGTT) in gestational week 28. After an overnight fast ( $\geq 10$  hours) and no exercise for  $\geq 24$  hours, the participants consume 75 g of glucose (Glucosepro, Finnmedical, Finland) diluted in 250 mL water within 5 minutes. Using an indwelling catheter, we collect venous blood before the OGTT, with subsequent collections at 30, 60, 90, and 120 minutes after ingestion of glucose.

### *Secondary outcome measures*

Secondary maternal and neonatal outcome measures (Figure 2) are described below.

### *Blood sampling and biochemistry*

From all visits, fasting blood lipids, plasma glucose, and HbA1c are measured immediately after sampling, at St. Olav's Hospital, following local standardised procedures. Additional fasting plasma, serum, full blood, and urine are stored in a biobank at  $-80^{\circ}\text{C}$  for later analyses. GDM is recorded at Visit 3 and 4, according to the WHO 2013 criteria (fasting plasma glucose 5.1-6.9 mmol/L and/or 2-hour plasma glucose 8.5-11.0 mmol/L after 75 g OGTT).(49) At the event of a GDM diagnosis, the participant and their general practitioner are informed for further evaluation and management. Insulin sensitivity will be calculated using homeostasis model assessment of insulin resistance (HOMA-IR)(50) and pancreatic beta cell function using

1  
2  
3 HOMA- $\beta$ .(50) At visit 3 and 4, the area under the curve (AUC) and incremental AUC (iAUC)  
4 from glucose and insulin concentrations will be calculated from venous blood sampling every  
5 30 minutes during the 2-hour OGTT. Insulin Sensitivity Index,  $ISI_{0,120}$ .(51) insulinogenic index  
6 during the first 30 minutes of the 2-hour OGTT,(52) and beta cell function ( $AUC_{ins}/AUC_{glu}$ )  
7 will be estimated.(53)  
8  
9

### 10 11 12 ***Continuous glucose monitoring***

13 The participants wear a continuous glucose monitor (CGM, FreeStyle Libre 1, Abbott Diabetes  
14 Care, Norway) for 14 days at baseline (7 days pre-intervention followed by the first 7 days of  
15 intervention/control), and for 14 days starting at 8 weeks from baseline. From these  
16 measurements, we will determine 24-hour glycaemic control, 3-hour postprandial glucose  
17 levels (AUC) for the first meal of the day, and nocturnal glycaemic control. The screens of the  
18 CGM readers are taped over to avoid lifestyle changes based on the participants' glucose levels.  
19 We also plan to explore other CGM data that can predict glycaemic control during pregnancy,  
20 using machine learning.  
21  
22  
23  
24  
25  
26  
27  
28

### 29 ***Height, weight, body composition, BMI, and waist circumference***

30 Height is measured with the participants standing without shoes using a standard stadiometer.  
31 Weight and body composition are estimated in the morning after overnight fasting using  
32 bioelectrical impedance analysis (Inbody 720, Biospace CO, Korea), with participants wearing  
33 light clothes and standing barefoot. BMI is calculated as weight in kilograms divided by the  
34 square value of height in metres ( $kg/m^2$ ). To account for the increase in fat-free mass hydration  
35 as pregnancy progresses, we will use a regression equation that estimates fat-free mass density  
36 as a function of gestational age.(54) Waist circumference is measured using a measuring tape  
37 at the level of the belly button with the participant standing.  
38  
39  
40  
41  
42  
43  
44  
45

### 46 ***Cardiorespiratory fitness***

47 We measure peak oxygen uptake ( $VO_{2peak}$ ) using indirect calorimetry (Metalyzer II, Cortex,  
48 Germany), using an individualised treadmill protocol in which the participants walk or run until  
49 volitional exhaustion. The test starts after a 10-minute warm-up. The speed or inclination is  
50 increased every 1 – 2 minutes, by 0.5 – 1.0 km/hour or 1% – 2%.  $VO_{2peak}$  is determined as the  
51 average of the three highest consecutive 10 seconds measured and will be reported as both  
52 absolute (L/min) and relative (mL/min/kg) values. We record HR throughout the exercise tests  
53 and use the peak HR recorded during the test as an estimate of the HR maximum.(55)  
54  
55  
56  
57  
58  
59  
60

### ***Blood pressure and resting heart rate***

We use an automatic blood pressure device (Welch Allyn, Germany) to measure blood pressure (diastolic and systolic, in mmHg) and resting HR (beats per minute, bpm) on the participants' left arm after they have rested in a seated position for 15 minutes. We will report the average of three measurements taken at 1-minute intervals.

### ***Physical activity, diet, and sleep***

We use activity monitors to estimate physical activity levels, energy expenditure, and sleep duration. All participants wear Sensewear Armbands (BodyMedia, Pennsylvania, USA) for 14 days at baseline (7 days pre-intervention followed by the first 7 days of intervention/control), and the participants in the intervention group wear Amazfit GTS (Huami, China) smartwatches throughout the intervention. The smartwatch is connected to the Zepp app and shares PAI data with the research team via the Memento app. Participants register their diet in an online food diary (Fatsecret app) and record the time of first and last energy intake in the project handbook for 4 days (3 weekdays and 1 weekend day) every 8 weeks. They also complete questionnaires about physical activity, sleep quality, and psychological well-being every 8 weeks throughout the study period. We use the following questionnaires: 1) International Physical Activity Questionnaire,(56) 2) Pittsburgh Sleep Quality Index,(57) and 3) Psychological General Well-Being Index.(58) At baseline, the participants fill in the Horne-Östberg Morningsness-Eveningness Questionnaire.(59) We record medication and supplements, early miscarriages, abortions, and time to pregnancy and live birth. Additionally, expectant fathers are asked to complete questionnaires at baseline and every 8 weeks throughout the trial, including questions regarding their body weight, height, physical activity, and diet. These data will be used as co-variates in later analyses.

### ***Neonatal and other outcomes***

We obtain standard clinical neonatal outcomes from hospital birth records. Midwives at St. Olav's Hospital collect umbilical cord blood immediately after birth, prior to the delivery of the placenta. Placental tissues are collected from 1) around the base of the umbilical cord on the foetal side, 2) the periphery on the maternal side (full-thickness tissue), 3) the centre of the maternal side, also for storage in RNAlater solution (Invitrogen, Thermofisher scientific, Lithuania) and 4% formaldehyde solution, and 4) the periphery on the maternal side. The samples are put in 1.8 mL cryotubes and snap-frozen immediately in liquid nitrogen, before storage at -80°C for later analyses. The samples in RNAlater solution are stored at 4°C

1  
2  
3 overnight, followed by storage at  $-80^{\circ}\text{C}$  for later analyses. The samples in 4% formaldehyde  
4 solution are stored under a fume hood at room temperature for 48 hours before histology slide  
5 preparation in collaboration with the CMIC Histology Lab at NTNU.  
6  
7

8  
9  
10 Within 72 hours of birth, and at age 6-8 weeks, body composition of the newborn is  
11 estimated using bioimpedance (BioScan touch i8-nano, Maltron, UK). Additionally, an  
12 experienced paediatric cardiologist examines cardiac morphology, structure, and function in  
13 the newborn, using a Vivid E95 scanner (GE Vingmed Ultrasound, Horten, Norway) and a GE  
14 6s, and M5s phased-array transducers (GE Healthcare, Milwaukee, WI). A full clinical  
15 echocardiography including conventional echocardiographic parameters as well as study  
16 images with a focus on measurement of systolic and diastolic myocardial function is  
17 performed. The scanner is equipped with research software enabling high frame rate  
18 echocardiography to study cardiac flow and tissue properties as described previously.<sup>(60-62)</sup>  
19 A corresponding group of neonates ( $N = 30$ ), from mothers with no known increased risk of  
20 GDM and BMI in the normal range ( $18.6\text{-}24.9\text{ kg/m}^2$ ) will be used for comparison.  
21  
22  
23  
24  
25  
26  
27

### 28 *Adherence*

29  
30 We record adherence to TRE as the average daily time-window for energy intake for 4 days  
31 every 8 weeks. Additionally, we categorise participants as adherent if they report a  $\leq 10$ -hour  
32 time-window for energy intake on  $\geq 2$  of these 4 days. Adherence to exercise is recorded as the  
33 number of PAI points the participants get per rolling 7 days. To ensure compliance and  
34 maintain adherence, we send text messages to all participants as reminders to complete  
35 questionnaires and dietary reporting. We also announce friendly competitions such as “Who  
36 can keep 100 weekly PAI points or more for a whole month?” in a Facebook group for the  
37 participants. The data are only accessible to the researchers and a gift card is awarded to the  
38 winners.  
39  
40  
41  
42  
43  
44  
45  
46

### 47 **Modifications to the protocol after trial commencement**

48 Since June 2021, we invite the participants to participate in a follow-up study after delivery in  
49 which we collect infant faecal samples (immediately after birth, at 6 weeks, and 6 months),  
50 maternal faecal samples (at 6 weeks and 6 months), and breast milk (at 6 weeks and 6 months).  
51 These samples are stored at  $-80^{\circ}\text{C}$  for later analyses. Additionally, we started to offer  
52 supervised exercise training sessions to the participants in the intervention group. From  
53 November 2022, we started sending invitations using eFORSK (electronic form-based data  
54 collection, developed by Central Norway Regional Health Authority) and added ‘Bariatric  
55  
56  
57  
58  
59  
60

1  
2  
3 surgery' to the exclusion criteria. 'Any other reason which according to the researchers makes  
4 the potential participant ineligible' to undergo either or both interventions (e.g., traumatic foot  
5 injury, anorexia/bulimia, etc.) was also added to the exclusion criteria in November 2022. From  
6  
7 December 2022, we removed 'Planned assisted fertilisation with female factor reason' from  
8  
9 the exclusion criteria. In addition, we changed the maximum time before pregnancy from 12  
10  
11 months to 6 months to allow for the trial to be terminated in time for us to analyse the data  
12  
13 within the project period. In March 2023, the required number of total participants was reduced  
14  
15 from 260 to 200 based on the revised calculation as described in the sample size calculation,  
16  
17 with additional specification of stopping before 200 if we had sufficient pregnant participants  
18  
19 for the primary outcome measure. In June 2023, we changed from Amazfit GTS to Polar Ignite  
20  
21 2 (Polar, Finland) smartwatch and from Zepp and Memento to Polar Flow and Mia app.  
22

### 23 **Sample size calculation**

24  
25 The primary outcome of this study is glucose tolerance (after a 2-hour OGTT) in gestational  
26  
27 week 28. The HAPO study results(63) indicate strong, continuous associations of maternal  
28  
29 glucose levels, even below the diagnostic level of GDM with adverse maternal and offspring  
30  
31 outcomes. Based on the increasing risk of adverse maternal and offspring outcomes across 2-  
32  
33 hour plasma glucose categories with a change of ~1 mmol/L, we consider a difference of 1  
34  
35 mmol/L in 2-hour plasma glucose after OGTT between the intervention and control group as  
36  
37 clinically relevant. We also used the observed standard deviation (1 SD = 1.3 mmol/L) in 2-  
38  
39 hour plasma glucose after OGTT in the HAPO study for the sample size calculations.  
40  
41 Calculation of the sample size for a two-sided t-test to detect a difference of 1 mmol/L between  
42  
43 the groups, using an SD of 1.3 mmol/L, a power of 0.90, and a significance level of 0.05, yields  
44  
45 37 participants in each group in gestational week 28. To allow for an expected exclusion from  
46  
47 the study due to not conceiving within the study period (~50%)(64) yielding 74 per group,  
48  
49 further drop-out during the study period (10-20%), yielding 93 per group, and to increase  
50  
51 statistical power for secondary analyses, we initially wanted to include 260 participants in the  
52  
53 trial.

54  
55 However, we terminated the inclusion of new participants at 167 participants since we  
56  
57 had reached 47 participants in each group who were pregnant in gestational week 12. With this  
58  
59 number of participants, we foresee that we will have at least 37 participants in each group in  
60  
61 gestational week 28, allowing for up to 20% dropout during pregnancy. We expect more  
62  
63 participants who are already included to become pregnant in the upcoming period, which will  
64  
65 increase the number of pregnant participants.

### Statistical analyses

The primary analysis will be done according to the ‘intention to treat’ principle, using all obtained data irrespective of participant adherence to the intervention and completeness of outcome measures. We plan to use linear mixed models (LMMs) to compare primary and secondary continuous outcome measures between groups, with time and group x time interactions as fixed effects variables, and subject as random factor.<sup>(65)</sup> Since no systematic baseline differences between the groups are expected in RCTs, means at baseline will be constrained to be equal in the LMMs. We will report estimates with corresponding 95% confidence intervals and p-values for differences between the intervention group and the control group. We will check the normality of residuals by visual inspection of QQ-plots and bootstrapping, transformations or non-parametric methods will be used in cases of non-normal model residuals. For the primary outcome measure, we will consider a p-value < 0.05 as statistically significant. For the secondary outcome measures, p-values < 0.01 will be considered statistically significant, due to multiple comparisons, and these analyses will be explorative. We will also perform per-protocol analyses: Participants with an average of  $\geq 75$  PAI per rolling week and adherence to TRE (as per definition above) during the preconception period will be included in the per-protocol analyses for all outcome measures. We will report additional results from all participants who were included in the trial, from the preconception period, irrespective of whether they became pregnant or not during the study period.

### Blinding

The study is not blinded as it is difficult to blind participants and treatment providers to behavioural intervention. However, baseline assessments are undertaken before randomisation.

### Monitoring

We do not expect any adverse effects in this study. If pregnant women are worried about foetal safety during exercise, we have experienced personnel available in the research group to monitor foetal heart rate during exercise sessions. The investigators are responsible for the documentation of any adverse or serious adverse events in the Case Report Form and the Serious Adverse Events Report Form, respectively. Participants are advised to contact the investigators if they have any unusual symptoms. All serious adverse events will be reported to the sponsor (NTNU) within 24 hours after the investigators have been informed of the event.

### **Patient and public involvement**

We have involved users in the planning of the study and will continue involving them in the implementation and dissemination. In the planning phase, we arranged a 1-hour digital workshop with users (reproductive-aged females with overweight/obesity), where we encouraged the audience to ask questions and give us feedback about relevant topics or issues related to participation. Regarding the challenges of long-term adherence, we use these feedbacks to find ways to incorporate exercise training and TRE into daily life.

### **Ethics and dissemination**

The Regional Committees for Medical and Health Research Ethics in Norway approved the study (REK, reference number 143756). The comparative analysis of the neonatal echocardiography data from this study with a corresponding group of neonates from mothers with normal BMI and no increased risk of GDM is also approved (REK reference number 67584). The work is conducted according to the Declaration of Helsinki and the ICMJE Recommendations for authorship. The participants sign an informed written consent before participating in the study and can at any time withdraw from the study without further explanation. Study specific ID numbers are used as participants' identification. We ensure data quality by double data entry into an electronic CRF and treat the collected data following the General Data Protection Regulation. All protocol modifications are reported to REK. Upon completion of the study and finalization of the study report, we will submit the results for publication and/or in a publicly accessible database of clinical study results after anonymizing the data.

### **Discussion**

Based on a thorough literature search, the BTB study will be the first RCT to investigate the combined effects of TRE and exercise training, initiated before and continued throughout pregnancy, on cardiometabolic parameters in people at risk of GDM and their infants. We hypothesise that the combination of these two lifestyle interventions will induce an additive and clinically relevant improvement in maternal glucose tolerance, and potentially also in our secondary outcome measures in mothers and infants. As such, the initiation of lifestyle modification before pregnancy will provide a better platform for improved adherence and health outcomes, potentially breaking the intergenerational cycle of cardiometabolic disorders, and thereby reducing the risk of diabetes for future generations.

1  
2  
3  
4  
5  
6  
7  
8  
9  
10  
11  
12  
13  
14  
15  
16  
17  
18  
19  
20  
21  
22  
23  
24  
25  
26  
27  
28  
29  
30  
31  
32  
33  
34  
35  
36  
37  
38  
39  
40  
41  
42  
43  
44  
45  
46  
47  
48  
49  
50  
51  
52  
53  
54  
55  
56  
57  
58  
59  
60

So far, there is limited data on the combination of TRE and exercise training in humans. Haganes and colleagues reported that the combination of TRE and HIIT in females with a BMI of  $\geq 27$  kg/m<sup>2</sup> for 7 weeks significantly reduced HbA1c compared with a no-intervention control group and lead to greater losses in body weight, fat mass, and visceral fat area compared with either intervention alone.(26) Since the duration of the intervention is much longer in the BTB trial, there may be lower adherence to one or both intervention strategies. The possible reasons for lower adherence are that the participants may lack motivation for such a long time, find the intervention program boring and/or difficult, or develop physical symptoms that may hinder the participant to adhere to the intervention (especially during pregnancy). Combining motivational human interaction with digital interventions can increase engagement and the effectiveness of behaviour change interventions.(66) To improve adherence throughout the study period, we offer an individualised exercise regimen and provide encouragement, support, and monitor the participants regularly, both in person and over the phone.

The incidence and risk of obesity, insulin resistance, and GDM persists through generations.(67) To disrupt this intergenerational cycle, it is urgently necessary to develop and implement effective and practical lifestyle intervention strategies which can improve the cardiometabolic health outcomes of both mother and offspring. If the preconception lifestyle interventions implemented in this study lead to favourable outcomes and prove to be feasible and effective, it can pave the way for novel interventions that can be adopted in clinical practice during the preconception period, especially among those who are at risk of developing GDM.

### **Author contributions**

MAJS drafted the manuscript. TM, SAN, KÅS, ACI, TF, and SLF conceived and contributed to the design of the study and the plan for analyses. GR, MAJS, and HSS coordinate the study, perform measurements on test days, monitor participants, and supervise the exercise training. SAN performs the echocardiogram on the newborns. All authors provided feedback and approved the final manuscript.

### **Acknowledgments**

The authors wish to thank all the participants for their contribution. We also thank the other members of the research team, Elisabeth Axe and Hilde Lund, who contributed to the execution of the BEFORE THE BEGINNING Study. The equipment and lab facilities for cardiorespiratory fitness testing is provided by NeXt Move, Norwegian University of Science and Technology (NTNU), and the clinical measurements are obtained at the Clinical Research



1  
2  
3 Facility, St. Olavs Hospital. We would also like to thank the midwives at the Women and  
4 Children's Centre, St. Olavs Hospital for the collection of samples related to birth. eFORSK, a  
5 stand-alone form-based information and communications technology solution for electronic  
6 collection of data, developed by Central Norway Regional Health Authority is used for sending  
7 invitations to the study.  
8  
9  
10  
11  
12

### 13 **Funding**

14 The trial is funded by the Novo Nordisk Foundation (NNF19SA058975), The Liaison  
15 Committee for education, research, and innovation in Central Norway (N/A), and The Joint  
16 Research Committee between St. Olav's Hospital and the Faculty of Medicine and Health  
17 Sciences, NTNU (FFU) (N/A). The ultrasound part of the project is also funded by the Centre  
18 for Innovative Ultrasound Solutions (CIUS) (N/A), a large research and innovation project led  
19 by NTNU. The sponsors have no role in study design, data collection, analysis, and publication  
20 of results.  
21  
22  
23  
24  
25  
26  
27

### 28 **Competing interests**

29 The authors declare that they have no competing interests.  
30  
31  
32  
33  
34  
35  
36  
37  
38  
39  
40  
41  
42  
43  
44  
45  
46  
47  
48  
49  
50  
51  
52  
53  
54  
55  
56  
57  
58  
59  
60

## References

1. International Diabetes Federation. IDF Diabetes Atlas, 10th edn. Brussels, Belgium: 2021. Available at: <https://www.diabetesatlas.org>
2. Plows JF, Stanley JL, Baker PN, Reynolds CM, Vickers MH. The Pathophysiology of Gestational Diabetes Mellitus. *Int J Mol Sci.* 2018;19(11):3342.
3. Yu Y, Soohoo M, Sørensen HT, Li J, Arah OA. Gestational Diabetes Mellitus and the Risks of Overall and Type-Specific Cardiovascular Diseases: A Population- and Sibling-Matched Cohort Study. *Diabetes Care.* 2021;45(1):151-9.
4. Moholdt T, Hawley JA. Maternal Lifestyle Interventions: Targeting Preconception Health. *Trends Endocrinol Metab.* 2020;31(8):561-9.
5. Vinter CA, Tanvig MH, Christensen MH, Ovesen PG, Jørgensen JS, Andersen MS, et al. Lifestyle Intervention in Danish Obese Pregnant Women With Early Gestational Diabetes Mellitus According to WHO 2013 Criteria Does Not Change Pregnancy Outcomes: Results From the LiP (Lifestyle in Pregnancy) Study. *Diabetes Care.* 2018;41(10):2079-85.
6. Nyrrnes SA, Garnæs KK, Salvesen Ø, Timilsina AS, Moholdt T, Ingul CB. Cardiac function in newborns of obese women and the effect of exercise during pregnancy. A randomized controlled trial. *PLoS One.* 2018;13(6):e0197334.
7. Gluckman PD, Hanson MA, Buklijas T. A conceptual framework for the developmental origins of health and disease. *J Dev Orig Health Dis.* 2010;1(1):6-18.
8. Cai G-j, Sun X-x, Zhang L, Hong Q. Association between maternal body mass index and congenital heart defects in offspring: a systematic review. *American Journal of Obstetrics and Gynecology.* 2014;211(2):91-117.
9. Petropoulos A. Congenital heart disease and maternal diabetes mellitus. *Евразийский Журнал Клинических Наук.* 2018;1(3):32-9.
10. Lowe WL, Lowe LP, Kuang A, Catalano PM, Nodzenski M, Talbot O, et al. Maternal glucose levels during pregnancy and childhood adiposity in the Hyperglycemia and Adverse Pregnancy Outcome Follow-up Study. *Diabetologia.* 2019;62(4):598-610.
11. Tam WH, Ma RCW, Ozaki R, Li AM, Chan MHM, Yuen LY, et al. In Utero Exposure to Maternal Hyperglycemia Increases Childhood Cardiometabolic Risk in Offspring. *Diabetes Care.* 2017;40(5):679-86.
12. Grunnet LG, Hansen S, Hjort L, Madsen CM, Kampmann FB, Thuesen ACB, et al. Adiposity, Dysmetabolic Traits, and Earlier Onset of Female Puberty in Adolescent Offspring of Women With Gestational Diabetes Mellitus: A Clinical Study Within the Danish National Birth Cohort. *Diabetes Care.* 2017;40(12):1746-55.
13. Management of Diabetes in Pregnancy. *Diabetes Care.* 2017;40(Suppl 1):S114-s9.
14. Gjestland K, Bø K, Owe KM, Eberhard-Gran M. Do pregnant women follow exercise guidelines? Prevalence data among 3482 women, and prediction of low-back pain, pelvic girdle pain and depression. *Br J Sports Med.* 2013;47(8):515-20.
15. Zeanah M, Schlosser SP. Adherence to ACOG Guidelines on Exercise During Pregnancy: Effect on Pregnancy Outcome. *Journal of Obstetric, Gynecologic & Neonatal Nursing.* 1993;22(4):329-35.
16. Tieu J, Shepherd E, Middleton P, Crowther CA. Dietary advice interventions in pregnancy for preventing gestational diabetes mellitus. *Cochrane Database Syst Rev.* 2017;1(1):Cd006674.
17. Martis R, Crowther CA, Shepherd E, Alsweiler J, Downie MR, Brown J. Treatments for women with gestational diabetes mellitus: an overview of Cochrane systematic reviews. *Cochrane Database Syst Rev.* 2018;8(8):Cd012327.
18. Shepherd E, Gomersall JC, Tieu J, Han S, Crowther CA, Middleton P. Combined diet and exercise interventions for preventing gestational diabetes mellitus. *Cochrane Database Syst Rev.* 2017;11(11):Cd010443.
19. Lane M, Robker RL, Robertson SA. Parenting from before conception. *Science.* 2014;345(6198):756-60.

20. Stephenson J, Heslehurst N, Hall J, Schoenaker D, Hutchinson J, Cade JE, et al. Before the beginning: nutrition and lifestyle in the preconception period and its importance for future health. *Lancet*. 2018;391(10132):1830-41.
21. Rönö K, Stach-Lempinen B, Eriksson JG, Pöyhönen-Alho M, Klemetti MM, Roine RP, et al. Prevention of gestational diabetes with a prepregnancy lifestyle intervention - findings from a randomized controlled trial. *Int J Womens Health*. 2018;10:493-501.
22. Raab R, Michel S, Günther J, Hoffmann J, Stecher L, Hauner H. Associations between lifestyle interventions during pregnancy and childhood weight and growth: a systematic review and meta-analysis. *Int J Behav Nutr Phys Act*. 2021;18(1):8-.
23. Sparks JR, Ghildayal N, Hivert M-F, Redman LM. Lifestyle interventions in pregnancy targeting GDM prevention: looking ahead to precision medicine. *Diabetologia*. 2022;65(11):1814-24.
24. Szumilewicz A S-RR, Worska A, Piernicka M, Yu H, Pajaujiene S, et al. How to HIIT while pregnant? The protocol characteristics and effects of high intensity interval training implemented during pregnancy – A systematic review. *Baltic Journal of Health and Physical Activity*. 2022;14(1):1-16.
25. Flanagan EW, Kebbe M, Sparks JR, Redman LM. Assessment of Eating Behaviors and Perceptions of Time-Restricted Eating During Pregnancy. *J Nutr*. 2022;152(2):475-83.
26. Haganes KL, Silva CP, Eyjólfssdóttir SK, Steen S, Grindberg M, Lydersen S, et al. Time-restricted eating and exercise training improve HbA1c and body composition in women with overweight/obesity: A randomized controlled trial. *Cell Metab*. 2022;34(10):1457-71.e4.
27. Termanssen AD, Varming A, van Elst C, Bjerre N, Nørgaard O, Hempler NF, et al. Feasibility of time-restricted eating in individuals with overweight, obesity, prediabetes, or type 2 diabetes: A systematic scoping review. *Obesity (Silver Spring)*. 2023;31(6):1463-85.
28. Ravussin E, Beyl RA, Poggiogalle E, Hsia DS, Peterson CM. Early Time-Restricted Feeding Reduces Appetite and Increases Fat Oxidation But Does Not Affect Energy Expenditure in Humans. *Obesity (Silver Spring)*. 2019;27(8):1244-54.
29. Sutton EF, Beyl R, Early KS, Cefalu WT, Ravussin E, Peterson CM. Early Time-Restricted Feeding Improves Insulin Sensitivity, Blood Pressure, and Oxidative Stress Even without Weight Loss in Men with Prediabetes. *Cell Metab*. 2018;27(6):1212-21.e3.
30. Chair SY, Cai H, Cao X, Qin Y, Cheng HY, Ng MT. Intermittent Fasting in Weight Loss and Cardiometabolic Risk Reduction: A Randomized Controlled Trial. *J Nurs Res*. 2022;30(1):e185.
31. Hutchison AT, Regmi P, Manoogian ENC, Fleischer JG, Wittert GA, Panda S, et al. Time-Restricted Feeding Improves Glucose Tolerance in Men at Risk for Type 2 Diabetes: A Randomized Crossover Trial. *Obesity (Silver Spring)*. 2019;27(5):724-32.
32. Jamshed H, Beyl RA, Della Manna DL, Yang ES, Ravussin E, Peterson CM. Early Time-Restricted Feeding Improves 24-Hour Glucose Levels and Affects Markers of the Circadian Clock, Aging, and Autophagy in Humans. *Nutrients*. 2019;11(6).
33. Wilkinson MJ, Manoogian ENC, Zadourian A, Lo H, Fakhouri S, Shoghi A, et al. Ten-Hour Time-Restricted Eating Reduces Weight, Blood Pressure, and Atherogenic Lipids in Patients with Metabolic Syndrome. *Cell Metab*. 2020;31(1):92-104.e5.
34. Andriessen C, Fealy CE, Veelen A, van Beek SMM, Roumans KHM, Connell NJ, et al. Three weeks of time-restricted eating improves glucose homeostasis in adults with type 2 diabetes but does not improve insulin sensitivity: a randomised crossover trial. *Diabetologia*. 2022;65(10):1710-20.
35. Che T, Yan C, Tian D, Zhang X, Liu X, Wu Z. Time-restricted feeding improves blood glucose and insulin sensitivity in overweight patients with type 2 diabetes: a randomised controlled trial. *Nutr Metab (Lond)*. 2021;18(1):88.
36. Parr EB, Devlin BL, Lim KHC, Moresi LNZ, Geils C, Brennan L, et al. Time-Restricted Eating as a Nutrition Strategy for Individuals with Type 2 Diabetes: A Feasibility Study. *Nutrients*. 2020;12(11).
37. Loy SL, Chan JK, Wee PH, Colega MT, Cheung YB, Godfrey KM, et al. Maternal Circadian Eating Time and Frequency Are Associated with Blood Glucose Concentrations during Pregnancy. *J Nutr*. 2017;147(1):70-7.

- 1  
2  
3 38. Wowdzia JB, Hazell TJ, Davenport MH. Glycemic response to acute high-intensity interval  
4 versus moderate-intensity continuous exercise during pregnancy. *Physiol Rep*. 2022;10(18):e15454.
- 5 39. Szumilewicz A, Santos-Rocha R, Worska A, Piernicka M, Yu H, Pajaujiene S, et al. How to HIIT  
6 while pregnant? The protocol characteristics and effects of high intensity interval training  
7 implemented during pregnancy: A systematic review. *Baltic journal of health and physical activity*.  
8 2022;14(1):1-16.
- 9 40. Yu H, Santos-Rocha R, Radzimiński Ł, Jastrzębski Z, Bonisławska I, Szwarc A, et al. Effects of 8-  
10 Week Online, Supervised High-Intensity Interval Training on the Parameters Related to the Anaerobic  
11 Threshold, Body Weight, and Body Composition during Pregnancy: A Randomized Controlled Trial.  
12 *Nutrients*. 2022;14(24):5279.
- 13 41. Wowdzia J, Hazell T, Vanden Berg E, Labrecque L, Brassard P, Davenport M. Maternal and Fetal  
14 Cardiovascular Responses to Acute High-Intensity Interval and Moderate-Intensity Continuous  
15 Training Exercise During Pregnancy: A Randomized Crossover Trial. *Sports Medicine*. 2023:1-15.
- 16 42. Gaston A, Cramp A. Exercise during pregnancy: a review of patterns and determinants. *J Sci*  
17 *Med Sport*. 2011;14(4):299-305.
- 18 43. Tobias DK, Zhang C, Chavarro J, Bowers K, Rich-Edwards J, Rosner B, et al. Prepregnancy  
19 adherence to dietary patterns and lower risk of gestational diabetes mellitus. *The American Journal*  
20 *of Clinical Nutrition*. 2012;96(2):289-95.
- 21 44. Gao X, Zheng Q, Jiang X, Chen X, Liao Y, Pan Y. The effect of diet quality on the risk of  
22 developing gestational diabetes mellitus: A systematic review and meta-analysis. *Frontiers in Public*  
23 *Health*. 2023;10.
- 24 45. Yong HY, Mohd Shariff Z, Mohd Yusof BN, Rejali Z, Appannah G, Bindels J, et al. The association  
25 between dietary patterns before and in early pregnancy and the risk of gestational diabetes mellitus  
26 (GDM): Data from the Malaysian SECOST cohort. *PLoS One*. 2020;15(1):e0227246.
- 27 46. Chan AW, Tetzlaff JM, Gøtzsche PC, Altman DG, Mann H, Berlin JA, et al. SPIRIT 2013  
28 explanation and elaboration: guidance for protocols of clinical trials. *Bmj*. 2013;346:e7586.
- 29 47. Nes BM, Gutvik CR, Lavie CJ, Nauman J, Wisløff U. Personalized Activity Intelligence (PAI) for  
30 Prevention of Cardiovascular Disease and Promotion of Physical Activity. *Am J Med*. 2017;130(3):328-  
31 36.
- 32 48. Zisko N, Skjerve KN, Tari AR, Sandbakk SB, Wisløff U, Nes BM, et al. Personal Activity  
33 Intelligence (PAI), Sedentary Behavior and Cardiovascular Risk Factor Clustering - the HUNT Study.  
34 *Prog Cardiovasc Dis*. 2017;60(1):89-95.
- 35 49. World Health O. Diagnostic criteria and classification of hyperglycaemia first detected in  
36 pregnancy. Geneva: World Health Organization; 2013 2013. Contract No.: WHO/NMH/MND/13.2.
- 37 50. Matthews DR, Hosker JP, Rudenski AS, Naylor BA, Treacher DF, Turner RC. Homeostasis model  
38 assessment: insulin resistance and  $\beta$ -cell function from fasting plasma glucose and insulin  
39 concentrations in man. *Diabetologia*. 1985;28(7):412-9.
- 40 51. Gutt M, Davis CL, Spitzer SB, Llabre MM, Kumar M, Czarnecki EM, et al. Validation of the insulin  
41 sensitivity index (ISI(0,120)): comparison with other measures. *Diabetes Res Clin Pract*.  
42 2000;47(3):177-84.
- 43 52. Phillips DI, Clark PM, Hales CN, Osmond C. Understanding oral glucose tolerance: comparison  
44 of glucose or insulin measurements during the oral glucose tolerance test with specific measurements  
45 of insulin resistance and insulin secretion. *Diabet Med*. 1994;11(3):286-92.
- 46 53. Stumvoll M, Mitrakou A, Pimenta W, Jenssen T, Yki-Järvinen H, Van Haeften T, et al. Use of the  
47 oral glucose tolerance test to assess insulin release and insulin sensitivity. *Diabetes Care*.  
48 2000;23(3):295-301.
- 49 54. Most J, Marlatt KL, Altazan AD, Redman LM. Advances in assessing body composition during  
50 pregnancy. *Eur J Clin Nutr*. 2018;72(5):645-56.
- 51 55. Berglund IJ, Sørås SE, Relling BE, Lundgren KM, Kiel IA, Moholdt T. The relationship between  
52 maximum heart rate in a cardiorespiratory fitness test and in a maximum heart rate test. *J Sci Med*  
53 *Sport*. 2019;22(5):607-10.
- 54  
55  
56  
57  
58  
59  
60

- 1  
2  
3 56. Craig CL, Marshall AL, Sjöström M, Bauman AE, Booth ML, Ainsworth BE, et al. International  
4 physical activity questionnaire: 12-country reliability and validity. *Med Sci Sports Exerc.*  
5 2003;35(8):1381-95.  
6  
7 57. Buysse DJ, Reynolds CF, 3rd, Monk TH, Berman SR, Kupfer DJ. The Pittsburgh Sleep Quality  
8 Index: a new instrument for psychiatric practice and research. *Psychiatry Res.* 1989;28(2):193-213.  
9 58. Grossi E, Compare A. Psychological General Well-Being Index (PGWB). In: Michalos AC, editor.  
10 *Encyclopedia of Quality of Life and Well-Being Research.* Dordrecht: Springer Netherlands; 2014. p.  
11 5152-6.  
12 59. Adan A, Almirall H. Horne & Östberg Morningness–Eveningness questionnaire: A reduced  
13 scale. *Personality and Individual Differences.* 1991;12:241-53.  
14 60. Nyrnes SA, Fadnes S, Wigen MS, Mertens L, Lovstakken L. Blood Speckle-Tracking Based on  
15 High-Frame Rate Ultrasound Imaging in Pediatric Cardiology. *J Am Soc Echocardiogr.* 2020;33(4):493-  
16 503.e5.  
17 61. Sørensen K, Fadnes S, Mertens L, Henry M, Segers P, Løvstakken L, et al. Assessment of Early  
18 Diastolic Intraventricular Pressure Difference in Children by Blood Speckle-Tracking Echocardiography.  
19 *J Am Soc Echocardiogr.* 2023.  
20 62. Salles S, Lovstakken L, Aase SA, Bjastad TG, Torp H. Clutter Filter Wave Imaging. *IEEE Trans*  
21 *Ultrason Ferroelectr Freq Control.* 2019;66(9):1444-52.  
22 63. Metzger BE, Lowe LP, Dyer AR, Trimble ER, Chaovarindr U, Coustan DR, et al. Hyperglycemia  
23 and adverse pregnancy outcomes. *N Engl J Med.* 2008;358(19):1991-2002.  
24 64. Mikkelsen EM, Riis AH, Wise LA, Hatch EE, Rothman KJ, Sørensen HT. Pre-gravid oral  
25 contraceptive use and time to pregnancy: a Danish prospective cohort study. *Hum Reprod.*  
26 2013;28(5):1398-405.  
27 65. J T, L B, T H, J R, M W, M H. Different ways to estimate treatment effects in randomised  
28 controlled trials. *Contemp Clin Trials Commun.* 2018;10:80-5.  
29 66. Barker M, Dombrowski SU, Colbourn T, Fall CHD, Kriznik NM, Lawrence WT, et al. Intervention  
30 strategies to improve nutrition and health behaviours before conception. *Lancet (London, England).*  
31 2018;391(10132):1853-64.  
32 67. Ma RCW, Popkin BM. Intergenerational diabetes and obesity—A cycle to break? *PLOS*  
33 *Medicine.* 2017;14(10):e1002415.  
34  
35  
36  
37  
38  
39  
40  
41  
42  
43  
44

## 45 FIGURE LEGENDS

### 46 47 48 **Figure 1. Consort flow diagram of the BEFORE THE BEGINNING trial** 49 **(Ongoing study: status 25.09.2020 – 17.07.2023)**

50  
51 \* If the participants are not pregnant within 12 months of inclusion, they are excluded from the  
52 study. From December 2022, the time-window for exclusion if not pregnant was reduced from  
53 12 to 6 months.  
54  
55  
56  
57

### 58 **Figure 2. Overview of time-points for assessments in the trial.**



1  
2  
3  
4  
5  
6  
7  
8  
9  
10  
11  
12  
13  
14  
15  
16  
17  
18  
19  
20  
21  
22  
23  
24  
25  
26  
27  
28  
29  
30  
31  
32  
33  
34  
35  
36  
37  
38  
39  
40  
41

**Weeks**



**Every 8 weeks following visit 1: Food diary (4-day registration), hunger/appetite registration, time-window of energy intake, questionnaires (physical activity, sleep, psychological well-being).**

# Reporting checklist for protocol of a clinical trial.

Based on the SPIRIT guidelines.

## Instructions to authors

Complete this checklist by entering the page numbers from your manuscript where readers will find each of the items listed below.

Your article may not currently address all the items on the checklist. Please modify your text to include the missing information. If you are certain that an item does not apply, please write "n/a" and provide a short explanation.

Upload your completed checklist as an extra file when you submit to a journal.

In your methods section, say that you used the SPIRIT reporting guidelines, and cite them as:

Chan A-W, Tetzlaff JM, Gøtzsche PC, Altman DG, Mann H, Berlin J, Dickersin K, Hróbjartsson A, Schulz KF, Parulekar WR, Krleža-Jerić K, Laupacis A, Moher D. SPIRIT 2013 Explanation and Elaboration: Guidance for protocols of clinical trials. *BMJ*. 2013;346:e7586

|                                   | Reporting Item                                                                                                                  | Page Number |
|-----------------------------------|---------------------------------------------------------------------------------------------------------------------------------|-------------|
| <b>Administrative information</b> |                                                                                                                                 |             |
| Title                             | <a href="#">#1</a> Descriptive title identifying the study design, population, interventions, and, if applicable, trial acronym | 1           |
| Trial registration                | <a href="#">#2a</a> Trial identifier and registry name. If not                                                                  | 2           |



|    |                     |                                                                |                   |
|----|---------------------|----------------------------------------------------------------|-------------------|
| 1  |                     | yet registered, name of intended registry                      |                   |
| 2  |                     |                                                                |                   |
| 3  |                     |                                                                |                   |
| 4  | Trial registration: | <a href="#">#2b</a> All items from the World Health            | n/a               |
| 5  |                     |                                                                |                   |
| 6  | data set            | Organization Trial Registration Data Set                       |                   |
| 7  |                     |                                                                |                   |
| 8  |                     |                                                                |                   |
| 9  | Protocol version    | <a href="#">#3</a> Date and version identifier                 | n/a, see appendix |
| 10 |                     |                                                                |                   |
| 11 |                     |                                                                |                   |
| 12 | Funding             | <a href="#">#4</a> Sources and types of financial, material,   | 16                |
| 13 |                     |                                                                |                   |
| 14 |                     | and other support                                              |                   |
| 15 |                     |                                                                |                   |
| 16 |                     |                                                                |                   |
| 17 | Roles and           | <a href="#">#5a</a> Names, affiliations, and roles of protocol | 1, 15             |
| 18 |                     |                                                                |                   |
| 19 | responsibilities:   | contributors                                                   |                   |
| 20 |                     |                                                                |                   |
| 21 | contributorship     |                                                                |                   |
| 22 |                     |                                                                |                   |
| 23 |                     |                                                                |                   |
| 24 |                     |                                                                |                   |
| 25 | Roles and           | <a href="#">#5b</a> Name and contact information for the trial | n/a, see appendix |
| 26 |                     |                                                                |                   |
| 27 | responsibilities:   | sponsor                                                        |                   |
| 28 |                     |                                                                |                   |
| 29 | sponsor contact     |                                                                |                   |
| 30 |                     |                                                                |                   |
| 31 | information         |                                                                |                   |
| 32 |                     |                                                                |                   |
| 33 |                     |                                                                |                   |
| 34 |                     |                                                                |                   |
| 35 | Roles and           | <a href="#">#5c</a> Role of study sponsor and funders, if      | 16                |
| 36 |                     |                                                                |                   |
| 37 | responsibilities:   | any, in study design; collection,                              |                   |
| 38 |                     |                                                                |                   |
| 39 | sponsor and funder  | management, analysis, and interpretation                       |                   |
| 40 |                     |                                                                |                   |
| 41 |                     | of data; writing of the report; and the                        |                   |
| 42 |                     |                                                                |                   |
| 43 |                     | decision to submit the report for                              |                   |
| 44 |                     |                                                                |                   |
| 45 |                     | publication, including whether they will                       |                   |
| 46 |                     |                                                                |                   |
| 47 |                     | have ultimate authority over any of these                      |                   |
| 48 |                     |                                                                |                   |
| 49 |                     | activities                                                     |                   |
| 50 |                     |                                                                |                   |
| 51 |                     |                                                                |                   |
| 52 |                     |                                                                |                   |
| 53 |                     |                                                                |                   |
| 54 | Roles and           | <a href="#">#5d</a> Composition, roles, and responsibilities   | n/a               |
| 55 |                     |                                                                |                   |
| 56 | responsibilities:   | of the coordinating centre, steering                           |                   |
| 57 |                     |                                                                |                   |
| 58 |                     |                                                                |                   |
| 59 |                     |                                                                |                   |
| 60 |                     |                                                                |                   |

1 committees  
 2  
 3 committee, endpoint adjudication  
 4  
 5 committee, data management team, and  
 6  
 7 other individuals or groups overseeing  
 8  
 9 the trial, if applicable (see Item 21a for  
 10  
 11 data monitoring committee)  
 12

## 13 Introduction

14  
 15  
 16 Background and [#6a](#) Description of research question and 4-5  
 17  
 18 rationale justification for undertaking the trial,  
 19  
 20 including summary of relevant studies  
 21  
 22 (published and unpublished) examining  
 23  
 24 benefits and harms for each intervention  
 25  
 26

27  
 28 Background and [#6b](#) Explanation for choice of comparators 4  
 29  
 30 rationale: choice of  
 31  
 32 comparators  
 33  
 34

35 Objectives [#7](#) Specific objectives or hypotheses 5  
 36  
 37

38 Trial design [#8](#) Description of trial design including type 5  
 39  
 40 of trial (eg, parallel group, crossover,  
 41  
 42 factorial, single group), allocation ratio,  
 43  
 44 and framework (eg, superiority,  
 45  
 46 equivalence, non-inferiority, exploratory)  
 47  
 48  
 49

## 50 Methods:

51  
 52  
 53 Participants,  
 54  
 55 interventions, and  
 56  
 57 outcomes  
 58  
 59  
 60

|    |                      |                      |                                            |                   |
|----|----------------------|----------------------|--------------------------------------------|-------------------|
| 1  | Study setting        | <a href="#">#9</a>   | Description of study settings (eg,         | 5,6               |
| 2  |                      |                      | community clinic, academic hospital) and   |                   |
| 3  |                      |                      | list of countries where data will be       |                   |
| 4  |                      |                      | collected. Reference to where list of      |                   |
| 5  |                      |                      | study sites can be obtained                |                   |
| 6  |                      |                      |                                            |                   |
| 7  |                      |                      |                                            |                   |
| 8  |                      |                      |                                            |                   |
| 9  |                      |                      |                                            |                   |
| 10 |                      |                      |                                            |                   |
| 11 |                      |                      |                                            |                   |
| 12 |                      |                      |                                            |                   |
| 13 | Eligibility criteria | <a href="#">#10</a>  | Inclusion and exclusion criteria for       | 6 (Box 1)         |
| 14 |                      |                      | participants. If applicable, eligibility   |                   |
| 15 |                      |                      | criteria for study centres and individuals |                   |
| 16 |                      |                      | who will perform the interventions (eg,    |                   |
| 17 |                      |                      | surgeons, psychotherapists)                |                   |
| 18 |                      |                      |                                            |                   |
| 19 |                      |                      |                                            |                   |
| 20 |                      |                      |                                            |                   |
| 21 |                      |                      |                                            |                   |
| 22 |                      |                      |                                            |                   |
| 23 |                      |                      |                                            |                   |
| 24 |                      |                      |                                            |                   |
| 25 | Interventions:       | <a href="#">#11a</a> | Interventions for each group with          | 7                 |
| 26 | description          |                      | sufficient detail to allow replication,    |                   |
| 27 |                      |                      | including how and when they will be        |                   |
| 28 |                      |                      | administered                               |                   |
| 29 |                      |                      |                                            |                   |
| 30 |                      |                      |                                            |                   |
| 31 |                      |                      |                                            |                   |
| 32 |                      |                      |                                            |                   |
| 33 |                      |                      |                                            |                   |
| 34 |                      |                      |                                            |                   |
| 35 | Interventions:       | <a href="#">#11b</a> | Criteria for discontinuing or modifying    | n/a, see appendix |
| 36 | modifications        |                      | allocated interventions for a given trial  |                   |
| 37 |                      |                      | participant (eg, drug dose change in       |                   |
| 38 |                      |                      | response to harms, participant request,    |                   |
| 39 |                      |                      | or improving / worsening disease)          |                   |
| 40 |                      |                      |                                            |                   |
| 41 |                      |                      |                                            |                   |
| 42 |                      |                      |                                            |                   |
| 43 |                      |                      |                                            |                   |
| 44 |                      |                      |                                            |                   |
| 45 |                      |                      |                                            |                   |
| 46 |                      |                      |                                            |                   |
| 47 | Interventions:       | <a href="#">#11c</a> | Strategies to improve adherence to         | 11                |
| 48 | adherence            |                      | intervention protocols, and any            |                   |
| 49 |                      |                      | procedures for monitoring adherence        |                   |
| 50 |                      |                      | (eg, drug tablet return; laboratory tests) |                   |
| 51 |                      |                      |                                            |                   |
| 52 |                      |                      |                                            |                   |
| 53 |                      |                      |                                            |                   |
| 54 |                      |                      |                                            |                   |
| 55 |                      |                      |                                            |                   |
| 56 |                      |                      |                                            |                   |
| 57 | Interventions:       | <a href="#">#11d</a> | Relevant concomitant care and              | 7                 |
| 58 |                      |                      |                                            |                   |
| 59 |                      |                      |                                            |                   |
| 60 |                      |                      |                                            |                   |

|    |                      |                     |                                          |              |
|----|----------------------|---------------------|------------------------------------------|--------------|
| 1  | concomitant care     |                     | interventions that are permitted or      |              |
| 2  |                      |                     | prohibited during the trial              |              |
| 3  |                      |                     |                                          |              |
| 4  |                      |                     |                                          |              |
| 5  |                      |                     |                                          |              |
| 6  | Outcomes             | <a href="#">#12</a> | Primary, secondary, and other outcomes,  | 8-11         |
| 7  |                      |                     | including the specific measurement       |              |
| 8  |                      |                     | variable (eg, systolic blood pressure),  |              |
| 9  |                      |                     | analysis metric (eg, change from         |              |
| 10 |                      |                     | baseline, final value, time to event),   |              |
| 11 |                      |                     | method of aggregation (eg, median,       |              |
| 12 |                      |                     | proportion), and time point for each     |              |
| 13 |                      |                     | outcome. Explanation of the clinical     |              |
| 14 |                      |                     | relevance of chosen efficacy and harm    |              |
| 15 |                      |                     | outcomes is strongly recommended         |              |
| 16 |                      |                     |                                          |              |
| 17 |                      |                     |                                          |              |
| 18 |                      |                     |                                          |              |
| 19 |                      |                     |                                          |              |
| 20 |                      |                     |                                          |              |
| 21 |                      |                     |                                          |              |
| 22 |                      |                     |                                          |              |
| 23 |                      |                     |                                          |              |
| 24 |                      |                     |                                          |              |
| 25 |                      |                     |                                          |              |
| 26 |                      |                     |                                          |              |
| 27 |                      |                     |                                          |              |
| 28 |                      |                     |                                          |              |
| 29 | Participant timeline | <a href="#">#13</a> | Time schedule of enrolment,              | 7 (Figure 1) |
| 30 |                      |                     | interventions (including any run-ins and |              |
| 31 |                      |                     | washouts), assessments, and visits for   |              |
| 32 |                      |                     | participants. A schematic diagram is     | 7 (Figure 2) |
| 33 |                      |                     | highly recommended (see Figure)          |              |
| 34 |                      |                     |                                          |              |
| 35 |                      |                     |                                          |              |
| 36 |                      |                     |                                          |              |
| 37 |                      |                     |                                          |              |
| 38 |                      |                     |                                          |              |
| 39 |                      |                     |                                          |              |
| 40 |                      |                     |                                          |              |
| 41 | Sample size          | <a href="#">#14</a> | Estimated number of participants needed  | 12           |
| 42 |                      |                     | to achieve study objectives and how it   |              |
| 43 |                      |                     | was determined, including clinical and   |              |
| 44 |                      |                     | statistical assumptions supporting any   |              |
| 45 |                      |                     | sample size calculations                 |              |
| 46 |                      |                     |                                          |              |
| 47 |                      |                     |                                          |              |
| 48 |                      |                     |                                          |              |
| 49 |                      |                     |                                          |              |
| 50 |                      |                     |                                          |              |
| 51 |                      |                     |                                          |              |
| 52 |                      |                     |                                          |              |
| 53 | Recruitment          | <a href="#">#15</a> | Strategies for achieving adequate        | 7            |
| 54 |                      |                     | participant enrolment to reach target    |              |
| 55 |                      |                     | sample size                              |              |
| 56 |                      |                     |                                          |              |
| 57 |                      |                     |                                          |              |
| 58 |                      |                     |                                          |              |
| 59 |                      |                     |                                          |              |
| 60 |                      |                     |                                          |              |

1 **Methods: Assignment**

2  
3 **of interventions (for**

4  
5 **controlled trials)**

|                                                                                                                                          |                                        |                      |                                                                                                                                                                                                                                                                                                                                                                                  |    |
|------------------------------------------------------------------------------------------------------------------------------------------|----------------------------------------|----------------------|----------------------------------------------------------------------------------------------------------------------------------------------------------------------------------------------------------------------------------------------------------------------------------------------------------------------------------------------------------------------------------|----|
| 6<br>7<br>8<br>9<br>10<br>11<br>12<br>13<br>14<br>15<br>16<br>17<br>18<br>19<br>20<br>21<br>22<br>23<br>24<br>25<br>26<br>27<br>28<br>29 | Allocation: sequence<br>generation     | <a href="#">#16a</a> | Method of generating the allocation<br>sequence (eg, computer-generated<br>random numbers), and list of any factors<br>for stratification. To reduce predictability<br>of a random sequence, details of any<br>planned restriction (eg, blocking) should<br>be provided in a separate document that<br>is unavailable to those who enrol<br>participants or assign interventions | 7  |
| 30<br>31<br>32<br>33<br>34<br>35<br>36<br>37<br>38<br>39<br>40<br>41<br>42<br>43                                                         | Allocation<br>concealment<br>mechanism | <a href="#">#16b</a> | Mechanism of implementing the<br>allocation sequence (eg, central<br>telephone; sequentially numbered,<br>opaque, sealed envelopes), describing<br>any steps to conceal the sequence until<br>interventions are assigned                                                                                                                                                         | 7  |
| 44<br>45<br>46<br>47<br>48<br>49<br>50<br>51<br>52<br>53                                                                                 | Allocation:<br>implementation          | <a href="#">#16c</a> | Who will generate the allocation<br>sequence, who will enrol participants,<br>and who will assign participants to<br>interventions                                                                                                                                                                                                                                               | 7  |
| 54<br>55<br>56<br>57<br>58<br>59<br>60                                                                                                   | Blinding (masking)                     | <a href="#">#17a</a> | Who will be blinded after assignment to<br>interventions (eg, trial participants, care                                                                                                                                                                                                                                                                                           | 13 |

1 providers, outcome assessors, data

2 analysts), and how

3  
4  
5  
6 Blinding (masking): [#17b](#) If blinded, circumstances under which n/a: no blinding  
7  
8 emergency unblinding is permissible, and procedure  
9  
10 unblinding for revealing a participant's allocated  
11  
12 intervention during the trial  
13  
14

15 **Methods: Data**

16 **collection,**

17 **management, and**

18 **analysis**

19  
20  
21  
22  
23  
24  
25  
26 Data collection plan [#18a](#) Plans for assessment and collection of 7-11  
27  
28 outcome, baseline, and other trial data,  
29  
30 including any related processes to  
31  
32 promote data quality (eg, duplicate  
33  
34 measurements, training of assessors)  
35  
36 and a description of study instruments  
37  
38 (eg, questionnaires, laboratory tests)  
39  
40 along with their reliability and validity, if  
41  
42 known. Reference to where data  
43  
44 collection forms can be found, if not in  
45  
46 the protocol  
47  
48  
49

50  
51 Data collection plan: [#18b](#) Plans to promote participant retention 12  
52  
53 retention and complete follow-up, including list of  
54  
55 any outcome data to be collected for  
56  
57 participants who discontinue or deviate  
58  
59

|    |                            |                                                                 |                   |
|----|----------------------------|-----------------------------------------------------------------|-------------------|
| 1  |                            | from intervention protocols                                     |                   |
| 2  |                            |                                                                 |                   |
| 3  |                            |                                                                 |                   |
| 4  | Data management            | <a href="#">#19</a> Plans for data entry, coding, security,     | 14                |
| 5  |                            | and storage, including any related                              |                   |
| 6  |                            | processes to promote data quality (eg,                          |                   |
| 7  |                            | double data entry; range checks for data                        |                   |
| 8  |                            | values). Reference to where details of                          |                   |
| 9  |                            | data management procedures can be                               |                   |
| 10 |                            | found, if not in the protocol                                   |                   |
| 11 |                            |                                                                 |                   |
| 12 |                            |                                                                 |                   |
| 13 |                            |                                                                 |                   |
| 14 |                            |                                                                 |                   |
| 15 |                            |                                                                 |                   |
| 16 |                            |                                                                 |                   |
| 17 |                            |                                                                 |                   |
| 18 |                            |                                                                 |                   |
| 19 |                            |                                                                 |                   |
| 20 | Statistics: outcomes       | <a href="#">#20a</a> Statistical methods for analysing primary  | 13                |
| 21 |                            | and secondary outcomes. Reference to                            |                   |
| 22 |                            | where other details of the statistical                          |                   |
| 23 |                            | analysis plan can be found, if not in the                       |                   |
| 24 |                            | protocol                                                        |                   |
| 25 |                            |                                                                 |                   |
| 26 |                            |                                                                 |                   |
| 27 |                            |                                                                 |                   |
| 28 |                            |                                                                 |                   |
| 29 |                            |                                                                 |                   |
| 30 |                            |                                                                 |                   |
| 31 |                            |                                                                 |                   |
| 32 | Statistics: additional     | <a href="#">#20b</a> Methods for any additional analyses (eg,   | 13                |
| 33 | analyses                   | subgroup and adjusted analyses)                                 |                   |
| 34 |                            |                                                                 |                   |
| 35 |                            |                                                                 |                   |
| 36 |                            |                                                                 |                   |
| 37 |                            |                                                                 |                   |
| 38 | Statistics: analysis       | <a href="#">#20c</a> Definition of analysis population relating | 13                |
| 39 | population and             | to protocol non-adherence (eg, as                               |                   |
| 40 | missing data               | randomised analysis), and any statistical                       |                   |
| 41 |                            | methods to handle missing data (eg,                             |                   |
| 42 |                            | multiple imputation)                                            |                   |
| 43 |                            |                                                                 |                   |
| 44 |                            |                                                                 |                   |
| 45 |                            |                                                                 |                   |
| 46 |                            |                                                                 |                   |
| 47 |                            |                                                                 |                   |
| 48 |                            |                                                                 |                   |
| 49 |                            |                                                                 |                   |
| 50 | <b>Methods: Monitoring</b> |                                                                 |                   |
| 51 |                            |                                                                 |                   |
| 52 |                            |                                                                 |                   |
| 53 | Data monitoring:           | <a href="#">#21a</a> Composition of data monitoring             | n/a, see appendix |
| 54 | formal committee           | committee (DMC); summary of its role                            |                   |
| 55 |                            | and reporting structure; statement of                           |                   |
| 56 |                            |                                                                 |                   |
| 57 |                            |                                                                 |                   |
| 58 |                            |                                                                 |                   |
| 59 |                            |                                                                 |                   |
| 60 |                            |                                                                 |                   |

1 whether it is independent from the  
 2 sponsor and competing interests; and  
 3  
 4 reference to where further details about  
 5  
 6 its charter can be found, if not in the  
 7  
 8 protocol. Alternatively, an explanation of  
 9  
 10 why a DMC is not needed  
 11  
 12  
 13  
 14

|                                            |                      |                                                                                                                                                                                                                                                     |                   |
|--------------------------------------------|----------------------|-----------------------------------------------------------------------------------------------------------------------------------------------------------------------------------------------------------------------------------------------------|-------------------|
| 15 Data monitoring:<br>16 interim analysis | <a href="#">#21b</a> | Description of any interim analyses and<br>17 stopping guidelines, including who will<br>18 have access to these interim results and<br>19 make the final decision to terminate the<br>20 trial<br>21<br>22<br>23<br>24                             | n/a               |
| 27 Harms                                   | <a href="#">#22</a>  | Plans for collecting, assessing, reporting,<br>28 and managing solicited and<br>29 spontaneously reported adverse events<br>30 and other unintended effects of trial<br>31 interventions or trial conduct<br>32<br>33<br>34<br>35<br>36<br>37<br>38 | 13                |
| 39 Auditing                                | <a href="#">#23</a>  | Frequency and procedures for auditing<br>40 trial conduct, if any, and whether the<br>41 process will be independent from<br>42 investigators and the sponsor<br>43<br>44<br>45<br>46<br>47<br>48                                                   | n/a, see appendix |
| 49 Ethics and<br>50 dissemination          |                      |                                                                                                                                                                                                                                                     |                   |
| 54 Research ethics<br>55 approval          | <a href="#">#24</a>  | Plans for seeking research ethics<br>56 committee / institutional review board<br>57<br>58                                                                                                                                                          | 14                |



|    |                    |                                                              |       |
|----|--------------------|--------------------------------------------------------------|-------|
| 1  |                    | (REC / IRB) approval                                         |       |
| 2  |                    |                                                              |       |
| 3  |                    |                                                              |       |
| 4  | Protocol           | <a href="#">#25</a> Plans for communicating important        | 11-12 |
| 5  |                    |                                                              |       |
| 6  | amendments         | protocol modifications (eg, changes to                       |       |
| 7  |                    |                                                              |       |
| 8  |                    | eligibility criteria, outcomes, analyses) to                 |       |
| 9  |                    |                                                              |       |
| 10 |                    | relevant parties (eg, investigators, REC /                   |       |
| 11 |                    |                                                              |       |
| 12 |                    | IRBs, trial participants, trial registries,                  |       |
| 13 |                    |                                                              |       |
| 14 |                    | journals, regulators)                                        |       |
| 15 |                    |                                                              |       |
| 16 |                    |                                                              |       |
| 17 |                    |                                                              |       |
| 18 | Consent or assent  | <a href="#">#26a</a> Who will obtain informed consent or     | 13    |
| 19 |                    |                                                              |       |
| 20 |                    | assent from potential trial participants or                  |       |
| 21 |                    |                                                              |       |
| 22 |                    | authorised surrogates, and how (see                          |       |
| 23 |                    |                                                              |       |
| 24 |                    | Item 32)                                                     |       |
| 25 |                    |                                                              |       |
| 26 |                    |                                                              |       |
| 27 |                    |                                                              |       |
| 28 | Consent or assent: | <a href="#">#26b</a> Additional consent provisions for       | 14    |
| 29 |                    |                                                              |       |
| 30 | ancillary studies  | collection and use of participant data and                   |       |
| 31 |                    |                                                              |       |
| 32 |                    | biological specimens in ancillary studies,                   |       |
| 33 |                    |                                                              |       |
| 34 |                    | if applicable                                                |       |
| 35 |                    |                                                              |       |
| 36 |                    |                                                              |       |
| 37 |                    |                                                              |       |
| 38 | Confidentiality    | <a href="#">#27</a> How personal information about potential | 14    |
| 39 |                    |                                                              |       |
| 40 |                    | and enrolled participants will be                            |       |
| 41 |                    |                                                              |       |
| 42 |                    | collected, shared, and maintained in                         |       |
| 43 |                    |                                                              |       |
| 44 |                    | order to protect confidentiality before,                     |       |
| 45 |                    |                                                              |       |
| 46 |                    | during, and after the trial                                  |       |
| 47 |                    |                                                              |       |
| 48 |                    |                                                              |       |
| 49 |                    |                                                              |       |
| 50 | Declaration of     | <a href="#">#28</a> Financial and other competing interests  | 16    |
| 51 |                    |                                                              |       |
| 52 | interests          | for principal investigators for the overall                  |       |
| 53 |                    |                                                              |       |
| 54 |                    | trial and each study site                                    |       |
| 55 |                    |                                                              |       |
| 56 |                    |                                                              |       |
| 57 | Data access        | <a href="#">#29</a> Statement of who will have access to the | 14    |
| 58 |                    |                                                              |       |
| 59 |                    |                                                              |       |
| 60 |                    |                                                              |       |

|    |                       |                                                                 |              |
|----|-----------------------|-----------------------------------------------------------------|--------------|
| 1  |                       | final trial dataset, and disclosure of                          |              |
| 2  |                       |                                                                 |              |
| 3  |                       | contractual agreements that limit such                          |              |
| 4  |                       |                                                                 |              |
| 5  |                       | access for investigators                                        |              |
| 6  |                       |                                                                 |              |
| 7  |                       |                                                                 |              |
| 8  | Ancillary and post    | <a href="#">#30</a> Provisions, if any, for ancillary and post- | 13           |
| 9  |                       |                                                                 |              |
| 10 | trial care            | trial care, and for compensation to those                       |              |
| 11 |                       |                                                                 |              |
| 12 |                       | who suffer harm from trial participation                        |              |
| 13 |                       |                                                                 |              |
| 14 |                       |                                                                 |              |
| 15 | Dissemination policy: | <a href="#">#31a</a> Plans for investigators and sponsor to     | 14           |
| 16 |                       |                                                                 |              |
| 17 | trial results         | communicate trial results to participants,                      |              |
| 18 |                       | healthcare professionals, the public, and                       |              |
| 19 |                       | other relevant groups (eg, via publication,                     |              |
| 20 |                       | reporting in results databases, or other                        |              |
| 21 |                       | data sharing arrangements), including                           |              |
| 22 |                       | any publication restrictions                                    |              |
| 23 |                       |                                                                 |              |
| 24 |                       |                                                                 |              |
| 25 |                       |                                                                 |              |
| 26 |                       |                                                                 |              |
| 27 |                       |                                                                 |              |
| 28 |                       |                                                                 |              |
| 29 |                       |                                                                 |              |
| 30 |                       |                                                                 |              |
| 31 |                       |                                                                 |              |
| 32 | Dissemination policy: | <a href="#">#31b</a> Authorship eligibility guidelines and any  | 14           |
| 33 |                       |                                                                 |              |
| 34 | authorship            | intended use of professional writers                            |              |
| 35 |                       |                                                                 |              |
| 36 |                       |                                                                 |              |
| 37 |                       |                                                                 |              |
| 38 | Dissemination policy: | <a href="#">#31c</a> Plans, if any, for granting public access  | 14           |
| 39 |                       |                                                                 |              |
| 40 | reproducible          | to the full protocol, participant-level                         |              |
| 41 |                       | dataset, and statistical code                                   |              |
| 42 | research              |                                                                 |              |
| 43 |                       |                                                                 |              |
| 44 |                       |                                                                 |              |
| 45 | <b>Appendices</b>     |                                                                 |              |
| 46 |                       |                                                                 |              |
| 47 |                       |                                                                 |              |
| 48 | Informed consent      | <a href="#">#32</a> Model consent form and other related        | See Appendix |
| 49 |                       |                                                                 |              |
| 50 | materials             | documentation given to participants and                         |              |
| 51 |                       | authorised surrogates                                           |              |
| 52 |                       |                                                                 |              |
| 53 |                       |                                                                 |              |
| 54 |                       |                                                                 |              |
| 55 |                       |                                                                 |              |
| 56 | Biological specimens  | <a href="#">#33</a> Plans for collection, laboratory            | 8ssss-11     |
| 57 |                       |                                                                 |              |
| 58 |                       |                                                                 |              |
| 59 |                       |                                                                 |              |
| 60 |                       |                                                                 |              |

1 evaluation, and storage of biological  
2  
3 specimens for genetic or molecular  
4  
5 analysis in the current trial and for future  
6  
7 use in ancillary studies, if applicable  
8  
9

10 The SPIRIT Explanation and Elaboration paper is distributed under the terms of the Creative  
11 Commons Attribution License CC-BY-NC. This checklist was completed on 17. July 2023 using  
12  
13 <https://www.goodreports.org/>, a tool made by the [EQUATOR Network](#) in collaboration with  
14  
15 [Penelope.ai](#)  
16  
17  
18  
19  
20  
21  
22  
23  
24  
25  
26  
27  
28  
29  
30  
31  
32  
33  
34  
35  
36  
37  
38  
39  
40  
41  
42  
43  
44  
45  
46  
47  
48  
49  
50  
51  
52  
53  
54  
55  
56  
57  
58  
59  
60
